# Supplementary material for: Association between cellular HIV-1 DNA level and mortality in HIV-1 infected African adults starting ART with high CD4 counts
Source: PubMed Central journal article supplement — eBioMedicine. 2020 Jun 5;56:102815. doi: 10.1016/j.ebiom.2020.102815 (PMC7276518; doi:10.1016/j.ebiom.2020.102815), 2020-06-05
Supplement: mmc2.pdf [file mmc2.pdf]

## Supplemental Appendix 2

This supplement contains the following items:

1. Original protocol (V3.0, French Version), including original statistical analysis plan
2. Final protocol (V7.0, English version), including summary of all amendments, summary of changes, and final statistical analysis plan

**Bénéfices et risques d'un traitement antirétroviral précoce et  
d'une prophylaxie par 6 mois d'INH chez des adultes infectés par  
le VIH ayant entre 250 et 500 CD4/mm<sup>3</sup>**

**à Abidjan, Côte d'Ivoire :**

**Essai randomisé de type plan factoriel**

**(ANRS 12136 « Temprano »)**

***PROTOCOLE D'ESSAI CLINIQUE DE PHASE III***

**Version n°3.0 du 27 Septembre 2007**

Approuvée par le Ministre de la Santé et de l'Hygiène Publique de Côte d'Ivoire, après avis favorable du Comité National d'Ethique des Sciences de la Vie et de la Santé de Côte d'Ivoire.

|                                                                                                       |
|-------------------------------------------------------------------------------------------------------|
| NLM Identifiant ( <a href="http://clinicaltrials.gov/">http://clinicaltrials.gov/</a> ) : NCT00495651 |
|-------------------------------------------------------------------------------------------------------|

Promoteur :

*Date et signature :*

**Agence nationale de recherches sur le  
sida et les hépatites virales (ANRS)**

**Directeur : Pr Jean-François Delfraissy**

101 rue de Tolbiac

75013 PARIS

France

Tél. : 01 53 94 60 00 - Fax : 01 53 94 60 01

e-mail : [jf.delfraissy@anrs.fr](mailto:jf.delfraissy@anrs.fr)

Investigateurs Coordonnateurs :

**Pr Serge Eholié**

Service des Maladies Infectieuses et  
Tropicales

CHU de Treichville

BPV3 Abidjan

Côte d'Ivoire

Tél. : +225 05 65 51 04

Fax : +33 (0)5 57 57 45 28

e-mail : [speholie@afnet.net](mailto:speholie@afnet.net)

**Dr Xavier Anglaret**

INSERM U593

Université Victor Segalen Bordeaux 2

146 rue Léo Saignat

33076 Bordeaux cedex

France

Tel : +33 (0)5 57 57 12 58

Fax : +33 (0)5 57 57 45 28

e-mail : [Xavier.Anglaret@isped.u-bordeaux2.fr](mailto:Xavier.Anglaret@isped.u-bordeaux2.fr)

*Date et signature :*

*Date et signature :*

## Centre de Coordination à Abidjan, Côte d'Ivoire

**Programme PAC-CI**

**18 BP 1954**

**Abidjan 18**

**Côte d'Ivoire**

**Tel : +225 21 75 59 60 ; Fax : +225 21 24 90 69**

### Coordinatrice

**Dr Christine Danel**

Tél. : +225 21 75 59 63

e-mail : Christine.Danel@pacci.ci

### Moniteurs

**Dr Eric Ouattara**

Mobile: +225 08 08 45 69

e-mail : Eric.Ouattara@pacci.ci

**Dr Raoul Moh**

Mobile: +225 07 82 83 79

e-mail : Raoul.Moh@pacci.ci

### Gestionnaire de bases de données

**Mr Franck Bohoussou**

e-mail : Franck.Bohoussou@pacci.ci

### Pharmacien

**Mr Romuald Konan**

Mobile: +225 07 20 37 53

e-mail : Romuald.Konan@pacci.ci

## Centre de Coordination à Bordeaux, France

**INSERM U593**

**146 rue Léo Saignat, case n°11**

**33076 BORDEAUX Cedex**

**France**

**Tel : +33 (0)5 57 57 17 67 ; Fax : +33 (0)5 57 57 45 28**

### Statisticienne

**Mme Delphine Gabillard**

Tél : +33 (0)5 57 57 45 17

e-mail : Delphine.Gabillard@isped.u-bordeaux2.fr

### Moniteur

**Dr Jérôme Le Carrou**

Tél. : +33 (0)5 57 57 92 61

e-mail : Jerome.Lecarrou@isped.u-bordeaux2.fr

### Méthodologiste

**Dr Valérie Journot**

Tél : +33 (0)5 57 57 10 58

e-mail : Valerie.Journot@isped.u-bordeaux2.fr

## **Centres de prise en charge à Abidjan, Côte d'Ivoire**

### **Centre de Prise en Charge et de Formation (CePReF)**

**Dr Amani Anzian**

Adresse postale: 23 BP 2485 Abidjan 23

Abidjan

Côte d'Ivoire

Mobile: +225 07 20 37 95

e-mail : amanianzian@yahoo.fr

### **Centre Intégré de Recherches Biocliniques d'Abidjan (CIRBA)**

**Dr Henri Chenal**

Adresse postale : 18 BP 2071 Abidjan 18

Abidjan

Côte d'Ivoire

Mobile : +225 07 69 84 58

e-mail : chenal@aviso.ci

### **Unité de Soins et de Conseil Ambulatoires (USAC)**

**Dr Constance Kanga**

Adresse postale : BP V 3- Chu de Treichville

Abidjan

Côte d'Ivoire

Tel : +225-21-25-94-13

e-mail : dockanga@yahoo.fr

### **Centre de suivi des donneurs de sang, Centre National de Transfusion Sanguine (CNTS)**

**Dr Albert Minga**

Adresse postale : 18 BP 1954 Abidjan 18

Abidjan

Côte d'Ivoire

Mobile : +225 07 08 76 61

e-mail : albert.minga@pacci.ci

### **Service des Maladies Infectieuses et Tropicales (SMIT)**

**Pr Emmanuel Bissagnene**

CHU de Treichville

BPV3 Abidjan

Côte d'Ivoire

Mobile: +225 07 73 17 23

e-mail : [bissagnene@yahoo.fr](mailto:bissagnene@yahoo.fr)

## Laboratoire de biologie à Abidjan, Côte d'Ivoire

CeDReS  
CHU de Treichville  
BPV3 Abidjan  
Côte d'Ivoire  
Tel : +225-21-25-84-59 ; Fax: +225 21 24 92 06

### Directeur

**Pr Hervé Ménan**  
Mobile : +225 07 00 07 45  
e-mail : rvmenan@yahoo.fr

### Bactériologiste

**Dr Timothée Ouassa**  
Mobile : +225 05 07 75 02  
e-mail : timouassa@yahoo.fr

### Immunologiste

**Pr André Inwoley**  
Mobile : +225 05 05 85 87  
e-mail : ikandre@yahoo.fr

### Biologiste moléculaire

**Dr Dominique Joulia**  
Mobile : +225 07 27 35 97  
e-mail : domijoulia@yahoo.fr

## Centre de référence pour les mycobactéries à Abidjan, Côte d'Ivoire

**Pr Mireille Dosso**  
Institut Pasteur Cote d'Ivoire  
01 BP 490 Abidjan 01  
Cote d'Ivoire  
Tel : +225 22 48 53 63  
e-mail : mireilledosso@yahoo.fr

## Centre de référence pour les mycobactéries à Paris, France

**Pr Vincent Jarlier**  
Laboratoire de Bactériologie-Hygiène  
CHU Pitié-Salpêtrière  
91 Bd de l'Hôpital  
75013 Paris, France  
Tel : +33 (0) 1 40 77 97 42  
e-mail : vincent.jarlier@psl.aphp.fr

## Centre de référence pour la virologie à Paris, France

**Pr Christine Rouzioux**  
Laboratoire de virologie  
CHU Necker  
149, rue de Sèvres  
75730 Paris Cedex 15, France  
Tel : +33 (0) 1 44 49 40 00  
e-mail : christine.rouzioux@nck.aphp.fr

## **Résumé**

**Contexte** : Avec les critères actuels de début du traitement antirétroviral (ARV) en Afrique sub-Saharienne, la morbidité sévère dans les premiers mois du traitement ARV reste trop élevée et la tuberculose reste la première maladie opportuniste. La survenue d'un épisode de morbidité sévère sous ARV diminue les chances de succès thérapeutique. Diminuer le risque de morbidité sévère en début de traitement ARV pourrait : (i) augmenter l'efficacité du traitement et (ii) permettre une diffusion plus large des traitements ARV qui deviendraient plus facile à implanter dans des structures de soin périphériques.

**Objectif** : Comparer à 30 mois après la randomisation, chez des personnes adultes infectées par le VIH ayant entre 250 et 500 CD4/mm<sup>3</sup> et pas de critère clinique de mise en route immédiate d'un traitement ARV, l'efficacité de la stratégie actuelle consistant à attendre les critères OMS pour mettre en route le traitement ARV à celle de deux interventions actuellement non recommandées : six mois de chimioprophylaxie par isoniazide avant la mise sous ARV, et début plus précoce du traitement ARV.

**Lieu** : Abidjan, Côte d'Ivoire.

**Méthode** : Essai randomisé, de supériorité, sans insu sur le traitement, multicentrique. Le schéma d'étude est un plan factoriel 2\*2.

**Principaux critères d'inclusion** : (i) Sérologie VIH-1 ou VIH-1+2 positive ; (ii) âge  $\geq$  18 ans ; (iii) nadir de CD4 entre 350/mm<sup>3</sup> et 500/mm<sup>3</sup> et stade clinique OMS 1, 2 ou 3 OU nadir de CD4 entre 250/mm<sup>3</sup> et 350/mm<sup>3</sup> et stade clinique OMS 1 ; (iv) absence de tuberculose active.

**Bras de randomisation** : Bras I : Début d'un traitement ARV à n'importe quel moment du suivi dans l'essai, sur les critères nationaux et OMS actuels : (i) CD4 < 200/mm<sup>3</sup>, ou (ii) survenue d'une pathologie du stade 4, ou (iii) survenue d'une pathologie du stade 3 et CD4 entre 200 et 350/mm<sup>3</sup> ; Bras II : prophylaxie de six mois par isoniazide 300 mg/jour, avec début du traitement ARV sur les critères nationaux et OMS actuels ; Bras III : traitement ARV immédiat sans attendre les critères nationaux et OMS actuels ; Bras IV : prophylaxie de six mois par isoniazide 300 mg/jour, avec traitement ARV immédiat sans attendre les critères nationaux et OMS actuels.

**Régimes antirétroviraux de première intention** :

- **ténofovir-emtricitabine-efavirenz** pour les hommes infectés par le VIH-1, ou les femmes infectées par le VIH-1 remplissant les deux conditions suivantes : contraception efficace effective, et absence d'antécédent de prévention de la transmission du VIH de la mère à l'enfant (PTME) par un régime contenant de la névirapine ;
- **ténofovir-emtricitabine-lopinavir/ritonavir** ou **ténofovir-emtricitabine-zidovudine** pour les femmes ne prenant pas de contraception efficace et/ou ayant un antécédent de prévention de la transmission du VIH de la mère à l'enfant par un régime contenant de la névirapine, et pour les personnes co-infectées par les VIH 1 et 2.

**Critère de jugement principal** : probabilité de survenue du décès (quelle qu'en soit la cause) ou d'un épisode de « tuberculose active ».

**Principaux critères de jugement secondaires** : probabilité de survenue des effets secondaires cliniques ou biologiques de grade 3 ou 4 selon l'échelle de gravité de l'ANRS et des événements cliniques de stade 3 ou 4 de la classification en stades cliniques de l'OMS.

**Taille de l'étude et analyse** : 2000 patients seront randomisés (500 dans chaque bras). L'essai est un plan factoriel, les deux bras « isoniazide » (bras II et IV) seront comparés aux bras « pas d'isoniazide » (bras I et III), et les deux bras « antirétroviraux précoce » (bras III et IV) aux bras « antirétroviraux selon les recommandations nationales » (bras I et II).

**Echéancier** : Période d'inclusion : 18 mois ; Durée de participation par patient : 30 mois ; Durée de l'essai: 48 mois.

## **Essai Temprano ANRS 12136**

# **Lettre d'information des personnes auxquelles est proposée la participation**

Madame ou Monsieur,

Le médecin et l'assistant(e) social(e) que vous allez voir vont vous proposer de participer à une étude intitulée « Bénéfices et risques d'un traitement antirétroviral précoce et d'une prophylaxie par 6 mois d'Isoniazide chez des adultes infectés par le VIH ayant entre 250 et 500 CD4/mm<sup>3</sup> à Abidjan, Côte d'Ivoire ».

Cette étude est financée par l'ANRS (Agence Nationale de Recherche sur le Sida), dans le cadre d'un programme collaboratif entre cette agence française et le Ministère de la Santé de Côte d'Ivoire. Ce programme a pour but de mener des recherches dites « cliniques » destinées à améliorer les traitements des personnes vivant avec le VIH. Il existe depuis 1993, et a déjà permis de mener à bien plusieurs études importantes, comme l'essai Cotrimo-CI, l'essai Ditrane et l'essai Trivacan.

### **Qu'est ce que « l'infection par le virus VIH » et le « SIDA » ?**

Le SIDA est une maladie due à un virus appelé le VIH.

Ce virus VIH est très fréquent à Abidjan, puisque environ une personne adulte sur dix en est porteuse.

Quand on est infecté par le virus, les défenses du corps contre les infections (on dit aussi les défenses immunitaires) disparaissent petit à petit. En général, au début on ne s'aperçoit de rien, puis au bout de quelques années les défenses immunitaires sont moins fortes, on devient fragile et on tombe de plus en plus souvent malade parce qu'on n'arrive plus à se défendre contre les maladies. Les autres maladies qu'on risque alors d'attraper sont d'abord des maladies courantes (tuberculose, pneumonie, etc...). Puis, un peu plus tard, quand les défenses immunitaires ont presque totalement disparu, on attrape des maladies plus rares, plus graves et plus difficiles à soigner. C'est à ce moment là qu'on dit qu'on a le SIDA.

### **Quels sont les traitements du Virus VIH ?**

Il n'existe aujourd'hui aucun médicament qui arrive à guérir complètement l'infection par le VIH. Quand on a le virus VIH, on le garde toute sa vie.

Cependant, il existe des médicaments qui attaquent fortement le virus sans le supprimer totalement. On appelle ces médicaments les **antirétroviraux**.

Ces médicaments antirétroviraux permettent de maintenir les défenses du corps à un niveau suffisamment élevé pour que les autres maladies ne se développent pas, et donc qu'on n'ait jamais le SIDA. Ces médicaments antirétroviraux sont donc très efficaces.

### **Quels sont les inconvénients des médicaments antirétroviraux ?**

Comme tous médicaments efficaces, les médicaments antirétroviraux ont des inconvénients.

Premièrement, certains d'entre eux peuvent avoir des effets désagréables (ou **effets indésirables**). Il faut donc que les personnes qui prennent ces médicaments soient

surveillées régulièrement par un médecin, pour pouvoir détecter ces effets indésirables, et, éventuellement si ces effets indésirables sont graves, pour changer de médicament.

Deuxièmement, il faut prendre les médicaments antirétroviraux très régulièrement pour éviter que le virus devienne résistant aux médicaments. En effet, si on prend mal les médicaments, et notamment si on les prend de façon incomplète, en oubliant des prises, le virus peut devenir résistant aux médicaments antirétroviraux et le traitement ne marchera plus. Quand on débute un traitement avec des médicaments antirétroviraux, il faut donc bien comprendre qu'il est très important de continuer ensuite ce traitement toute sa vie et sans manquer de prise.

Troisièmement, il semble que les médicaments antirétroviraux ne suppriment pas totalement le risque d'attraper certaines maladies, notamment la **tuberculose**. En effet on a remarqué que la tuberculose continuait à être assez fréquente chez certaines personnes qui débutent un traitement antirétroviral, surtout pendant la première année de traitement, et surtout chez les personnes qui ont commencé le traitement antirétroviral alors que leurs défenses immunitaires étaient déjà très affaiblies.

### **Quelles sont les questions qu'on se pose sur ces traitements antirétroviraux ?**

Maintenant que les médicaments antirétroviraux sont disponibles en Côte d'Ivoire et qu'on sait qu'ils marchent bien, deux questions importantes se posent.

La première question est : **à quel moment doit-on commencer à prendre les médicaments antirétroviraux ?** Pour l'instant, il y a des recommandations nationales qui fixent le début des médicaments antirétroviraux à un stade de défense immunitaire « intermédiaire », c'est à dire juste avant qu'on risque d'avoir le SIDA. Or, on se demande s'il ne faudrait pas en fait commencer le traitement quelques mois ou quelques années plus tôt, notamment pour éviter le risque d'attraper la tuberculose en début de traitement.

La deuxième question est : **est-ce qu'on ne pourrait pas proposer de prendre un médicament antituberculeux pendant six mois juste avant de débiter le traitement antirétroviral (ou au début du traitement antirétroviral), pour diminuer le risque de développer une tuberculose par la suite ?** Ce type d'intervention s'appelle une **prophylaxie antituberculeuse**. Elle n'est pas recommandée actuellement en Côte d'Ivoire.

La recherche à laquelle nous vous proposons de participer a pour but de répondre à ces deux questions. Comme toute recherche sur des traitements, elle se propose de voir si les deux interventions proposées (le début précoce des médicaments antirétroviraux et la prophylaxie antituberculeuse) sont efficaces mais aussi de voir si elles n'ont pas trop d'inconvénients, afin de savoir ensuite si elles doivent être largement recommandées ou non.

### **Comment va se dérouler l'étude ?**

Si on vous propose aujourd'hui de rentrer dans cette étude, c'est que vous n'avez pas encore atteint les critères fixés par le Ministère de la Santé pour débiter un traitement antirétroviral, mais qu'il est probable que vous remplissiez ces critères dans les mois ou les un ou deux ans qui viennent.

Si vous acceptez de participer, voici comment ça se passera.

Tout d'abord, on vous affectera par tirage au sort à une des 4 possibilités suivantes :



- Soit on vous demandera de débiter immédiatement un traitement antirétroviral (sans attendre que vous ayez les critères définis par le Ministère de la Santé), accompagné pendant six mois par une prophylaxie antituberculeuse ;
- Soit on vous demandera de débiter immédiatement un traitement antirétroviral (sans attendre que vous ayez les critères définis par le Ministère de la Santé), mais on ne vous donnera pas de prophylaxie antituberculeuse ;
- Soit on vous demandera de débiter une prophylaxie antituberculeuse et de la prendre pendant six mois, mais on ne vous demandera pas de débiter immédiatement un traitement antirétroviral ; le traitement antirétroviral vous sera alors proposé à tout moment au cours du suivi en fonction des résultats de vos examens, dès que vous aurez atteint les critères définis par le Ministère de la Santé ;
- Soit on ne vous donnera pas de prophylaxie antituberculeuse, et on ne vous demandera pas de débiter immédiatement un traitement antirétroviral ; le traitement antirétroviral vous sera alors proposé à tout moment au cours du suivi en fonction des résultats de vos examens, dès que vous aurez atteint les critères définis par le Ministère de la Santé ;

Quelle que soit la « stratégie » à laquelle vous aurez été affecté, nous vous demanderons ensuite pendant trente mois :

- d'assister aux consultations de suivi (une fois par mois pendant les trois premiers mois, puis une fois tous les trois mois) ;
- d'accepter une prise de sang (une fois tous les six mois)
- de revenir au centre dans lequel vous êtes suivi à chaque fois que vous serez malade.
- de prendre les médicaments qui vous seront prescrits.

Votre participation à cette recherche n'impliquera donc pas de votre part des rendez-vous médicaux ou des prélèvements de sang plus fréquents que ceux qui sont actuellement pratiqués dans votre suivi médical habituel.

Pendant les 30 mois de participation à l'étude, tous les traitements vous seront donnés gratuitement, y compris les médicaments antirétroviraux et les médicaments des infections opportunistes dont vous pourrez avoir besoin si vous tombez malade. De même, l'étude prendra en charge les examens biologiques et radiologiques, ainsi que les hospitalisations si elles sont nécessaires.

A chaque fois que vous viendrez ici, soit pour une visite régulière, soit pour vous faire soigner parce que vous serez malade, on vous remboursera votre déplacement sur une base forfaitaire.

### **Quels sont les avantages et les inconvénients de votre décision de participer ?**

Le suivi qui vous est proposé est destiné à améliorer votre santé. Aucune indemnité ne vous sera versée, mais votre participation à cette étude n'entraînera aucun coût supplémentaire à votre charge.

On ne sait pas actuellement si le fait de commencer les médicaments antirétroviraux plus tôt ou le fait de prendre une prophylaxie antituberculeuse en même temps (ou juste avant), sera mieux ou moins bon que d'attendre un peu pour débiter le traitement antirétroviral et de ne pas prendre de prophylaxie antituberculeuse (c'est à dire ce qu'on vous proposerait si vous ne participiez pas à l'étude)

Les principaux avantages possibles au fait de commencer plus tôt et au fait de prendre une prophylaxie antituberculeuse sont d'avoir moins de risque de maladies, et notamment moins de risque d'attraper la tuberculose. Les principaux inconvénients possibles, sont d'avoir plus d'effets indésirables dus aux médicaments.

Tant qu'on n'aura pas eu le résultat de l'étude, nous ne pouvons donc pas vous dire si ce qui aura été décidé pour vous par le tirage au sort se révélera plus ou moins efficace, et entraînera plus ou moins d'effets désagréables que ce que vous auriez eu si vous ne participiez pas à l'étude.

La seule chose qu'on peut dire est qu'en vous engageant dans cette étude :

- vous contribuerez à répondre à ces deux questions importantes, ce qui sera extrêmement utile à toutes les personnes infectées par le VIH en Afrique.
- vous aurez un suivi organisé et vous serez pris en charge par l'équipe qui s'occupe de cette étude pendant 30 mois, dans les conditions qu'on essaiera de rendre les meilleures possibles pour obtenir la meilleure efficacité possible et pour éviter au maximum les effets désagréables.

### **Délai de réflexion et volontariat**

Avant d'accepter ou non de participer à cette étude, nous vous conseillons de bien réfléchir.

**Nous vous rappelons notamment que si vous participez, vous pourrez être tiré au sort pour commencer un traitement dès maintenant. Si vous n'êtes pas prêt à suivre un traitement très sérieusement et régulièrement, nous vous conseillons de ne pas accepter.**

Vous pouvez dès maintenant poser toutes les questions complémentaires que vous souhaitez au médecin et à l'assistant(e) social(e) qui vous ont donné cette notice et qui vous ont parlé de l'essai. Ensuite, vous pourrez prendre du temps pour réfléchir. Nous allons vous proposer un rendez vous dans une à deux semaines, pour connaître votre décision.

Quand vous reviendrez pour nous donner votre réponse, vous serez totalement libre d'accepter ou de refuser de participer à l'étude.

Si vous refusez, cela n'aura aucune conséquence sur vos relations avec votre médecin et sur les soins qui vous seront donnés.

Si vous acceptez, il vous sera demandé de signer le « formulaire de consentement éclairé ». L'étude pourra alors commencer le jour même.

Même si vous commencez à participer à cette étude, vous aurez ensuite le droit à tout instant de revenir sur cette décision, sans donner de raison et sans altérer vos relations avec votre médecin. Cela veut dire que si vous vous retirez, vous aurez la possibilité, si vous le désirez, d'être suivis dans les mêmes conditions que les personnes qui restent dans l'étude.

### **Que va-t-il se passer en fin d'étude ?**

A la fin de l'étude, vous continuerez votre traitement antirétroviral et votre suivi médical dans le centre et avec les médecins de votre choix, selon les conditions de suivi du programme national de prise en charge définies par le Ministère de la Santé. Six mois avant votre sortie de l'essai, nous vous informerons des conditions exactes qui seront en cours à ce moment là. Actuellement, ces conditions sont les suivantes : pour un forfait de 1000 FCFA par mois, on a droit à un accès aux médicaments antirétroviraux et aux examens biologiques de contrôle du traitement (notamment les CD4).

A la fin de l'étude, vous serez également invité à une ou plusieurs réunions d'information sur les résultats, pour que vous puissiez connaître exactement la réponse aux questions qui étaient étudiées dans cette étude et auxquelles votre participation aura permis de répondre.

**Confidentialité, utilisation des résultats, et dispositions légales**

Cette étude a été autorisée par le Comité National d'Ethique des Sciences de la Vie et de la Santé et par le Ministre de la Santé et de l'Hygiène Publique de Côte d'Ivoire. Elle a également été approuvée par le Programme National de Prise en Charge des Personnes vivant avec le VIH, et par le Programme National de Lutte contre la Tuberculose.

Toutes les données vous concernant, c'est-à-dire les questionnaires remplis par le médecin et l'assistant(e) social(e) à chacune de vos visites, et les résultats de vos prises de sang, resteront confidentielles et ne pourront être consultées que par l'équipe médicale qui s'occupe de la recherche. Ces données seront informatisées et « anonymisées », c'est-à-dire que votre nom ne figurera dans aucun des documents papier et aucun des recueils informatiques renseignés pour l'essai.

Vous pouvez à tout moment demander à votre médecin les informations qui se trouvent dans votre dossier médical, y compris les informations recueillies dans le cadre de cet essai, et demander à ce que les informations qui s'y trouvent soient rectifiées si elles ne sont pas exactes.

## Formulaire de consentement de participation à

**« Bénéfices et risques d'un traitement antirétroviral précoce et d'une prophylaxie par 6 mois d'INH chez des adultes infectés par le VIH ayant entre 250 et 500 CD4/mm<sup>3</sup> à Abidjan, Côte d'Ivoire »**

### Essai Temprano ANRS 12136

Je soussigné, M ou Mme

Certifie que :

Le médecin désigné ci-dessous m'a proposé de participer à l'étude, selon ce qui est décrit dans la note d'information.

- J'ai lu cette note et je l'ai comprise
- On m'a lu cette note en français et je l'ai comprise
- On m'a traduit cette note et je l'ai comprise

J'en ai discuté avec ce médecin qui m'a expliqué les avantages et les inconvénients de cette étude.

J'ai notamment bien compris que je suis libre d'accepter ou de refuser cette proposition, et que si je m'engage dans cette étude, je pourrai ensuite changer d'avis et interrompre ma participation sans en être inquiété(e) et en continuant à bénéficier des mêmes conditions de traitement et de suivi.

J'accepte de participer à cette étude.

J'autorise que les données confidentielles qui me concernent soient consultées et analysées par les personnes qui collaborent à la recherche et qui sont tenues au secret médical.

Fait à Abidjan le

Signature

Je soussigné, Dr \_\_\_\_\_, certifie avoir expliqué à la personne susnommée l'intérêt et les modalités d'inclusion et de suivi dans notre projet de recherche. Je m'engage à faire respecter les termes de la notice d'information, les droits et libertés individuels ainsi que les exigences d'un travail scientifique.

Cette explication s'est faite :  exclusivement en français  
 par moi même, avec l'aide d'une autre langue  
 avec l'aide d'un traducteur, dans une autre langue

Date :

Signature :

## SOMMAIRE

|                                                                                |           |
|--------------------------------------------------------------------------------|-----------|
| <b>1. JUSTIFICATION .....</b>                                                  | <b>15</b> |
| 1.1. ETAT ACTUEL DES CONNAISSANCES .....                                       | 15        |
| 1.1.1. <i>tuberculose liee au vih en afrique sub-saharienne</i> .....          | 15        |
| 1.1.2. <i>chimio prophylaxie antituberculeuse</i> .....                        | 15        |
| 1.1.3. <i>debut du traitement arv en afrique sub-saharienne</i> .....          | 16        |
| 1.2. HYPOTHESES DE L'ESSAI .....                                               | 16        |
| 1.3. STRATEGIES DE L'ESSAI .....                                               | 17        |
| <b>2. OBJECTIFS .....</b>                                                      | <b>17</b> |
| 2.1. OBJECTIF PRINCIPAL .....                                                  | 17        |
| 2.2. OBJECTIFS SECONDAIRES .....                                               | 18        |
| <b>3. SCHEMA ET ECHEANCIER .....</b>                                           | <b>18</b> |
| 3.1. SCHEMA .....                                                              | 18        |
| 3.2. ECHEANCIER DE L'ESSAI .....                                               | 18        |
| <b>4. CENTRES PARTICIPANTS .....</b>                                           | <b>18</b> |
| 4.1. CENTRES DE SUIVI CLINIQUES .....                                          | 18        |
| 4.2. LABORATOIRE .....                                                         | 18        |
| 4.3. PRISE EN CHARGE DES PATIENTS .....                                        | 19        |
| <b>5. CRITERES D'ÉLIGIBILITE .....</b>                                         | <b>19</b> |
| 5.1. CRITERES D'INCLUSION .....                                                | 19        |
| 5.2. CRITERES DE NON INCLUSION .....                                           | 19        |
| <b>6. BRAS DE RANDOMISATION .....</b>                                          | <b>19</b> |
| <b>7. CRITERES DE JUGEMENT .....</b>                                           | <b>20</b> |
| 7.1. CRITERE DE JUGEMENT PRINCIPAL .....                                       | 20        |
| 7.2. CRITERES DE JUGEMENT SECONDAIRES .....                                    | 20        |
| <b>8. DEROULEMENT DE L'ESSAI .....</b>                                         | <b>21</b> |
| 8.1. VISITE DE PRE-INCLUSION .....                                             | 21        |
| 8.2. RECUEIL DU CONSENTEMENT, INCLUSION ET RANDOMISATION .....                 | 21        |
| 8.2.1. <i>Consentement</i> .....                                               | 21        |
| 8.2.2. <i>Randomisation</i> .....                                              | 22        |
| 8.3. TRAITEMENTS SYSTEMATIQUES .....                                           | 23        |
| 8.3.1. <i>Prophylaxie par le cotrimoxazole</i> .....                           | 23        |
| 8.3.2. <i>Prophylaxie par l'Isoniazide</i> .....                               | 23        |
| 8.3.3. <i>traitement antiretroviral</i> .....                                  | 23        |
| 8.4. VISITES ET BILANS SYSTEMATIQUES (J-8 A M-30) .....                        | 24        |
| 8.5. AUTRES VISITES, EXPLORATIONS COMPLEMENTAIRES ET TRAITEMENTS .....         | 25        |
| 8.6. FICHES EVENEMENTIELLES .....                                              | 26        |
| 8.7. DECLARATION DES EVENEMENTS MORBIDES .....                                 | 26        |
| 8.8. RETRAIT DE CONSENTEMENT, ABANDON, ARRET DE LA STRATEGIE, DEVIATIONS ..... | 27        |
| 8.8.1. <i>Retrait de consentement et abandon</i> .....                         | 27        |
| 8.8.2. <i>Arrêt prématuré et définitif de la stratégie de l'essai</i> .....    | 27        |

|            |                                                              |           |
|------------|--------------------------------------------------------------|-----------|
| 8.8.3.     | <i>perte de vue</i> .....                                    | 28        |
| 8.8.4.     | <i>Autres déviations</i> .....                               | 28        |
| 8.8.5.     | <i>consequences</i> .....                                    | 28        |
| <b>9.</b>  | <b>EVÉNEMENTS INDÉSIRABLES GRAVES</b> .....                  | <b>28</b> |
| 9.1.       | DEFINITION .....                                             | 28        |
| 9.2.       | NOTIFICATION .....                                           | 29        |
| 9.3.       | CONSEQUENCES POUR LES MEDICAMENTS DE L'ESSAI.....            | 30        |
| <b>10.</b> | <b>GROSSESSES ET NOUVEAUX NES</b> .....                      | <b>30</b> |
| 10.1.      | TRAITEMENTS PENDANT LA GROSSESSE ET L'ALAITEMENT .....       | 30        |
| 10.2.      | DECLARATION .....                                            | 30        |
| 10.3.      | ENFANTS NES DE MERES PARTICIPANT A L'ESSAI .....             | 30        |
| <b>11.</b> | <b>ANALYSES STATISTIQUES</b> .....                           | <b>31</b> |
| 11.1.      | METHODES STATISTIQUES .....                                  | 31        |
| 11.1.1.    | <i>Stratégies d'analyse</i> .....                            | 31        |
| 11.1.2.    | <i>Méthodes statistiques</i> .....                           | 32        |
| 11.1.3.    | <i>Logiciels</i> .....                                       | 32        |
| 11.2.      | CALCUL DU NOMBRE DE PARTICIPANTS NECESSAIRES .....           | 32        |
| 11.3.      | PLAN D'ANALYSE.....                                          | 33        |
| 11.3.1.    | <i>Description des inclusions et du suivi</i> .....          | 33        |
| 11.3.2.    | <i>Patients inclus dans l'analyse</i> .....                  | 33        |
| 11.3.3.    | <i>Caractéristiques des patients à M0</i> .....              | 33        |
| 11.3.4.    | <i>Critère de jugement principal</i> .....                   | 33        |
| 11.3.5.    | <i>Critères de jugement secondaires</i> .....                | 34        |
| 11.4.      | ANALYSE INTERMEDIAIRE .....                                  | 34        |
| <b>12.</b> | <b>SURVEILLANCE DE L'ESSAI</b> .....                         | <b>34</b> |
| 12.1.      | CONSEIL SCIENTIFIQUE.....                                    | 34        |
| 12.1.1.    | <i>Composition</i> .....                                     | 34        |
| 12.1.2.    | <i>Rythme des réunions</i> .....                             | 35        |
| 12.1.3.    | <i>Rôle</i> .....                                            | 35        |
| 12.2.      | COMITE INDEPENDANT DE SURVEILLANCE .....                     | 35        |
| 12.2.1.    | <i>Composition</i> .....                                     | 35        |
| 12.2.2.    | <i>Rythme des réunions</i> .....                             | 35        |
| 12.2.3.    | <i>Rôle</i> .....                                            | 36        |
| 12.3.      | COMITE DE VALIDATION DES EVENEMENTS .....                    | 36        |
| 12.3.1.    | <i>Composition</i> .....                                     | 36        |
| 12.3.2.    | <i>Rythme des réunions</i> .....                             | 36        |
| 12.3.3.    | <i>Rôle</i> .....                                            | 36        |
| <b>13.</b> | <b>ASPECTS ETHIQUES ET RÉGLEMENTAIRES</b> .....              | <b>36</b> |
| 13.1.      | CONFORMITE AUX TEXTES DE REFERENCE .....                     | 36        |
| 13.2.      | AMENDEMENT AU PROTOCOLE .....                                | 37        |
| 13.3.      | CONFIDENTIALITE DES DONNEES .....                            | 37        |
| 13.4.      | ASSURANCE ET PRISE EN CHARGE DES PARTICIPANTS .....          | 37        |
| 13.5.      | ARCHIVAGE ET STOCKAGE DES DOCUMENTS A LA FIN DE L'ETUDE..... | 37        |
| 13.6.      | ENREGISTREMENT DE L'ESSAI.....                               | 38        |
| <b>14.</b> | <b>MONITORAGE ET BONNES PRATIQUES CLINIQUES</b> .....        | <b>38</b> |
| 14.1.      | ORGANISATION GENERALE .....                                  | 38        |

|            |                                             |           |
|------------|---------------------------------------------|-----------|
| 14.2.      | CONSIGNES POUR LE RECUEIL DES DONNEES ..... | 38        |
| 14.3.      | MONITORAGE DES CENTRES INVESTIGATEURS.....  | 39        |
| 14.4.      | AUDIT - INSPECTION.....                     | 39        |
| <b>15.</b> | <b>PUBLICATION DES RESULTATS.....</b>       | <b>39</b> |
| <b>16.</b> | <b>BIBLIOGRAPHIE .....</b>                  | <b>40</b> |

## 1. JUSTIFICATION

### 1.1. ETAT ACTUEL DES CONNAISSANCES

#### 1.1.1. TUBERCULOSE LIEE AU VIH EN AFRIQUE SUB-SAHARIENNE

Bien avant l'ère des antirétroviraux, la tuberculose a été reconnue comme la première cause de mortalité chez les adultes infectés par le VIH en Afrique sub-Saharienne <sup>1</sup>.

Comparée à ce qu'on connaît chez les adultes VIH négatifs, la tuberculose de l'adulte VIH positif ne recevant pas d'antirétroviraux a deux grandes spécificités :

- un spectre clinique différent, caractérisé par une plus grande fréquence des localisations extra-pulmonaires, des formes à bacilloscopie négative, et des formes pulmonaires avec image radiologique atypique <sup>2-4</sup> ; ces caractéristiques entraînent mécaniquement une plus grande proportion de retard au diagnostic et au traitement et donc de décès avant traitement <sup>5</sup> ;
- une évolution sous traitement antituberculeux caractérisée par une plus grande mortalité <sup>2, 6</sup>, et en cas de guérison par une plus grande fréquence de récurrence de tuberculose active <sup>7</sup>.

La particularité de la tuberculose par rapport à la majorité des autres infections opportunistes sévères est de pouvoir survenir tôt dans l'évolution de la maladie VIH et donc d'être présente à tous les stades d'immunodépression. Même si son incidence est ensuite croissante avec l'immunodépression, on a pu démontrer que le risque de tuberculose dans la première année suivant la séroconversion VIH était déjà deux fois supérieur à celui des personnes séronégatives <sup>8</sup>.

Sous antirétroviraux, l'incidence de la tuberculose décroît avec la remontée des CD4 <sup>9</sup>. Néanmoins, même d'incidence réduite, la tuberculose active reste la première cause de morbidité sévère des adultes sous traitement antirétroviral en Afrique sub-Saharienne, au moins dans les 2-3 ans suivant la mise en route du traitement antirétroviral <sup>9, 10</sup>. Ceci pose alors les problèmes liés à l'association de deux traitements lourds - antirétroviral et antituberculeux -, notamment la toxicité cumulée <sup>11</sup>. En début de traitement antirétroviral chez une personne très immunodéprimée, la tuberculose active peut prendre la forme d'un syndrome de reconstitution immunitaire, pouvant poser des problèmes de diagnostic et de prise en charge et comportant un risque de décès plus grand <sup>12</sup>.

#### 1.1.2. CHIMIOPROPHYLAXIE ANTITUBERCULEUSE

Compte tenu de la fréquence et de la létalité de la tuberculose avant l'ère des antirétroviraux, très tôt il a été jugé intéressant d'étudier la possibilité de diminuer le risque de tuberculose active chez les adultes infectés par le VIH par la pratique d'une chimioprophylaxie primaire.

Dans la décennie 1990, la chimioprophylaxie antituberculeuse primaire a démontré son efficacité à réduire l'incidence de la tuberculose maladie chez les adultes infectés par le VIH ne recevant pas de traitement antirétroviral à travers un grand nombre d'essais randomisés, nombre d'entre eux en Afrique sub-Saharienne <sup>13,14-19</sup>. Ces essais étudiaient presque tous un régime de prophylaxie par 6 mois d'Isoniazide (INH) 300 mg/j en monothérapie. Certains comportaient également des régimes plus complexes mais plus courts : rifampicine (RMP)-INH 3 ou 4 mois, RMP-INH-pyrazinamide (PZA) 3 mois, RMP-PZA 2 mois. Lors d'une méta-analyse, le rapport des risques de tuberculose était de 0,58 (IC 95% [0,39-0,87]) chez les personnes ayant reçu la chimioprophylaxie par INH pendant 6 mois par rapport aux personnes n'ayant pas reçu de prophylaxie <sup>20</sup>. Les régimes autres que l'INH seul n'ont pas prouvé de bénéfice supplémentaire.

En 1999, sur la base de ces preuves solides, la prophylaxie primaire antituberculeuse par INH pendant six mois chez les adultes infectés par le VIH a été recommandée par l'OMS <sup>21</sup>, moyennant des pré-requis stricts, incluant l'intégration des services de prise en charge du VIH et de la tuberculose, la possibilité d'exclure une tuberculose active avant la mise sous prophylaxie, et l'affirmation de ce que la priorité d'un programme de lutte contre la tuberculose restait la détection et la prise en charge des cas de tuberculose maladie, et pas la pratique de la prophylaxie.

Moins étudiée, la chimioprophylaxie secondaire antituberculeuse par INH à durée indéfinie dans les suites d'un traitement curatif a montré un bénéfice pour réduire l'incidence de récurrence tuberculeuse dans trois études africaines <sup>22-24</sup>. Cette chimioprophylaxie secondaire n'a pas été officiellement recommandée par l'OMS.



Recommandées ou non, les deux types de chimioprophylaxie antituberculeuse, primaire et secondaire, ne sont pas appliquées sur le terrain, pour deux raisons principales :

- la crainte de ce que, appliquées chez des personnes ayant une tuberculose active non reconnue, ces interventions favorisent le développement de résistances aux antituberculeux ; cette crainte est d'autant plus justifiée que la durée de la prophylaxie est longue ; elle est également plus forte chez les personnes les plus immunodéprimées, l'immunodépression pouvant masquer ou rendre moins spécifiques les symptômes de tuberculose active<sup>25</sup> ;
- l'incertitude sur la conservation à long terme du bénéfice de la prophylaxie primaire chez les personnes ne recevant pas de traitement antirétroviral, le risque de réinfection tuberculeuse et de nouvelle tuberculose active augmentant avec l'immunodépression<sup>26,27</sup>.

### 1.1.3. DEBUT DU TRAITEMENT ARV EN AFRIQUE SUB-SAHARIENNE

Dans les recommandations OMS 2006, actuellement appliquées en Côte d'Ivoire, le début d'un traitement antirétroviral dans les pays en développement ayant accès à une mesure des CD4 est recommandé en présence d'un des trois critères suivants : (i) stade 4 de la classification clinique OMS ; ou (ii) CD4 < 200/mm<sup>3</sup> ; ou (iii) stade 3 OMS et CD4 entre 200 et 350/mm<sup>3</sup><sup>28,29</sup>.

Deux types d'arguments peuvent être invoqués pour un début de traitement antirétroviral plus précoce en Afrique sub-Saharienne :

- (i) Un taux de morbidité plus important en Afrique qu'en Europe, chez des patients en stade d'immunodépression modéré et non traité par antirétroviraux. Ceci s'explique par un spectre d'infection opportunistes dominé par la tuberculose, les maladies bactériennes invasives, et parfois le paludisme<sup>30,31</sup>. Ce spectre particulier explique en partie pourquoi la prophylaxie par le cotrimoxazole est recommandée plus tôt en Afrique sub-Saharienne que dans les pays industrialisés<sup>32</sup>.
- (ii) une morbidité sévère non négligeable en début de traitement antirétroviral chez les personnes qui débutent un traitement antirétroviral à un stade d'immunodépression modéré. Le tableau ci-dessous montre l'incidence de « tuberculose, maladies bactériennes sévères ou décès » chez les adultes inclus dans la phase pré-randomisation de l'essai Triyacan ANRS 1269, globalement et par strate de CD4, au moment de la mise sous antirétroviraux<sup>33</sup> :

|                             | N   | Tuberculose ou pathologie bactérienne sévère ou décès |      |                    |        |
|-----------------------------|-----|-------------------------------------------------------|------|--------------------|--------|
|                             |     | TAR                                                   | n    | Incidence /100 p-a | IC 95% |
| Ensemble des patients       | 658 | 62                                                    | 9,4  | 7,1-11,8           | 658    |
| Par groupes de CD4 initiaux |     |                                                       |      |                    |        |
| ≥ 350/mm <sup>3</sup>       | 103 | 7                                                     | 6,8  | 2,7-14,1           | 103    |
| 200-349/mm <sup>3</sup>     | 328 | 27                                                    | 8,2  | 5,4-12,0           | 328    |
| < 200/mm <sup>3</sup>       | 227 | 28                                                    | 12,3 | 8,2-17,8           | 227    |

N : nombre de patients inclus ; TAR : temps à risque (années); n = nombre de patients ayant eu au moins un des événements ; p-a : patient-années ; I.C. : Intervalle de Confiance

## 1.2. HYPOTHESES DE L'ESSAI

Les hypothèses s'appuient sur trois postulats :

- Le traitement ARV n'a pas rendu caduque la nécessité de prévenir la tuberculose par une chimioprophylaxie, bien au contraire :
  - (i) la survenue d'une tuberculose active dans les premiers mois d'un traitement antirétroviral chez l'adulte en Afrique sub-Saharienne pose suffisamment de problèmes pour qu'on ait encore envie de la prévenir, plutôt que d'avoir à la guérir ;
  - (ii) une chimioprophylaxie précédant de peu ou accompagnant le début d'un traitement antirétroviral conserverait des bénéfices à long terme, le risque de tuberculose sous traitement antirétroviral étant décroissant avec l'augmentation des CD4 ; c'est la grande différence avec une chimioprophylaxie appliquée avant l'ère des antirétroviraux, où la décroissance des CD4 exposait à des risques croissants de tuberculose après l'arrêt de la

chimioprophylaxie et donc à une inutilité à long terme d'une chimioprophylaxie limitée à six mois.

- Contrairement à ce qu'on pourrait penser, les personnes ayant une immunodépression sévère ne sont pas celles qui bénéficieraient le plus d'une chimioprophylaxie antituberculeuse, en raison de la plus grande difficulté d'éliminer chez eux une tuberculose active évoluant à bas bruit avant d'appliquer la chimioprophylaxie ; dans une perspective d'application à large échelle, la meilleure période pour appliquer une chimioprophylaxie sans risque est donc un stade d'immunodépression modéré ;
- En Afrique sub-Saharienne, on peut aussi se poser la question de savoir si au lieu de pratiquer une chimioprophylaxie antituberculeuse avant la mise sous antirétroviraux, il ne serait pas plus indiqué de débiter le traitement antirétroviral un peu plus tôt que recommandé actuellement. Ceci aurait comme principal intérêt potentiel un effet « prophylactique » contre la tuberculose, cette infection étant la principale infection opportuniste à un stade d'immunodépression intermédiaire.

Dans cet essai, on fait les hypothèses suivantes : (i) un début plus précoce du traitement antirétroviral que ce qui est actuellement recommandé en Côte d'Ivoire pourrait réduire significativement la probabilité de survenue de la tuberculose active ou du décès dans les 30 mois suivant ; (ii) six mois de chimioprophylaxie par isoniazide, appliquée peu avant ou en même temps que le début des antirétroviraux, réduirait également cette probabilité.

### 1.3. STRATÉGIES DE L'ESSAI

Les recommandations actuellement en cours en Côte d'Ivoire sont celles de l'OMS, c'est-à-dire de débiter un traitement antirétroviral chez l'adulte devant au moins un des critères suivant : (i)  $CD4 < 200/mm^3$ , (ii) stade clinique OMS 4 ; ou (iii) survenue d'une pathologie du stade 3 de la classification OMS et  $CD4$  entre 200 et  $350/mm^3$ .

Dans une population d'adultes infectés par le VIH ayant entre 250 et  $500 CD4/mm^3$  et n'ayant pas encore les critères nationaux de mise sous traitement antirétroviral mais susceptibles de débiter ce traitement dans les mois suivants, on testera l'efficacité de deux stratégies alternatives actuellement non recommandées :

- Une prophylaxie par isoniazide 300 mg/j en une prise le matin à jeun pendant 6 mois, débutée un mois après l'inclusion (M1);
- Un traitement antirétroviral débuté dès l'inclusion, sans attendre les critères nationaux de début des antirétroviraux.

On testera ensuite l'interaction entre ces deux stratégies, c'est à dire l'efficacité du « traitement antirétroviral dès l'inclusion » selon qu'on pratique ou non une chimioprophylaxie antituberculeuse dès l'inclusion.

Les régimes de traitement antirétroviral prescrits seront conformes aux recommandations nationales et internationales.

Les principaux effets indésirables de l'isoniazide en monothérapie sont l'hépatite médicamenteuse et la neuropathie des membres inférieurs. Sur la base des études antérieures de chimioprophylaxie antituberculeuse chez les adultes infectés par le VIH en Afrique sub-Saharienne<sup>14, 16, 17, 22-24, 26, 27</sup>, on s'attend à une faible incidence d'effets indésirables et à un rapport bénéfices/risques favorable. A noter qu'en Côte d'Ivoire la résistance à l'isoniazide, incluant mono- et multirésistance, est stable depuis plusieurs années, estimée par la surveillance nationale autours de 6%<sup>34</sup>.

## 2. OBJECTIFS

### 2.1. OBJECTIF PRINCIPAL

Comparer à 30 mois après la randomisation, chez des personnes adultes infectées par le VIH à Abidjan ayant entre 250 et  $500 CD4/mm^3$  et pas de critère de mise en route immédiate d'un traitement antirétroviral, l'efficacité : (i) de la stratégie actuelle consistant à attendre la survenue des critères nationaux pour mettre en route le traitement antirétroviral avec celle de la mise en route immédiate du traitement antirétroviral sans attendre les critères nationaux, et (ii) d'une prophylaxie de six mois par isoniazide 300 mg/jour par rapport à l'absence de chimioprophylaxie antituberculeuse.

L'efficacité des stratégies nouvelles sera comparée à celle de la stratégie actuelle en terme de probabilité de survenue de tuberculose active ou du décès.

## 2.2. OBJECTIFS SECONDAIRES

Comparer entre les stratégies étudiées la probabilité de survenue à 30 mois après la randomisation :

- des effets secondaires médicamenteux de grade 3 ou 4 selon la gradation de l'ANRS.
- des événements cliniques de stade 3 ou 4 de la classification en stades cliniques de l'OMS <sup>35</sup>.

## 3. SCHEMA ET ECHEANCIER

### 3.1. SCHÉMA

Essai thérapeutique multicentrique comparatif, de supériorité, randomisé, sans insu sur le traitement. Le schéma d'étude est un plan factoriel 2\*2. La répartition du nombre de patients dans les bras est équilibrée.

### 3.2. ECHÉANCIER DE L'ESSAI

- Période d'inclusion : 18 mois
- Durée de participation par personne : 30 mois
- Durée de l'essai: 48 mois

## 4. CENTRES PARTICIPANTS

### 4.1. CENTRES DE SUIVI CLINIQUES

Les centres cliniques dans lesquels seront inclus et suivis les participants sont :

- Le centre de prise en charge, de recherche et de formation (CePReF), FSU de Yopougon
- Le Centre Intégré de Recherche Bioclinique d'Abidjan (CIRBA)
- Le Service des Maladies Infectieuses et Tropicales (SMIT), CHU de Treichville
- L'Unité de Soins Ambulatoires et de Conseil (USAC), CHU de Treichville
- Le Centre de suivi des donneurs de sang du Centre National de Transfusion Sanguine (CNTS) d'Abidjan.

Ces 5 centres suivent actuellement plus de 10000 personnes adultes sous traitement antirétroviral. Au premier trimestre 2007, le rythme de début de traitements antirétroviraux de l'adulte dans ces centres était de 1000 par mois.

### 4.2. LABORATOIRE

Le laboratoire de microbiologie assurant la totalité des examens biologiques pour les personnes incluses dans l'essai sera le CeDReS, centre de diagnostic et de recherches sur le SIDA (CHU de Treichville).

Ce laboratoire est le laboratoire de référence du site ANRS d'Abidjan depuis 1993. Il dispose de matériel et de techniciens expérimentés pour :

- la recherche de mycobactéries à l'examen direct (immunofluorescence à l'auramine), la culture classique (milieu de Lowenstein-Jensen), la culture rapide automatisée et les antimycobactériogrammes en milieu liquide sur BacT/ALERT® 3D (MB/BacT 240) ; l'appareil dispose de 240 places et permet 20 cultures par jour ;
- la conservation des souches de mycobactéries dans une souchothèque ;
- la mesure des CD4 (Technique TrueCount® sur Facscan®) et de la charge virale plasmatique VIH-1 (PCR en temps réel) <sup>36</sup> ;
- les tests génotypiques de résistance du VIH-1. Les définition de résistance seront conformes à la liste de l'IAS-USA ([www.iasusa.org/resistance\\_mutations/index.html](http://www.iasusa.org/resistance_mutations/index.html)). Les profils de résistance seront interprétés conformément à l'algorithme de l'ANRS ([www.hivfrenchresistance.org](http://www.hivfrenchresistance.org)).

Le laboratoire du CeDReS est inscrit à un programme international de contrôle de qualité de la mesure des CD4 (UK-NEQAS, QASI et SANEQUAS). Le contrôle de qualité des analyses de mycobactériologie effectuées au CeDReS sera assuré conjointement par l'Institut Pasteur de Côte d'Ivoire, laboratoire national ivoirien de référence pour la mycobactériologie, et par le laboratoire de mycobactériologie de l'hôpital de la Pitié Salpêtrière à Paris, laboratoire national français de référence des mycobactéries. Le contrôle de qualité

de la mesure de la charge virale ARN VIH-1 plasmatique et des tests génotypiques de résistance sera effectué par le laboratoire de virologie de l'hôpital Necker à Paris.

### 4.3. PRISE EN CHARGE DES PATIENTS

La participation à l'essai sera proposée à tous les adultes se présentant en consultation dans un des centres participants et ayant les critères d'éligibilité définis au paragraphe 5.

Dans ces centres, toutes les personnes mises sous traitement bénéficient d'une prise en charge subventionnée depuis 2004 par le fond mondial de lutte contre le SIDA, la tuberculose et le paludisme et le PEPFAR, et garantie par le programme national de prise en charge des personnes infectées par le VIH dépendant du Ministère de la Santé de Côte d'Ivoire.

Dans le cadre de cette subvention :

- Les mesures de CD4, de NFS, transaminases et de charge virale sont gratuites, à condition de s'inscrire dans le cadre des recommandations nationales : mesure initiale des transaminases, créatininémie, NFS et CD4, puis mesure semestrielle systématique de NFS et CD4, et mesure de la charge virale VIH-1 plasmatique aux 12<sup>ème</sup>, 18<sup>ème</sup> et 24<sup>ème</sup> mois de traitement antirétroviral en cas d'échec immunologique ;
- Le traitement antirétroviral est facturé au patient 1000 francs CFA par mois, quel que soit le régime prescrit, à condition qu'il rentre dans le cadre des algorithmes nationaux.

Les personnes participant à cet essai continueront à bénéficier de cette prise en charge nationale après la fin de l'essai. Le budget de l'essai prendra en charge les médicaments antirétroviraux et non antirétroviraux, les examens complémentaires, les hospitalisations et les frais de transport, pour assurer aux participants une gratuité totale des soins.

## 5. CRITERES D'ÉLIGIBILITE

### 5.1. CRITÈRES D'INCLUSION

- Sérologie VIH-1 positive ou VIH-1+VIH-2 positive
- Age  $\geq$  18 ans
- Nadir de CD4  $\geq$  350/mm<sup>3</sup> et  $\leq$  500/mm<sup>3</sup> et stade clinique OMS 1, 2 ou 3, OU nadir de CD4  $\geq$  250/mm<sup>3</sup> et  $<$ 350/mm<sup>3</sup> et stade OMS 1<sup>35</sup>
- Absence de tuberculose active en cours
- Résidence dans une des communes de l'agglomération d'Abidjan
- Consentement libre, éclairé et écrit, signé avant tout examen nécessité par l'essai

### 5.2. CRITÈRES DE NON INCLUSION

- Femmes enceintes ou allaitant
- Sérologie positive pour le VIH-2 seul
- Signes cliniques compatibles avec une des pathologies classant aux stades 3 ou 4 de la classification en stade clinique de l'OMS dont le diagnostic ne serait pas encore affirmé - tels que fièvre, amaigrissement, diarrhée ou toux non encore expliquée (liste non exhaustive).
- Multithérapie antirétrovirale débutée auparavant.
- Insuffisance rénale, cardiaque ou hépatique sévère connues.

## 6. BRAS DE RANDOMISATION

L'étude compare deux stratégies alternatives : « prophylaxie antituberculeuse » à « pas de prophylaxie antituberculeuse », et « traitement antirétroviral plus précoce que le stade actuellement recommandé par l'OMS et par la Côte d'Ivoire » à « traitement antirétroviral débuté au stade actuellement recommandé par l'OMS et par la Côte d'Ivoire », avec recherche d'interactions entre les deux stratégies alternatives.

Ceci implique de randomiser les personnes en 4 bras, qui seront analysés en plan factoriel 2\*2 :

### - Bras 1 : *Stratégie nationale*

- Début d'un traitement antirétroviral à n'importe quel moment du suivi dans l'essai si au moins un des critères suivants est présent : (i) CD4  $<$  200/mm<sup>3</sup> ; (ii) survenue d'une maladie opportuniste du stade

4 de la classification en stades cliniques de l'OMS ; (iii) survenue d'une maladie opportuniste du stade 3 de la classification en stades cliniques de l'OMS et CD4 entre 200 et 350/mm<sup>3</sup>.

**- Bras 2 : Isoniazide précoce**

- Isoniazide 300 mg : 1 comprimé par jour le matin à jeun débuté un mois après la randomisation (M1) et poursuivi 6 mois
- Début d'un traitement antirétroviral à n'importe quel moment du suivi dans l'essai si au moins un des critères suivants est présent : (i) CD4 < 200/mm<sup>3</sup> ; (ii) survenue d'une maladie opportuniste du stade 4 de la classification en stades cliniques de l'OMS ; (iii) survenue d'une maladie opportuniste du stade 3 de la classification en stades cliniques de l'OMS et CD4 entre 200 et 350/mm<sup>3</sup>.

**- Bras 3 : Traitement antirétroviral précoce**

- Début d'un traitement antirétroviral le jour de la randomisation (M0) sans attendre la présence des critères nationaux et internationaux.

**- Bras 4 : Isoniazide précoce et traitement antirétroviral précoce**

- Isoniazide 300 mg : 1 comprimé par jour le matin à jeun un mois après la randomisation (M1) et poursuivi 6 mois
- Début d'un traitement antirétroviral le jour de la randomisation (M0) sans attendre la présence des critères nationaux et internationaux.

## 7. CRITERES DE JUGEMENT

### 7.1. CRITÈRE DE JUGEMENT PRINCIPAL

Le critère de jugement principal est la probabilité de survenue du décès ou d'un épisode de « tuberculose active » (certaine, probable ou possible).

L'existence d'une tuberculose active sera affirmée par le comité de validation des événements morbides, sur la présence dans le dossier médical des critères suivants :

*- Tuberculose certaine :*

- Observation clinique compatible, ET:
  - identification de *Mycobacterium tuberculosis* (*M. tuberculosis*), *M bovis* ou *M africanum* sur un prélèvement d'expectoration ou d'autres liquides ou tissus extra-pulmonaires ;
  - OU aspect caractéristique caséeux d'un prélèvement histologique.

*- Tuberculose probable :*

- Observation clinique compatible,
- ET mise en évidence de bacilles acido-alcool-résistants (ou aspect caractéristique en immunofluorescence) sur un prélèvement d'expectoration et d'autres liquides ou tissus extra-pulmonaires ; OU aspect caractéristique granulomateux d'un prélèvement histologique
- ET évolution favorable sous traitement antituberculeux spécifique.

*- Tuberculose possible :*

- Tableau clinique compatible > 30 jours ;
- ET absence d'évolution favorable sous traitement antibiotique non spécifique à large spectre ;
- ET évolution favorable sous traitement antituberculeux spécifique.

### 7.2. CRITÈRES DE JUGEMENT SECONDAIRES

Les critères de jugement secondaires sont :

- (i) la probabilité de survenue des événements cliniques classant pour les stades 3 ou 4 de la classification en stades cliniques de l'OMS <sup>35</sup> (annexe 1) ;
- (i) la probabilité de survenue des effets secondaires cliniques ou biologiques de grade 3 ou 4, selon l'échelle de gravité de l'ANRS (annexe 2) ;

- (ii) l'évolution immunologique et virologique. Les méthodes utilisées pour ce critère feront l'objet d'un protocole complémentaire ;
- (iii) l'observance aux traitements. Les méthodes utilisées pour ce critère feront l'objet d'un protocole complémentaire ;
- (iv) l'analyse économique de type coût-efficacité et coût bénéfique des stratégies à moyen et long terme. Les analyses utiliseront le modèle préalablement conçu dans le cadre de la collaboration entre l'équipe du site ANRS d'Abidjan et la Harvard School of Medicine avec co-financement par l'ANRS et le NIH pour les essais Cotrimo-CI et Trivacan<sup>37,38</sup>. Les méthodes utilisées pour ce critère feront l'objet d'un protocole complémentaire ;
- (v) la qualité de vie. Les méthodes utilisées pour ce critère feront l'objet d'un protocole complémentaire.

## 8. DEROULEMENT DE L'ESSAI

### 8.1. VISITE DE PRE-INCLUSION

La visite de pré inclusion (PI) sera assurée par le médecin investigateur, ou par un médecin qui le représente, et par l'assistant(e) sociale(e).

Cette visite s'appliquera à toutes les personnes suivies dans un des cinq centres et remplissant les critères d'éligibilité listés au paragraphe 5.1.

*Pour le critère CD4 entre 250 et 500/mm<sup>3</sup>*, seuls seront pris en compte les mesures de CD4 réalisées dans les deux mois précédents la pré-inclusion dans un des laboratoires suivants : CeDReS, CIRBA, Retro-CI ou du CEPREF.

*Pour le critère « absence de tuberculose active en cours »*, des réunions de formation seront organisées en collaboration avec les investigateurs avant le début de l'essai. En pratique, l'absence de tuberculose active en cours impliquera l'absence totale de signes généraux inexplicables, incluant (mais pas seulement) l'absence de fièvre, d'amaigrissement, de toux, de douleurs thoraciques ou d'expectoration. A cette occasion on facilitera la pratique dans les centres de suivi du dépistage standardisé de la tuberculose par examens directs et cultures des prélèvements appropriés, radiographie du thorax et toute autre imagerie appropriée.

Si les critères de pré-inclusion sont remplis, le médecin et l'assistant(e) sociale(e) informeront la personne de l'objectif, de la nature, des contraintes et des risques prévisibles de l'essai et répondront à toutes les questions. La note d'information écrite servira de support à la discussion. On insistera particulièrement sur le conseil à l'observance et l'importance d'une observance parfaite dès le début du traitement antirétroviral. La personne sera invitée à réfléchir puis à revenir une à deux semaines plus tard (ou plus, sans dépasser trois mois après le dernier chiffre de CD4) soit pour la visite d'inclusion si elle désire être incluse, soit pour des renseignements complémentaires si elle désire plus d'information avant de prendre sa décision.

A l'issue de la visite de pré-inclusion, la « *fiche d'évaluation de la compréhension* » sera remplie par l'assistant(e) social(e), et la « *fiche de pré-inclusion* » sera remplie par l'investigateur. Ces fiches seront transmises le jour même au centre de coordination de l'essai d'Abidjan. Elles comporteront un numéro d'identification et d'anonymisation unique, composé d'une lettre identifiant le centre et d'un numéro séquentiel. Ce numéro sera reporté par le médecin sur la seconde page de couverture du carnet de santé.

### 8.2. RECUEIL DU CONSENTEMENT, INCLUSION ET RANDOMISATION

Si une personne pré-incluse revient et ne désire pas être incluse, ou ne peut plus être incluse en raison de l'apparition dans l'intervalle de critères de non inclusion, le médecin remplira une « *fiche de non inclusion* ».

L'inclusion et la randomisation se feront le même jour. L'inclusion/randomisation devra se faire dans les trois mois suivant la dernière mesure connue de CD4. Si ce délai est dépassé, soit parce que la personne l'a souhaité, soit parce que des critères temporaires de non inclusion sont apparus dans l'intervalle, une nouvelle mesure de CD4 devra être réalisée.

#### 8.2.1. CONSENTEMENT

Le jour de l'inclusion/randomisation dans l'essai (visite M0), le médecin investigateur ou un médecin qui le représente sera responsable :

- De la vérification de la présence de tous les critères d'inclusion ;
- De l'obtention du consentement écrit. Le consentement devra être signé avant la réalisation de tout examen clinique ou para-clinique spécifique à l'essai. Si la personne donne son accord de participation, elle même et l'investigateur inscriront leurs noms et prénoms en clair, dateront et signeront le formulaire de consentement. L'exemplaire original sera conservé dans le centre de suivi dans un lieu sûr inaccessible à des tiers, puis remis en main propre chaque semaine au moniteur à l'occasion de la visite de monitoring hebdomadaire. Le Moniteur le transportera au centre de coordination de l'essai, où il sera conservé dans un lieu sûr inaccessible à des tiers. A la fin des inclusions, ou au plus tard à la fin de l'essai, les formulaires de consentement seront transmis à l'ANRS ou à son représentant selon des modalités communiquées en temps utile par l'ANRS aux investigateurs.

Tout amendement qui modifiera significativement la prise en charge des patients et les procédures de l'essai telles qu'exposées dans la note d'information originale fera l'objet d'une nouvelle note d'information et d'un nouveau formulaire de consentement dont le recueil suivra la même procédure que celle précitée.

### **8.2.2. RANDOMISATION**

Après recueil du consentement, la personne sera randomisée dans une des quatre stratégies.

La liste de randomisation aura été préalablement établie par la statisticienne du Centre de Méthodologie et de Gestion de Bordeaux avant le début de l'essai. Les effectifs des 4 groupes de stratégie seront équilibrés. La randomisation sera stratifiée sur le centre de suivi.

La randomisation des patients sera effectuée de façon centralisée au centre de coordination de l'essai à Abidjan où sera organisée une permanence téléphonique.

Lorsqu'un investigateur ou le médecin le représentant disposera de tous les résultats nécessaires à l'inclusion de la personne dans l'essai et souhaitera demander la randomisation, il téléphonera au centre de coordination de l'essai à Abidjan où le moniteur affectera le patient à un groupe de traitement et à un numéro d'inclusion, à l'aide du logiciel contenant la liste de randomisation pré-établie. Il communiquera le bras et le numéro d'inclusion par téléphone au médecin investigateur, qui le notera sur la « *fiche d'inclusion* ». Dans les 48 heures, le centre de coordination adressera au centre investigateur une confirmation écrite du numéro d'inclusion et du bras de randomisation, signée par le moniteur. Cette confirmation sera rangée dans le classeur d'observation.

A l'issue de la visite d'inclusion, la « *fiche d'évaluation psycho-sociale* » sera remplie par l'Assistant(e) Social(e) ; de plus, l'investigateur :

- Complètera, avec l'aide de l'assistant(e) social(e), la « *fiche d'inclusion* », transportée le jour même au centre de coordination de l'essai d'Abidjan. Cette fiche comportera le numéro d'inclusion unique, composé de deux lettres identifiant le centre et d'un numéro séquentiel. Ce numéro sera reporté par le médecin sur la seconde page de couverture du carnet de santé. Il servira à identifier toutes les ordonnances et tous les éléments du cahier d'observation jusqu'à la fin de l'essai ;
- Remettra à la personne :
  - l'ordonnance de prescription du premier mois de traitement correspondant au bras dans lequel elle a été randomisée ;
  - l'ordonnance de prescription du bilan d'inclusion : les échantillons seront prélevés immédiatement dans le centre de l'essai, et acheminés en fin de matinée au laboratoire du CeDReS ;
  - L'ordonnance de radiologie pulmonaire d'inclusion : celle-ci devra être réalisée dans les 48 heures, dans un centre de radiologie dont les coordonnées seront données à la personne. Cette radiologie sera pratiquée à titre systématique, chez des personnes pour lesquelles le diagnostic de tuberculose active aura été éliminé auparavant. Son objectif sera de servir d'élément de comparaison pour les images radiologiques ultérieurement constatées pendant l'essai chez des personnes qui seront devenues symptomatiques. .
- Planifiera la visite du huitième jour (« J8 ») pour les personnes ayant débuté le traitement ARV le jour de l'inclusion et la visite du premier mois (« M1 ») pour les autres personnes.

## 8.3. TRAITEMENTS SYSTEMATIQUES

### 8.3.1. PROPHYLAXIE PAR LE COTRIMOXAZOLE

La prophylaxie par le cotrimoxazole sera prescrite dès le jour de l'inclusion pour toute personne qui n'a pas de contre indication formelle aux sulfamides, et ceci jusqu'à la fin de l'essai, sauf effet secondaire grave, sauf évolution ultérieure des règles d'interruption de la prophylaxie par le cotrimoxazole en Afrique chez les adultes sous traitement antirétroviral, et sauf procédure complémentaire établissant d'autres règles d'arrêt de la prophylaxie.

### 8.3.2. PROPHYLAXIE PAR L'ISONIAZIDE

L'isoniazide sera prescrit selon les stratégies listées au paragraphe 6. Les personnes ayant été randomisées dans les bras avec prophylaxie par isoniazide (bras 2 et 4) débuteront les six mois de prophylaxie le jour de la visite M1, à condition de remplir les deux critères suivants :

- Absence de signe évocateur de tuberculose active lors de cette visite M1 ;
- Transaminases sériques < 2,5 x valeur supérieure de la normale lors du bilan d'inclusion.

Si un de ces deux critères est absent, on renoncera à prescrire la prophylaxie par isoniazide pendant toute la durée de l'essai.

Pour toutes les personnes randomisées dans les bras avec prophylaxie par isoniazide (bras 2 et 4), que l'isoniazide ait été débuté ou non, le médecin remplira à M1 la « *fiche chimioprophylaxie par INH* » pour déclarer la mise sous INH ou au contraire déclarer l'absence de mise sous INH et les raisons de ce choix.

### 8.3.3. TRAITEMENT ANTIRETROVIRAL

#### 8.3.3-1 Régimes de première intention

Le traitement antirétroviral sera prescrit selon les stratégies listées au paragraphe 6.

Actuellement, la Côte d'Ivoire préconise en première intention un régime composé de deux inhibiteurs nucléos(t)idiques de la transcriptase inverse (INTI) et d'un inhibiteur non nucléosidique de la transcriptase inverse (INNTI). Chez les personnes ne pouvant pas recevoir d'inhibiteurs non nucléosidiques, l'alternative privilégiée est une antiprotéase boostée par ritonavir. Les dernières recommandations de l'OMS, renforcées par des publications récentes, suggèrent que certaines associations choisies de trois nucléos(t)idiques pourraient représenter une alternative de première ligne intéressante aux régimes comprenant des antiprotéases pour les personnes ne pouvant pas recevoir d'INNTI en Afrique sub-Saharienne. Cette option trois nucléos(t)idiques n'est cependant probablement pas souhaitable chez les personnes débutant le traitement en stade avancé<sup>(29, 39-42)</sup>.

Dans cette optique, on utilisera les régimes de première intention suivant :

- (i) ténofovir-emtricitabine-efavirenz pour les hommes infectés par le VIH-1 seul, ou pour les femmes infectées par le VIH-1 seul remplissant les deux conditions suivantes : contraception efficace effective, et absence d'antécédent de prophylaxie de la transmission du VIH de la mère à l'enfant par un régime contenant de la névirapine ;
- (ii) ténofovir-emtricitabine-lopinavir/ritonavir ou ténofovir-emtricitabine-zidovudine pour les femmes ne prenant pas de contraception et/ou ayant un antécédent de prophylaxie de la transmission du VIH de la mère à l'enfant par un régime contenant de la névirapine, et pour les personnes co-infectées par les VIH 1 et 2. Dans ce cadre :
  - Le régime ténofovir-emtricitabine-zidovudine sera prescrit aux personnes pratiquant un début précoce des antirétroviraux (bras 3 et 4) ;
  - Le régime ténofovir-emtricitabine-lopinavir/ritonavir sera prescrit aux personnes pratiquant un début des antirétroviraux selon les recommandations OMS et nationales (bras 1 et 2).

Pour les personnes des bras 1 et 2, la mise en route du traitement ARV au cours du suivi et sa justification sera déclarée par le remplissage d'une « *fiche de début ou modification du traitement ARV* ».



### **8.3.3-2 Régimes ultérieurs**

Une attention particulière sera portée à la survenue des acidoses lactiques, hépatites, et insuffisances rénales. Les effets indésirables graves donneront lieu à une déclaration et le cas échéant à une modification de traitement tel que décrit au paragraphe 9.

En cas d'intolérance nécessitant une modification de régime, les régimes alternatifs seront choisis chaque fois que possible parmi les 3 régimes de première intention listés au paragraphe antérieur (remplacement de ténofovir-emtricitabine-efavirenz par ténofovir-emtricitabine-lopinavir/ritonavir, remplacement de ténofovir-emtricitabine-zidovudine par ténofovir-emtricitabine-lopinavir/ritonavir).

En cas d'échec thérapeutique nécessitant une modification de régime, le régime envisagé en priorité chez les personnes sous ténofovir-emtricitabine-efavirenz et sous ténofovir-emtricitabine-zidovudine sera l'association didanosine-abacavir-lopinavir/ritonavir ou l'association zidovudine-lamivudine-lopinavir/ritonavir.

En cas de dégradation de la fonction rénale non imputable au ténofovir, le traitement par l'association ténofovir-emtricitabine pourra être poursuivi moyennant une adaptation de la posologie à la clairance de la créatinine si celle-ci est comprise entre 30 et 50 mL/min. En dessous de 30 mL/min, le ténofovir sera interrompu.

Pour les personnes avec Ag HBs plasmatique et devant interrompre l'association ténofovir-emtricitabine, quel soit le régime de remplacement choisi et y compris si ce régime contient de la lamivudine, une surveillance clinique et une surveillance des transaminases sera pratiquée mensuellement pendant les trois mois suivant la modification de régime.

### **8.3.3-3 Provenances des antirétroviraux**

Les antirétroviraux seront :

- Soit délivrés gratuitement par la Pharmacie de Santé Publique de Côte d'Ivoire. Le Ministère de la Santé et de l'Hygiène Publique de Côte d'Ivoire s'est engagé à ce que les personnes participant à cet essai bénéficient des mêmes conditions d'accès aux antirétroviraux que toute personne infectée par le VIH en Côte d'Ivoire.
- Soit fournis gratuitement par les firmes pharmaceutiques. Les laboratoires Gilead Sciences et Merck & Co ont été sollicités pour une fourniture gratuite de ténofovir-emtricitabine et d'efavirenz et ont donné un accord de principe, qui sera formalisé par contrat entre ces firmes et l'ANRS.

Le Ministre de la Santé et de l'Hygiène Publique de Côte d'Ivoire s'est engagé à ce que les molécules utilisées pendant l'essai soient disponibles pour les participants lorsqu'ils sortiront de l'essai, dans le cadre de leur suivi ultérieur par le programme national.

## **8.4. VISITES ET BILANS SYSTEMATIQUES (J-8 A M-30)**

La personne participante sera systématiquement revue par le médecin investigateur ou par un médecin qui le représente tous les mois pendant les trois premiers mois (M1, M2, M3), puis tous les trois mois par la suite (M6, M9, M12, M15, M18, M21, M24, M27 et M30). Pour les personnes des bras avec traitement ARV selon la stratégie OMS et nationale (bras 1 et 2), des visites supplémentaires seront systématiquement programmées un mois, deux mois, et trois mois après le début du traitement antirétroviral, quelle que soit la date de début de ce traitement, puis le rythme trimestriel sera de nouveau appliqué après le 3<sup>ème</sup> mois suivant le début des ARV.

Un contact sera également systématiquement proposé :

- Huit jours après le début du traitement antirétroviral (visite J8), pour discuter des effets secondaires et renforcer les conseils à l'observance. Au cours de cette visite, les personnes seront reçues par le médecin ;
- Un mois après chaque bilan systématique semestriel (soit à M7, M13, M19, et M25), pour déterminer si les résultats des mesures de CD4 et de charge virale impliquent une décision en terme de début ou de modification du traitement ARV. Pour ce contact, il sera demandé à la personne soit de téléphoner au technicien d'étude clinique, soit de passer au centre de suivi. Une liste des personnes dont les résultats du bilan semestriel indiquent la nécessité d'un contact avec le médecin aura été préalablement établie par le centre de monitoring. Le technicien d'étude clinique se basera sur cette liste pour indiquer à la personne qu'aucune visite supplémentaire n'est prévue jusqu'à la prochaine visite programmée, ou au

contraire pour lui demander de venir voir le médecin en consultation pour une décision concernant son traitement.

A l'issue de chaque visite systématique listée dans ce paragraphe, l'investigateur remplira la « *fiche de suivi systématique* » identifiée par la date du jour et le numéro du mois correspondant. A M12, M24 et M30, l'investigateur remplira également une « *fiche lipodystrophie* » après examen clinique spécifique à la recherche de lipodystrophie.

**Tableau récapitulatif du suivi et des examens protocolaires**

|                                                         | Pré-requis<br>dans les 2<br>mois<br>précédant la<br>PI | Pré-<br>inclusion<br>(PI) | Inclusion<br>M0 | J8  | M1<br>M2<br>M3<br>M9<br>M15<br>M21<br>M27 | M6<br>M12<br>M18<br>M24 | M30 |
|---------------------------------------------------------|--------------------------------------------------------|---------------------------|-----------------|-----|-------------------------------------------|-------------------------|-----|
| Lecture et discussion de l'information                  |                                                        | x                         | x               |     |                                           |                         |     |
| Signature du consentement                               |                                                        |                           | x               |     |                                           |                         |     |
| Examen clinique standard <sup>(1)</sup>                 | x                                                      | x                         | x               | x   | x                                         | x                       | x   |
| Examen clinique « lipodystrophie »                      |                                                        |                           | x               |     |                                           | °                       | x   |
| Radiographie du thorax                                  | (x)                                                    |                           | x               | (x) | (x)                                       | (x)                     | x   |
| Recherche de Mycobactéries                              | (x)                                                    |                           |                 | (x) | (x)                                       | (x)                     | (x) |
| NFS-CD4                                                 | x                                                      |                           | x               |     |                                           | x                       | x   |
| Sérologie VIH                                           | x                                                      |                           | x               |     |                                           |                         |     |
| Ag HBS plasmatique                                      |                                                        |                           | x               |     |                                           |                         |     |
| Ac HBc, Ac HBs plasmatiques <sup>(2)</sup>              |                                                        |                           | (xx)            |     |                                           |                         |     |
| Charge virale VHB plasmatique <sup>(3)</sup>            |                                                        |                           | (xx)            |     |                                           | (xx)                    |     |
| Ag HBe Ac HBe plasmatiques <sup>(4)</sup>               |                                                        |                           | (xx)            |     |                                           |                         |     |
| Transaminasémie et créatininémie <sup>(5)</sup>         |                                                        |                           | x               |     |                                           | x                       | x   |
| Cholestérol, triglycérides sériques                     |                                                        |                           | x               |     |                                           |                         | x   |
| Sérologie TB et test interféron $\gamma$ <sup>(6)</sup> |                                                        |                           | x               |     |                                           | (xx)                    |     |
| ARN VIH-1 plasmatique                                   |                                                        |                           | x               |     |                                           | x                       | x † |
| ADN VIH-1 PBMCs                                         |                                                        |                           | (xx)            |     |                                           |                         |     |
| Sérothèque-plasmathèque                                 |                                                        |                           | x               |     |                                           | x                       | x   |
| Cellulothèque                                           |                                                        |                           | x               |     |                                           | °                       | x   |
| Electrophorèse de l'hémoglobine                         |                                                        |                           | x               |     |                                           |                         |     |

<sup>(1)</sup> incluant mesure de la pression artérielle et de l'indice de masse corporelle

<sup>(2)</sup> chez les personnes avec Ag HBs plasmatique négatif

<sup>(3)</sup> chez les personnes avec Ag HBs plasmatique positif ou Ac HBc positif et Ac HBs négatif

<sup>(4)</sup> chez les personnes avec Ag HBs plasmatique positif

<sup>(5)</sup> avec mesure systématique de la clairance de la créatinine

<sup>(6)</sup> voir références 43 et 44

J8 : 8<sup>ème</sup> jour après le début des ARV

(x) pour toute personne présentant des signes compatibles avec une tuberculose active

(xx) sous réserve de financements complémentaires

° à M12 et M24

† en cas de charge virale VIH-1 détectable : tests génotypiques de résistance

## 8.5. AUTRES VISITES, EXPLORATIONS COMPLEMENTAIRES ET TRAITEMENTS

Les personnes incluses auront accès à toute heure ouvrable à un contact médical dans leur centre de suivi en cas de problème morbide. La prise en charge se fera en consultation, en hospitalisation de jour (donnant

lieu au remplissage d'une « *fiche d'Hospitalisation de jour* »), ou en hospitalisation classique (donnant lieu au remplissage d'une « *fiche d'Hospitalisation classique* »), selon le degré de gravité, en suivant les procédures d'exploration et de prise en charge adaptées de celles préalablement utilisées dans les essais Cotrimo-CI ANRS 059 et Trivacan ANRS 1269. Ces procédures prévoient notamment :

- (i) Des recherches répétées de mycobactéries dans les prélèvements appropriés (crachats, sang, liquide pleural, liquide péritonéal, pus ganglionnaire, LCR, ponction médullaire et selles) devant toute symptomatologie sévère ou prolongée inexpliquée avec signes généraux. L'examen direct sera systématiquement suivi de cultures.
- (ii) Des explorations d'imagerie (radiographie du thorax, échographie abdominale ou cardiaque, scanner cérébral avec injection, scanner thoracique) à la recherche de signes compatibles avec une tuberculose à chaque fois que la symptomatologie orientera vers une localisation tuberculeuse possible.
- (iii) Une mesure des transaminases, des phosphatases alcalines et de la bilirubine conjuguée au moindre doute clinique d'hépatite médicamenteuse.

En cas de survenue de tuberculose active, le traitement curatif obéira aux règles du programme national de lutte contre la tuberculose en Côte d'Ivoire. Le régime actuellement prescrit en première intention est 2ERHZ/4RH. Pour toute mise en évidence de bacille tuberculeux, on réalisera un antimycobactériogramme, et le traitement sera adapté à ses résultats.

En cas de suspicion de problème d'observance, l'investigateur demandera une consultation d'observance qui sera réalisée par l'assistant(e) sociale(e). Une « *fiche de diagnostic d'observance* » sera remplie par l'Assistante Sociale en fin de consultation puis transmise au médecin qui en a fait la demande

## 8.6. FICHES EVENEMENTIELLES

En plus des fiches prévues en pré-inclusion, à l'inclusion et à chaque visite systématique, feront l'objet d'une déclaration par fiche les événements suivants pouvant survenir n'importe quand au cours du suivi :

- Fiche chimioprophylaxie par INH (bras 2 et 4 uniquement) : médecin investigateur
- Fiche traitement ARV : médecin investigateur
- Fiche déclaration de grossesse : médecin investigateur
- Fiche suivi de grossesse : comité de validation des événements
- Annexe fiche de suivi systématique mère-enfant : médecin investigateur
- Fiche statut de l'enfant : médecin investigateur
- Fiche d'examen de l'enfant à 6 mois : médecin investigateur
- Fiche déclaration de tuberculose : comité de validation des événements
- Fiche validation de tuberculose: comité de validation des événements
- Fiche fin de traitement anti-tuberculeux: comité de validation des événements
- Fiche déclaration des événement morbide : comité de validation des événements
- Fiche d'Hospitalisation de jour : médecin investigateur
- Fiche d'Hospitalisation classique: médecin investigateur
- Fiche de déclaration initiale d'un effet indésirable grave : moniteur
- Fiche de déclaration complémentaire d'un effet indésirable grave: moniteur
- Fiche de retrait de consentement : médecin investigateur
- Fiche de non respect injustifié de stratégie : moniteur
- Fiche de diagnostic d'observance : assistant(e) social(e)
- Fiche de dernier contact : assistant(e) social(e)
- Fiche de décès (tous les bras) : moniteur

## 8.7. DECLARATION DES EVENEMENTS MORBIDES

Fera l'objet d'une déclaration systématique, tout nouvel épisode morbide survenant entre l'inclusion et la fin de l'essai répondant aux critères suivants :

- événement classant pour les stades 2, 3, ou 4 de la classification OMS
- événement lié au VIH, même absent de la classification OMS (incluant par exemple le paludisme et les événements bactériens non classant)

- événement jugé *sérieux*, sur la base d'un des critères suivants :
  - o entraînant le décès
  - o entraînant une hospitalisation (en hôpital de jour ou en hôpital de nuit)
  - o entraînant l'interruption d'un médicament
  - o accompagné d'une fièvre supérieure à 37,5°C
  - o suspect d'être un effet secondaire médicamenteux de grade 3 ou 4
  - o ou jugé comme sérieux par l'investigateur pour toutes autres raisons, incluant le retentissement sur la qualité de vie et la nécessité de soins fréquents

Pour un épisode d'un diagnostic donné, on déclarera un *nouvel épisode* comme différent du précédent si ce nouvel événement est séparé de la fin de l'épisode précédent par une période supérieure ou égale à un mois. Pour la tuberculose, la *fin de l'épisode précédent* sera de la guérison de l'épisode telle que définie par les critères de l'OMS <sup>(49)</sup>.

Pour tout événement, l'antériorité par rapport à la date de l'inclusion sera définie comme :

- "exclue" ou "possible" si :
  - o Les symptômes n'avaient pas débuté avant l'inclusion, OU
  - o Les symptômes avaient débuté avant l'inclusion ET le critère principal de définition de la pathologie est apparu après un délai supérieur ou égal à un mois après l'inclusion
- "probable" ou "certaine" si les symptômes avaient débuté avant l'inclusion, ET le critère principal de définition de la pathologie est apparu moins d'un mois après l'inclusion :

Pour les événements faisant l'objet d'un diagnostic étiologique, le diagnostic pourra être validé comme *certain*, *possible* ou (pour la tuberculose uniquement) *probable*. Les critères requis pour valider une tuberculose sont listés au paragraphe 7.1. Les critères requis pour valider les autres diagnostics étiologiques ou classant sont détaillés en annexe 3.

La validation des critères et la décision finale de déclarer un événement seront sous la responsabilité d'un comité de validation des événements dont le fonctionnement est décrit au chapitre 12.3. Chaque événement morbide validé fera l'objet du remplissage d'une « *fiche de validation d'événement morbide non tuberculeux* », d'une « *fiche de validation de tuberculose* » ou d'une « *fiche de fin de traitement anti-tuberculeux* ».

## 8.8. RETRAIT DE CONSENTEMENT, ABANDON, ARRET DE LA STRATEGIE, DEVIATIONS

### 8.8.1. RETRAIT DE CONSENTEMENT ET ABANDON

Une personne sera considérée en *abandon* d'essai si elle ne souhaite plus poursuivre la stratégie et le suivi qui lui ont été assignés par le protocole.

Une personne sera considérée en *retrait de consentement* si non seulement elle ne souhaite plus poursuivre la stratégie et le suivi qui lui ont été assignés par le protocole, mais en plus elle désire retirer les données la concernant de la base de données. Dans ce cas une « *fiche de retrait de consentement* » devra être remplie.

### 8.8.2. ARRET PREMATURE ET DEFINITIF DE LA STRATEGIE DE L'ESSAI

Une personne sera considérée en *arrêt de stratégie* quand elle ne suivra plus – quelle qu'en soit la raison - la stratégie dans laquelle elle aura été randomisée mais qu'elle continuera le suivi prévu dans le cadre du protocole (visites, prélèvements, examens complémentaires).

Les raisons d'arrêt prématuré de la stratégie de l'essai pourront être :

- tout événement médical justifiant l'interruption de la stratégie :
  - o intolérance ou survenue d'un effet indésirable grave ;
  - o apparition ou aggravation d'une pathologie intercurrente ;
  - o progression de la maladie ;
  - o grossesse ;
  - o non-observance du traitement prescrit mettant en péril la santé du patient et nécessitant un changement de protocole thérapeutique ;

- toute autre nécessité d'utiliser une stratégie de traitement non prévue dans le cadre du protocole.
- toute autre raison non médicale, incluant la volonté du participant. Seuls les arrêts prématurés rentrant dans ce cadre seront considérés comme des déviations au protocole et donneront lieu au remplissage d'une « *fiche de non respect injustifié de stratégie* » par le moniteur.

### 8.8.3. PERTE DE VUE

Les personnes ne se rendant pas aux visites systématiques et n'ayant pas été explicitement considérées comme en abandon ou en retrait de consentement feront l'objet d'une recherche par l'équipe sociale (assistants sociaux et le cas échéant et sur proposition de l'assistant social les conseillers associatifs). Cette recherche pourra avoir lieu par téléphone ou par visite à domicile, si la personne en a donné l'accord de principe et a communiqué ses coordonnées lors du contact initial ou lors des visites ultérieures.

Le résultat d'une recherche fera l'objet du remplissage d'une « *fiche de dernier contact* ». Une personne pourra être qualifiée de « à ne pas rechercher » par l'équipe chargée du suivi si la poursuite des recherches est jugée inutile au bout de plusieurs recherches infructueuses ou si la personne a manifesté le désir de ne pas être recherchée.

### 8.8.4. AUTRES DEVIATIONS

Seront considérées comme déviations majeures au protocole les déviations portant sur les aspects réglementaires et sur les critères d'éligibilité, en dehors de celles ayant fait l'objet d'une dérogation écrite du centre de coordination de Bordeaux et des investigateurs principaux.

### 8.8.5. CONSEQUENCES

Une personne qui *abandonnera* l'essai ou qui *retirera son consentement* de participation à l'essai, comme elle est en droit de le faire à tout moment, ne sera plus astreinte aux procédures du protocole, mais fera l'objet de la même proposition de prise en charge gratuite que les autres, par la même équipe et pendant la même durée. Lorsqu'une personne souhaitera explicitement *retirer son consentement* de participation à l'essai, les données la concernant seront retirées de la base de données et les échantillons biologiques seront détruits. L'investigateur devra identifier la cause de l'abandon ou du retrait, et évaluer s'il est possible de recueillir la variable sur laquelle porte le critère de jugement principal au moment de l'abandon ou du retrait.

Pour les personnes en arrêt de stratégie, aucun changement ne surviendra pendant la durée de suivi dans l'essai, en termes de visites, de bilans, ou de prise en charge du transport et des soins.

Les abandons et retraits d'essai, les arrêts injustifiés de stratégie, et les autres déviations majeures devront être notifiés par l'investigateur à l'équipe coordinatrice à Abidjan lors des visites de site hebdomadaires. Le nombre de personnes concernées par chacune de ces déviations, ainsi que le nombre de personnes perdues de vue, devront être présentés à chaque réunion du Conseil Scientifique et du Comité Indépendant de Surveillance.

## 9. EVÉNEMENTS INDÉSIRABLES GRAVES

### 9.1. DÉFINITION

Un **événement indésirable** est tout symptôme, signe, maladie ou réaction qui se développe ou s'aggrave pendant la durée de participation d'un patient à une recherche biomédicale. Tout événement intercurrent peut être considéré comme un événement indésirable, sans être nécessairement lié aux stratégies de l'essai ou aux conditions de la recherche.

Un **événement indésirable grave** est un **événement indésirable** qui répond à l'un au moins des critères suivants :

- est **fatal** ou met en jeu le **pronostic vital** ;
- entraîne un **handicap** ou une **incapacité** ayant un caractère important ou durable ;
- est une **anomalie congénitale** touchant la descendance des patients ayant reçu les traitements de l'essai ;

- entraîne une **hospitalisation**, ou une **prolongation d'hospitalisation** ;
- est **jugé potentiellement grave** par l'investigateur.

Par convention avec l'ANRS :

- seront notamment systématiquement « jugés graves » (liste non exhaustive) tous les **événements cliniques ou biologiques de grade 4** selon la classification des effets indésirables de l'ANRS (annexe 2), toutes les pathologies tumorales malignes et toutes les « overdose » ;
- seront exclus de la liste des événements indésirables graves à déclarer les événements dont la seule raison pour être jugé comme tel aurait été le critère « hospitalisation » ET qui répondront à un des critères suivants :
  - o traumatisme **accidentel**, à l'exclusion des fractures pathologiques ou sur ostéonécrose
  - o acte chirurgical **programmé**
  - o pathologie d'origine infectieuse qu'elle soit ou non liée au VIH\*, remplissant les deux critères suivants :
    - de diagnostic « certain ou probable »
    - d'origine non iatrogénique, ou d'origine iatrogénique mais sans rapport avec un geste prescrit dans le cadre du protocole et/ou par un médecin de l'équipe investigatrice.
  - o pathologie d'origine non infectieuse et non tumorale remplissant un des deux critères suivants :
    - soit liée au VIH\*,
    - soit non liée au VIH\* mais pré-existante à l'inclusion et ne s'aggravant pas au cours du suivi.

\* Sera considérée comme « liées au VIH » toute pathologie classant au stade clinique 2, 3, ou 4 de la classification en stades cliniques de l'OMS, et comme « non liée au VIH » toute pathologie ne figurant pas dans cette classification OMS<sup>35</sup> (annexe 1).

Un **effet indésirable inattendu** désigne un événement indésirable dont la nature ou la gravité ne concorde pas avec les informations relatives aux stratégies appliquées.

## 9.2. NOTIFICATION

Tout événement indésirable grave doit être déclaré, s'il survient :

- à partir de la **date de signature du consentement**,
- pendant toute la **durée de suivi** prévue par l'essai,
- jusqu'à **30 jours après la fin** du suivi prévue par l'essai, lorsqu'il est susceptible d'être dû à la recherche ou lorsqu'il entraîne le décès,
- **sans limitation de durée** lorsqu'il est susceptible d'être dû à la stratégie expérimentale (par exemple les effets graves pouvant apparaître à grande distance, tels les cancers ou les anomalies congénitales).

L'investigateur doit notifier toute présomption d'événement indésirable grave (quelle que soit l'imputabilité) en temps réel au moniteur du centre de coordination de l'essai à Abidjan dès qu'il en a connaissance. Cette notification se fait par contact direct ou par téléphone.

Le moniteur documente et valide alors la réalité de l'événement indésirable grave, remplit le formulaire de « *déclaration initiale d'un événement indésirable grave* » et le transmet par mail avec accusé de réception conjointement au centre de coordination de l'essai à Bordeaux et à l'ANRS. Le processus entre la connaissance de la présomption d'événement indésirable grave par l'équipe du centre de coordination et la déclaration au promoteur ne doit pas dépasser le délai exigé par le promoteur.

Après sa notification initiale, l'événement indésirable grave doit faire l'objet d'un suivi jusqu'à sa résolution. Les EIG dont l'évolution est encore en cours le jour de la déclaration initiale devront faire l'objet d'une « *fiche de déclaration complémentaire d'un événement indésirable grave* ».

Les détails concernant les fiches de déclaration d'EIG, les définitions utilisées dans ces fiches (et notamment de l'imputabilité), les délais de notification et les conditions de notifications complémentaires

seront fixés par une procédure rédigée en collaboration avec le promoteur avant le début des inclusions. Les modalités de la transmission de la déclaration des événements indésirables graves aux firmes fournissant les médicaments de l'essai seront détaillées dans le contrat liant l'ANRS et ces firmes.

### 9.3. CONSEQUENCES POUR LES MEDICAMENTS DE L'ESSAI

La survenue d'un effet indésirable hépatique de grade 3 ou 4 sous isoniazide amènera à interrompre la prophylaxie antituberculeuse définitivement. L'arrêt de l'INH sera déclaré par le médecin investigateur sur la « *fiche chimioprophylaxie par INH* ». Il n'est pas prévu de ré-introduction de l'isoniazide, même si d'autres médicaments également possiblement responsables de l'effet indésirable ont aussi été interrompus.

La survenue d'un effet indésirable de grade 3 ou 4 imputable à un des médicaments antirétroviraux amènera à l'arrêt de la ou les molécules potentiellement responsables et à la modification du régime de traitement antirétroviral sans changer de stratégie.

## 10. GROSSESSES ET NOUVEAUX NES

### 10.1. TRAITEMENTS PENDANT LA GROSSESSE ET L'ALAITEMENT

La survenue d'une grossesse entraînera l'arrêt définitif de l'isoniazide ainsi que de tout médicament non antirétroviral en cours d'administration qui serait contre indiqué en cas de grossesse. Le traitement par isoniazide ne sera pas réintroduit après l'accouchement.

Si un traitement antirétroviral est en cours au moment de la découverte de la grossesse, il sera poursuivi, avec le cas échéant une adaptation du régime si la personne reçoit une ou plusieurs molécules considérées comme possiblement embryo/foeto toxique ou toxiques pour le nouveau né ou d'innocuité moins bien établie que d'autres molécules utilisables en alternative. Sous réserve d'information complémentaire aboutissant à une décision du conseil scientifique, les personnes recevant l'association ténofovir-emtricitabine-efavirenz ou ténofovir-emtricitabine-zidovudine au moment de la survenue d'une grossesse changeront de régime pour une association zidovudine-lamivudine-lopinavir/ritonavir.

Si aucun traitement n'est en cours, un traitement antirétroviral efficace sera débuté au début du deuxième trimestre de grossesse s'il y a des facteurs de risque d'accouchement prématuré, ou sinon à la fin du second trimestre de grossesse, et ceci quel que soit le dernier chiffre de CD4 connu de la personne, avec un régime ne contenant pas de molécule embryo/foeto toxique ou toxique pour le nouveau né. Sous réserve d'un autre choix validé par le conseil scientifique, l'association zidovudine-lamivudine-lopinavir/ritonavir sera choisie en première intention.

### 10.2. DECLARATION

Toute grossesse, qu'elle qu'en soit l'issue, fera l'objet du remplissage d'une « *fiche de déclaration grossesse* » par le comité de validation des événements. Ceci inclut les interruptions prématurées de grossesse (spontanées, volontaires ou pour raisons médicales) quel qu'en soit le terme, et les grossesses avec naissance par accouchement ou par césarienne, que l'enfant soit vivant ou décédé à la naissance. Une « *fiche suivi de grossesse* » sera remplie au terme de la grossesse.

Les « *fiche de déclaration grossesse* » et les « *fiche suivi de grossesse* » seront transmises par mail avec accusé de réception conjointement au centre de coordination de l'essai à Bordeaux et à l'ANRS. Le processus entre la connaissance de la grossesse ou son issue par l'équipe du centre de coordination et la déclaration au promoteur ne doit pas dépasser le délai exigé par le promoteur.

Des modalités particulières de déclaration des grossesses aux firmes fournissant les médicaments de l'essai pourront être convenues entre l'ANRS et ces firmes. Elles seront alors détaillées dans le contrat liant l'ANRS et ces firmes.

### 10.3. ENFANTS NES DE MERES PARTICIPANT A L'ESSAI

Les nouveaux nés de mère participant à l'essai feront l'objet de la surveillance suivante :

- à huit semaines de vie : une première recherche d'ARN VIH-1 plasmatique par PCR, répétée en cas de positivité ou après la fin de l'allaitement en cas de négativité mais d'allaitement maternel encore en cours ;

- au sixième mois de vie : une consultation avec un pédiatre, pour déterminer si l'examen clinique et le développement sont normaux et s'il y a lieu de prévoir des explorations supplémentaires ;
- au douzième mois de vie : une sérologie VIH-1 et VIH-2, répétée en cas de positivité ou répétée après la fin de l'allaitement en cas de négativité mais d'allaitement maternel encore en cours.

Les résultats des PCR et de la sérologie seront consignés par l'équipe de monitoring sur la « *fiche statut de l'enfant* » présente dans le dossier de la mère. Les résultats de la consultation du sixième mois feront l'objet d'un remplissage par le pédiatre de la « *fiche d'examen de l'enfant à 6 mois* ».

De plus, à chaque contact avec la mère entre 0 et 18 mois suivant l'accouchement, des questions seront posées à la mère sur le type d'allaitement en cours (avec délivrance de conseils adéquats), sur l'état de santé de l'enfant, et sur le poids et la taille de l'enfant (tels que recueillis sur le carnet de santé). Ces données seront consignées sur une « *fiche de suivi systématique mère-enfant* » jointe à la « *fiche de suivi systématique* » de la mère du mois correspondant.

Les nouveaux-nés exposés sans diagnostic définitif et les nouveaux-nés avec un diagnostic définitif d'infection par le VIH seront référés dans les services de pédiatrie du CePREF, du CHU de Yopougon, du CHU de Treichville et du CIRBA pour suivi et prise en charge adaptées.

## **11. ANALYSES STATISTIQUES**

### **11.1. MÉTHODES STATISTIQUES**

#### **11.1.1. STRATEGIES D'ANALYSE**

L'analyse principale sera effectuée en intention de traiter.

Secondairement :

- une analyse sous traitement sur données disponibles (« *analyse per protocole* ») sera effectuée.
- une analyse de sensibilité aux données manquantes sera réalisée d'abord en intention de traiter en utilisant la stratégie « *missing = failure* » (toute valeur manquante sera remplacée par la valeur correspondant à l'échec) selon les recommandations de l'ICH, puis en utilisant la stratégie du biais maximum.

La description se fera toujours globalement et par groupe de stratégie.

Les comparaisons entre groupes de stratégie se feront systématiquement en ajustant sur la variable initiale de stratification (le centre de suivi) et les autres caractéristiques initiales dont la répartition pourrait être, malgré la randomisation, déséquilibrée entre groupes de stratégie. Ces ajustements nécessiteront éventuellement d'utiliser des modèles appropriés dont la pertinence du choix sera discutée en fonction de la distribution et du type de variables.

Cet essai est un essai de supériorité. Aussi, pour le critère de jugement principal et pour la recherche d'une interaction, les tests de comparaison des groupes seront bilatéraux avec un risque global de première espèce  $\alpha$  de 5%.

D'après le schéma de l'étude, on utilisera un modèle approprié qui permettra de réaliser les comparaisons suivantes :

- Comparaison du « *traitement antirétroviral précoce* » (bras 3 et 4) vs « *traitement antirétroviral selon les critères OMS et nationaux* » (bras 1 et 2), sans tenir compte de la chimioprophylaxie par INH.
- Comparaison de « *chimioprophylaxie par INH* » (bras 2 et 4) vs « *pas de chimioprophylaxie par INH* » (bras 1 et 3), quelque soit le stade de début du traitement antirétroviral.
- Effet du « *traitement antirétroviral précoce* » vs « *traitement antirétroviral selon les critères OMS et nationaux* » selon la présence ou pas de chimioprophylaxie par INH : recherche d'une interaction traitement antirétroviral précoce \* chimioprophylaxie par INH.

Si le test de l'interaction est non significatif, alors on testera l'effet du « *traitement antirétroviral précoce* » vs « *traitement antirétroviral selon les critères OMS et nationaux* », puis l'effet de « *chimioprophylaxie par INH* » vs « *pas de chimioprophylaxie par INH* ». On décrira les données puis interprétera les résultats.

Si le test de l'interaction est significatif, ces analyses globales ne seront pas possibles. Une possibilité d'analyses stratifiées sera discutée.



### 11.1.2. METHODES STATISTIQUES

Les variables qualitatives initiales seront décrites en termes d'effectif, de pourcentage et le cas échéant d'intervalle de confiance. Les comparaisons des groupes de stratégie se feront par des régressions logistiques ou polynomiales.

Les variables quantitatives initiales seront décrites en termes d'effectif, moyenne, écart-type, médiane, étendue et étendue interquartile. Les comparaisons des groupes de stratégie se feront par de l'analyse de variance si la distribution de la variable d'intérêt suit une loi normale. Des transformations pour normaliser la variable seront effectuées si nécessaire.

Les incidences de survenue du premier événement d'intérêt seront décrites en termes d'incidence pour 100 patient-années. La survenue des événements d'intérêt sera ensuite décrite en termes de probabilité de survenue (avec intervalle de confiance à 95%) par la méthode de Kaplan-Meier. La date d'origine sera la date de randomisation dans l'essai et le délai de survenue sera l'intervalle entre la date de diagnostic du premier événement et la date d'inclusion. Les différents groupes de stratégie seront comparés par le test du log-rank ou des modèles à risques proportionnels.

### 11.1.3. LOGICIELS

La sélection des observations d'intérêt, la préparation des fichiers et les analyses statistiques seront effectuées sous le logiciel SAS® version 9.1 et versions ultérieures (SAS Institute Inc., Cary, NC).

## 11.2. CALCUL DU NOMBRE DE PARTICIPANTS NECESSAIRES

Dans l'essai Trivacan ANRS 1269, on estimait à 5% la probabilité de survenue de la tuberculose ou décès à un an de suivi chez les personnes ayant entre 250 et 350 CD4/mm<sup>3</sup>. Sur des personnes ayant entre 350 et 500 CD4/mm<sup>3</sup> à l'inclusion, on fait les hypothèses suivantes :

|                 | Probabilité de tuberculose |              |
|-----------------|----------------------------|--------------|
|                 | ARV OMS                    | ARV précoce  |
| Inclusion à M12 | 4,5%                       | 2,5%         |
| M12 à M24       | 3,5%                       | 1,5%         |
| M24 à M30       | 1,25%                      | 0,75%        |
| <b>Total</b>    | <b>9,25%</b>               | <b>4,75%</b> |

Sur la base des essais de prophylaxie antituberculeuse réalisés avant l'ère du VIH, on espère une diminution de 45% de tuberculose dans les groupes avec INH par rapport aux groupes sans INH.

Les probabilités de tuberculose ou décès attendues à 30 mois dans les quatre groupes sont donc :

|            |          | INH   |       |          |
|------------|----------|-------|-------|----------|
|            |          | Oui   | Non   | Ensemble |
| <b>ARV</b> | Précoce  | 2,57% | 4,75% | 3,66%    |
|            | OMS      | 5,00% | 9,25% | 7,13%    |
|            | Ensemble | 3,79% | 7,00% | 5,40%    |

D'après la formule du calcul de taille d'échantillons selon le test de log-rank de comparaison de survie entre 2 groupes (logiciel Nquery), avec un risque  $\alpha$  de 5% et une puissance de  $1-\beta$  de 80%, il faudrait inclure :

- au moins  $771 \times 2 = 1542$  patients, pour la comparaison INH vs pas d'INH
- au moins  $668 \times 2 = 1336$  patients pour la comparaison traitement ARV précoce vs traitement ARV selon les recommandations nationales.

L'effectif retenu est donc de 1542 patients. Compte tenu de ce que le plan factoriel nécessite un test d'interaction, nous introduisons un facteur de correction de 1,20 conduisant à un nombre de personnes à inclure de  $1542 \times 1,2 = 1850$ .

La proportion de personnes perdues de vue étant estimée à 1,7% à 30 mois de suivi (données de l'essai Trivacan ANRS 1269), on applique un facteur de correction supplémentaire de :  $R=1/(2p-1)^2$  (avec  $p=1$ -[taux de perdus de vue] soit  $R=1,072$ ).

L'effectif nécessaire est donc estimé à  $1850 \times 1,072 = 1984$  personnes.

### 11.3. PLAN D'ANALYSE

#### 11.3.1. DESCRIPTION DES INCLUSIONS ET DU SUIVI

Les patients pré-inclus et non inclus dans l'essai seront décrits et comparés aux patients inclus.

Le nombre de patients inclus, la courbe des inclusions (évolution du nombre des patients inclus entre la première et la dernière inclusion), le nombre de visites théoriques correspondant au nombre de patients inclus, le nombre de visites réellement effectuées et le rapport des deux (nombre de visites effectuées/nombre de visites théoriques) seront présentés par groupe. La durée cumulée de suivi réel sera calculée comme la somme du temps de participation pour chacun des patients inclus, c'est-à-dire de la différence entre la date d'inclusion et la date du dernier contact dans l'essai ; le rapport de la durée cumulée de suivi réel/durée de suivi cumulée attendue sera présenté.

#### 11.3.2. PATIENTS INCLUS DANS L'ANALYSE

Les patients seront a priori tous inclus dans l'analyse y compris les patients décédés, perdus de vue ou ayant abandonné l'essai.

La décision d'exclusion d'un patient de l'analyse sera prise par le Conseil Scientifique après documentation de l'observation par le centre de coordination à Bordeaux, en insu du groupe de stratégie et de l'évolution du patient après l'inclusion. Dans ces conditions, les patients qui présenteront au moins une des conditions suivantes pourront être exclus de l'analyse :

- patients n'ayant jamais suivi la stratégie de l'essai (à condition de ne pas avoir eu connaissance du groupe dans lequel ils ont été randomisés) ;
- patients ayant retiré leur consentement ;
- patients inclus à tort pour critère(s) majeur(s) d'éligibilité non respecté(s).

#### 11.3.3. CARACTERISTIQUES DES PATIENTS A M0

Les patients seront décrits selon les variables suivantes :

- respect des critères d'éligibilité ;
- caractéristiques épidémiologiques ;
- caractéristiques cliniques ;
- caractéristiques biologiques ;
- caractéristiques de traitements ;

Une description des violations du protocole et des patients répartis selon ces violations sera faite.

Une description des causes de décès, d'abandon, de retrait et d'arrêt de stratégie sera faite et les patients décédés, perdus de vue, ayant abandonné l'essai, s'étant retiré de l'essai ou ayant arrêté la stratégie seront décrits et comparés aux autres patients.

#### 11.3.4. CRITERE DE JUGEMENT PRINCIPAL

On décrira l'incidence de la tuberculose, du décès, et du premier parmi les deux événements. La probabilité de survenue de la tuberculose ou du décès sera estimée par la méthode de Kaplan-Meier. Pour la comparaison entre deux stratégies, on utilisera un modèle à risques proportionnels sur le risque de survenue du premier événement d'intérêt. Les variables explicatives seront l'effet de l'intervention « INH », l'effet de l'intervention « ARV précoce » et l'interaction entre les deux facteurs. On vérifiera les hypothèses du modèle à risques proportionnels. Si ce modèle n'est pas applicable, on comparera les distributions des deux stratégies (bras 2 et 4 vs 1 et 3, puis bras 3 et 4 vs 1 et 2) par un test du Log-Rank.

### 11.3.5. CRITERES DE JUGEMENT SECONDAIRES

On décrira l'incidence des événements indésirables et l'incidence des événements morbides selon leur nature, leur gravité, et leur délai de survenue après l'inclusion. La probabilité de survenue d'un premier effet indésirable clinique ou biologique de grade 3 ou 4, et la probabilité de survenue d'un premier événement morbide classant pour les stades OMS 3 ou 4, seront estimées par la méthode de Kaplan-Meier, et comparées entre les stratégies selon le même principe que pour le critère de jugement principal.

Dans l'analyse des variables immunologiques continues, on utilisera un modèle linéaire à effets fixes. Les variables explicatives seront l'effet de l'isoniazide et du traitement « ARV précoce », avec interaction entre les 2 facteurs. On vérifiera les hypothèses du modèle linéaire. Si ce modèle n'est pas applicable, on comparera les distributions des deux stratégies par un test de Kruskal-Wallis.

Dans l'analyse des réponses virologiques binaires, on utilisera un modèle de régression logistique à effets fixes, avec les mêmes variables explicatives que ci-dessus. On vérifiera les hypothèses du modèle logistique. Si ce modèle n'est pas applicable, on comparera les distributions des deux stratégies par un test du  $\chi^2$  si approprié, ou un test exact de Fisher.

## 11.4. ANALYSE INTERMÉDIAIRE

L'analyse intermédiaire pourra porter sur deux critères de sécurité : toxicité et efficacité.

Critère de toxicité : mortalité toutes causes confondues. A partir des hypothèses ayant servi au calcul du nombre de participants nécessaire, on estime respectivement à 30, 33 et 36 le nombre de décès attendus avant 12, 18 ou 24 mois après inclusion du dernier participant.

Pour des questions de puissance, une analyse intermédiaire ne paraît pertinente que si le nombre de décès observés était d'au moins 50. En conséquence, aucune analyse intermédiaire n'est programmée pour ce critère. Elle pourra malgré tout être effectuée par le comité indépendant de surveillance, si le nombre de décès observés dépasse les prévisions. Dans ce cas, pour tenir compte de la multiplicité des tests, on ajustera le risque alpha selon la procédure proposée par Pocock<sup>45,46</sup>.

Critère d'efficacité : tuberculose ou décès. A partir des hypothèses ayant servi au calcul du nombre de participants nécessaire, on estime respectivement à 104, 113 et 123 le nombre d'épisodes de tuberculoses attendus avant 12, 18 ou 24 mois après inclusion du dernier patient.

Une analyse intermédiaire de ce critère est donc programmée lorsque le dernier participant inclus atteindra 24 mois de suivi, afin d'assurer la meilleure puissance. Pour tenir compte de la multiplicité des tests, on ajustera le risque alpha selon la procédure proposée par O'Brien et Fleming<sup>47,48</sup>. Une analyse intermédiaire plus précoce pourra être décidée par le comité indépendant de surveillance, si le nombre d'événements observés dépasse les prévisions.

## 12. SURVEILLANCE DE L'ESSAI

### 12.1. CONSEIL SCIENTIFIQUE

#### 12.1.1. COMPOSITION

Il sera composé : (i) des investigateurs principaux, coordonnateur, méthodologiste, biologiste et statisticien de l'essai, (ii) d'experts extérieurs à l'équipe investigatrice ayant une compétence dans les domaines du VIH et de la tuberculose, et (iii) d'un représentant associatif. L'ANRS et les firmes fournissant des médicaments pour le traitement des participants à l'essai seront systématiquement invités à participer aux réunions du conseil scientifique à titre d'observateur.

*Liste des experts extérieurs du conseil scientifique Temprano*

|                        |               |                                   |
|------------------------|---------------|-----------------------------------|
| Pr Emmanuel Bissagnene | Infectiologue | CHU Treichville, Abidjan          |
| Pr Mireille Dosso      | Biologiste    | Institut Pasteur de Côte d'Ivoire |
| Pr Kouao Domoua        | Pneumologue   | CHU Treichville, Abidjan          |
| Pr Papa Salif Sow      | Infectiologue | CHNU de Fann, Dakar               |
| Pr Christian Perronne  | Infectiologue | CHU Raymond Poincaré, Garches     |
| Pr Christine Rouzioux  | Virologue     | CHU Necker, Paris                 |
| Pr Pierre Marie Girard | Infectiologue | CHU Saint Antoine, Paris          |

|                                 |                         |                                 |
|---------------------------------|-------------------------|---------------------------------|
| Pr Vincent Jarlier              | Biologiste              | CHU Pitié-Salpêtrière, Paris    |
| Pr Genevieve Chene              | Méthodologiste          | Université Bordeaux 2, Bordeaux |
| Dr Virginie Traore              | Santé Publique          | PNPEC, MSHP, Abidjan            |
| Dr Adjoufourou Ange Chantal     | Représentant associatif | Association Ruban Rouge         |
| <b>Observateurs permanents</b>  |                         |                                 |
| Représentant du promoteur       |                         | ANRS, Paris                     |
| Représentant de Gilead Sciences |                         | Gilead Sciences, Paris          |
| Représentant de Merck & Co      |                         | Merck & Co,                     |

### 12.1.2. RYTHME DES REUNIONS

Le Conseil Scientifique se réunira avant l'ouverture des sites cliniques puis une à deux fois par an jusqu'à la clôture de l'essai.

Une réunion extraordinaire pourra, à tout moment, être convoquée à la demande du promoteur ou d'un ou de plusieurs membres.

### 12.1.3. ROLE

Le Conseil Scientifique aura pour mission de veiller au bon déroulement de la recherche, tant sur le plan scientifique que sur celui des bonnes pratiques cliniques et de l'éthique, et d'en répondre vis-à-vis du promoteur.

- Il s'assurera de la bonne marche de l'essai, du respect du protocole et de la sécurité des patients ;
- Il assurera le suivi scientifique de l'essai : maintien de la pertinence des questions de recherche de l'essai et de la validité des méthodes mises en œuvre pour y répondre ;
- Il décidera de toute modification pertinente du protocole nécessaire à la poursuite de l'essai, portant *par exemple* sur :
  - Les mesures permettant de faciliter le recrutement dans l'essai,
  - Les décisions d'ouvrir ou de fermer des sites participant à l'essai.
- Il veillera à l'application des règles d'accès aux données de l'essai et de communication et publication de ses résultats ;
- Il maintiendra un lien permanent avec le promoteur, le Comité Indépendant de Surveillance et les investigateurs, et s'assurera de l'information de l'ensemble des investigateurs et autres participants de la recherche.

Les modifications du protocole approuvées par le Conseil Scientifique seront soumises sous forme d'amendement pour approbation écrite au directeur de l'ANRS par les investigateurs principaux.

Après chaque réunion un compte-rendu de séance sera rédigé, et diffusé aux membres du conseil et au directeur de l'ANRS.

## 12.2. COMITÉ INDÉPENDANT DE SURVEILLANCE

### 12.2.1. COMPOSITION

Il sera composé des cinq personnalités suivantes, désignées par le directeur de l'ANRS sur proposition des investigateurs principaux.

#### *Liste des membres du Comité Indépendant de Surveillance de l'essai Temprano*

|                          |                 |                                      |
|--------------------------|-----------------|--------------------------------------|
| Pr Dominique Costagliola | Epidémiologiste | U720 INSERM, Paris, France           |
| Pr Souleymane Mboup      | Virologue       | CHU Le Dantec, Dakar, Sénégal        |
| Pr Yazdanpanah Yazdan    | Infectiologue   | CHU de Tourcoing, France             |
| Pr Brigitte Autran       | Immunologue     | CHU Pitié-Salpêtrière, Paris, France |
| Pr Ogobara Doumbo        | Epidémiologiste | Université de Bamako, Mali           |

### 12.2.2. RYTHME DES REUNIONS

Le Comité Indépendant de Surveillance se réunira une première fois au début des inclusions, puis tous les 12 mois jusqu'à la clôture de l'essai.

Ce rythme de réunion pourra être plus rapproché sur demande du Comité Indépendant de Surveillance lui-même, du Conseil Scientifique de l'essai ou du promoteur.

### **12.2.3. ROLE**

Ce comité aura un rôle consultatif pour le conseil scientifique.

Il donnera un avis général sur la marche de l'essai, notamment sur le respect du calendrier des inclusions, la qualité du suivi, le rythme global de survenue des effets secondaires, l'évolution des marqueurs biologiques et le rythme global de survenue du critère de jugement principal.

Il pourra aider à prendre en cours d'essai les décisions difficiles pour lesquelles un jugement indépendant est souhaitable, notamment dans les circonstances suivantes :

- avis sur un arrêt prématuré de l'essai (pour toxicité ou parce que l'essai n'est plus réalisable, ou parce que les éléments permettant de conclure sont déjà rassemblés) ;
- avis sur des modifications profondes du protocole devenues nécessaires à cause du recrutement ou du suivi de l'essai, ou pour tenir compte de données scientifiques nouvelles ;

Il sera chargé de la réalisation et de l'interprétation des analyses intermédiaires, selon les principes définis au chapitre 9.4.

Après chaque séance, l'avis du Comité Indépendant de Surveillance sera transmis par écrit au promoteur et aux membres du Conseil Scientifique.

## **12.3. COMITÉ DE VALIDATION DES ÉVÈNEMENTS**

### **12.3.1. COMPOSITION**

Il sera composé dans chacun des centres de suivi de : (i) l'investigateur du centre, (ii) un ou plusieurs autres médecins du centre désignés par lui au début de l'essai et ayant reçu la formation adéquate ; (iii) un représentant de l'équipe de monitoring désigné par les investigateurs principaux.

### **12.3.2. RYTHME DES REUNIONS**

Il se réunira à raison d'une session tous les trois mois dans chaque centre de suivi. Chaque session dure le temps qu'il faut pour passer en revue tous les événements survenus dans les trois mois précédents.

### **12.3.3. ROLE**

Il reverra systématiquement l'ensemble des dossiers cliniques des participants suivis dans le centre. Il sera chargé de valider les critères faisant qu'un événement morbide doit être déclaré. Les événements devant être exhaustivement déclarés, et les critères les définissant, sont détaillés au paragraphe 8.7 et en annexe 3.

Chaque événement validé fera l'objet du remplissage d'une des fiches suivantes :

- « Fiche de suivi de grossesse »
- « Fiche de validation de tuberculose »
- « Fiche de fin de traitement anti-tuberculeux »
- « Fiche de validation d'un événement morbide »

## **13. ASPECTS ETHIQUES ET RÉGLEMENTAIRES**

### **13.1. CONFORMITÉ AUX TEXTES DE RÉFÉRENCE**

Le promoteur et les investigateurs s'engagent à ce que cette étude soit réalisée en conformité avec la déclaration d'Helsinki (Principes éthiques applicables aux recherches médicales sur des sujets humains).

Le protocole, les amendements, la note d'information et le formulaire de consentement de cet essai seront soumis pour approbation au comité national d'éthique de Côte d'Ivoire, au Programme National de Prise en Charge (PNPEC) des personnes vivant avec le VIH du Ministère de la Santé et de l'Hygiène Publique de Côte d'Ivoire et au Programme National de Lutte contre la Tuberculose de Côte d'Ivoire.

Le protocole, les amendements, la note d'information et le formulaire de consentement de cet essai seront déposés à la Direction de la Pharmacie et du Médicament du Ministère de la Santé et de l'Hygiène Publique de Côte d'Ivoire.

### 13.2. AMENDEMENT AU PROTOCOLE

Toute modification de nature à avoir un impact significatif sur la protection des personnes, sur les conditions de validité et sur les résultats de la recherche, sur l'interprétation des documents scientifiques qui viennent appuyer le déroulement de la recherche ou sur les modalités de conduite de celle-ci, fait l'objet d'un amendement écrit qui est validé par le Conseil Scientifique puis soumis par écrit par les investigateurs principaux au promoteur pour approbation. Après avis favorable, l'amendement est signé par les investigateurs principaux et par le promoteur de la même manière que la version initiale de ce protocole.

Les modifications mineures, ne modifiant pas le sens du protocole, sont communiquées au promoteur à titre d'information.

### 13.3. CONFIDENTIALITÉ DES DONNÉES

Chaque participant se verra attribuer un code anonyme d'identification, composé du code lettre du centre investigateur sur 2 lettres et d'un numéro de patient sur 4 chiffres. Ce code sera le seul identifiant à figurer sur tous les documents relatifs à l'essai (cahier d'observation de l'essai et fiches de demande d'examen biologiques) et à faire l'objet d'une saisie informatique. Aucune correspondance entre nom et numéro de participation ne sera informatisée, ni au niveau de la base de donnée centrale de l'essai, ni au niveau des différentes bases de données des centres participants, que ces bases soient constituées ou non pour l'essai.

### 13.4. ASSURANCE ET PRISE EN CHARGE DES PARTICIPANTS

Le promoteur de cette étude, souscrira un contrat d'assurance en responsabilité civile.

Une copie de l'attestation d'assurance sera disponible sur demande à l'ANRS.

Pour chaque participant, le budget de l'essai assurera pendant les 30 mois de suivi : le remboursement d'un forfait de transport pour chaque contact avec le centre (systématiques ou imprévus), la gratuité intégrale pour tous les actes ou examens complémentaires (liés ou non à l'essai) décidés ou approuvés par l'équipe médicale de l'essai, et la gratuité intégrale pour tous les médicaments antirétroviraux et non antirétroviraux nécessaires (liés ou non à l'essai) prescrits ou approuvés par l'équipe médicale de l'essai. L'approbation de l'achat des médicaments et de la prise en charge des explorations complémentaires se fera automatiquement et sans accord préalable sur la base d'une liste établie avant le démarrage de l'essai et s'inspirant du précédent de l'essai Trivacan ANRS 1269. Pour toute dépense ne se trouvant pas sur cette liste, la justification de la prise en charge sera discutée au cas par cas entre le médecin investigateur du centre concerné et le coordinateur de l'essai ou le moniteur le représentant, joignables pour cela à tout moment. Pour les actes médicaux ou hospitalisation en dehors des centres de suivi de l'essai, la prise en charge intégrale sera également la règle lorsque ces actes ou hospitalisations auront été décidées ou jugés rétrospectivement justifiés au cas par cas entre le médecin investigateur du centre concerné et le coordinateur de l'essai ou le moniteur le représentant, joignables pour cela à tout moment.

A la fin des 30 mois de suivi, les participants seront pris en charge dans les conditions définies par le Ministère de la Santé et de l'Hygiène Publique de Côte d'Ivoire : accès au traitement antirétroviral subventionné et aux examens biologiques systématiques semestriels, moyennant un forfait mensuel familial de 1000 FCFA/mois. Le Ministère de la Santé et de l'Hygiène Publique de Côte d'Ivoire s'est engagé avant le début de l'essai à ce que les participants aient accès dans ce cadre au régime de traitement ARV qui sera en cours au moment de la fin de l'essai. Le suivi médical post-essai pourra se poursuivre dans le centre de soins où les personnes auront été suivies pendant l'essai et avec la même équipe médicale, ou dans tout autre centre de soins du pays, selon le désir de la personne. Dans ce dernier cas, un transfert de dossier sera organisé par l'équipe de l'essai, pour permettre la continuité des soins.

Six mois avant la sortie de l'essai, les conditions exactes de sortie et d'organisation de la prise en charge feront l'objet d'une notice écrite et d'une explication orale individuelle à tous les participants.

### 13.5. ARCHIVAGE ET STOCKAGE DES DOCUMENTS A LA FIN DE L'ETUDE

**Les documents suivants relatifs à cette étude** seront archivés :

- Par les investigateurs principaux:

- **pour une durée de 15 ans suivant la fin de l'étude**
  - Les dossiers source des participants ayant signé un consentement
  - Tous les autres documents et courriers relatifs à l'étude
- Par les centres de coordination d'Abidjan et de Bordeaux (pour le compte du promoteur) :
  - **pour une durée de 15 ans suivant la fin de l'étude**
    - Le protocole et les amendements éventuels au protocole
    - Les classeurs d'observation
    - Tous les autres documents et courriers relatifs à l'étude
    - L'exemplaire original des consentements éclairés signés des participants

Tous ces documents seront sous la responsabilité du directeur de l'INSERM Unité 593 pendant la durée réglementaire d'archivage.

### 13.6. ENREGISTREMENT DE L'ESSAI

Cet essai est enregistré sur le site <http://www.clinicaltrials.gov/> avec le numéro NCT00495651.

## 14. MONITORAGE ET BONNES PRATIQUES CLINIQUES

### 14.1. ORGANISATION GÉNÉRALE

Le monitoring sera assuré conjointement par l'équipe du centre de coordination de l'essai à Abidjan (programme PAC-CI, site ANRS d'Abidjan) et l'équipe du centre de coordination de l'essai à Bordeaux (unité INSERM 593), mandatées par l'ANRS dans le respect de la réglementation en vigueur et des recommandations des Bonnes Pratiques Cliniques.

### 14.2. CONSIGNES POUR LE RECUEIL DES DONNEES

Un cahier de procédure sera distribué à tous les investigateurs, et fera l'objet de réunions de mise en place régulière débutant plusieurs mois avant le début des inclusions et réunissant tous les personnels concernés.

Les données seront recueillies dans un classeur d'observation (un par patient).

Tous les éléments du cahier d'observation devront être complétés par le médecin investigateur ou par son ou ses représentants nommément désigné(s), puis compilés, vérifiés et codés par le technicien d'étude clinique affecté à plein temps à la bonne marche de l'essai dans le centre. Ces éléments seront remis « en main propre » : (i) soit au coursier de l'équipe de coordination de l'essai, qui les transmettra à la secrétaire de saisie du centre de monitoring ; (ii) soit directement à la secrétaire de saisie du centre de monitoring, si le centre de suivi est voisin du centre de monitoring. Après saisie il seront retransportés au centre de suivi par le même circuit, et remis en main propre au technicien d'étude clinique qui les rangera dans le classeur d'observation du participant, sous la responsabilité du médecin investigateur du centre. L'ensemble du circuit entre remplissage de la fiche et archivage dans le dossier ne dépassera pas 48 heures.

Les ordonnances et les résultats d'examen biologique feront l'objet d'un circuit particulier :

- Les ordonnances comporteront trois feuillets : un remis à la personne, un archivé dans la pharmacie du centre, et un restant dans le dossier clinique du patient. Le feuillet de pharmacie sera saisi le jour même dans la pharmacie du centre par « l'aide gestionnaire de pharmacie », sans passer par le centre de monitoring.
- Les résultats d'examens biologiques seront rendus directement par le laboratoire du CeDReS en double exemplaire : (i) un destiné au centre de suivi, où il sera transporté le jour même de son émission par le coursier du centre de monitoring, et archivé dans les 24 heures dans le classeur d'observation du patient sous la supervision du technicien d'étude clinique et sous la responsabilité du médecin investigateur du centre ; (ii) un pour le centre de monitoring, où il sera transporté le jour même de son émission par le coursier du centre de monitoring, puis saisi et archivé.

La transmission/réception des éléments du cahier d'observation et des résultats d'examens biologiques entre chaque acteur sera consignée dans un « cahier de transmission ».

### 14.3. MONITORAGE DES CENTRES INVESTIGATEURS

Après les réunions de mise en place décrites au paragraphe précédent, une assemblée générale d'ouverture réunissant les investigateurs de chaque centre de suivi clinique et biologique aura lieu avant le début des pré-inclusions de l'essai, sous la présidence des investigateurs principaux. Lors de cette ouverture, un classeur contenant les documents officiels de l'essai sera remis à chaque investigateur.

Entre le début des pré-inclusions et la fin de l'essai, une visite de monitoring sera réalisée dans chacun des centres toutes les semaines par le moniteur et le coordinateur.

Ces visites auront pour objet :

- de vérifier que l'essai se déroule conformément au protocole et aux Bonnes Pratiques Cliniques ;
- de discuter les dossiers médicaux posant problème, pour résoudre au mieux ces problèmes et optimiser la prise en charge clinique des participants ;
- de discuter systématiquement tout dossier ayant été jugé d'actualité par l'équipe de monitoring centrale, sur la base des interrogations de la base de l'essai préalable à la visite de monitoring hebdomadaire. Les dossiers d'actualité pourront *par exemple* être, selon les phases de l'essai, les personnes: (i) incluses à tort, ou mises sous traitement à tort ; (ii) des bras 1 et 2 remplissant les critères de mise sous ARV ; (iii) perdues de vue ; (iv) ayant un résultat d'examen biologique nécessitant une attention particulière ; (v) ayant vu leur dossier discuté dans une réunion précédente avec une évolution ou des décisions à suivre ; (vi) ayant modifié leur régime de traitement, etc.
- de préparer la déclaration des événements indésirables graves au promoteur et au centre de monitoring de Bordeaux.

Par ailleurs, le moniteur du centre de coordination et le gestionnaire de base de données, sous la supervision du coordinateur, vérifieront une fois par mois :

- la conformité de 100% des formulaires de consentement éclairé ;
- la tenue à jour des classeurs contenant les documents officiels de l'essai présents dans les centres de suivi et dans le centre de coordination ;
- la qualité des données saisies dans les bases, en terme d'exhaustivité et de conformité aux informations présentes dans les fiches de l'essai, dans les dossiers des patients, et dans les autres tables (par recoupement).

### 14.4. AUDIT - INSPECTION

Audit interne : une visite du moniteur de l'équipe de monitoring de Bordeaux aura lieu deux fois par an. Il aura pour objectif de s'assurer de la qualité de l'essai. Cette visite fera l'objet d'un rapport écrit interne, discuté en réunion des investigateurs et transmis aux membres du conseil scientifique.

Audit du Promoteur : un audit pourra être réalisé à tout moment par des personnes indépendantes des investigateurs, mandatées par l'ANRS ou par les autorités de santé compétentes. Il aura pour objectif de s'assurer de la qualité de l'essai, de la validité de ses résultats et du respect de la loi et des réglementations en vigueur.

## 15. PUBLICATION DES RESULTATS

L'analyse des données fournies par les centres investigateurs sera réalisée par les centres de coordination de l'essai d'Abidjan et de Bordeaux. Cette analyse donnera lieu à des rapports écrits, diffusé au conseil scientifique. Ce rapport permettra la préparation de plusieurs publications ou communications écrites ou orales dont les versions finales devront recevoir l'approbation de tous leurs signataires et des investigateurs principaux.

La publication des résultats principaux mentionnera le nom du promoteur, de tous les investigateurs ayant inclus ou suivi des patients dans l'essai, la composition du conseil scientifique et du comité indépendant de surveillance, et la participation des laboratoires ayant fourni les médicaments aux personnes participant à l'essai. **Les projets de publications écrites et de communications orales seront envoyées pour information à ces laboratoires préalablement à leur soumission, selon les modalités prévues par les engagements contractuels entre ces firmes et l'ANRS.**



## 16. BIBLIOGRAPHIE

1. Lucas SB, Hounnou A, Peacock C, et al. The mortality and pathology of HIV infection in a West African city. *AIDS* 1993; 7:1569-1579.
2. Ackah AN, Coulibaly D, Digbeu H, et al. Response to treatment, mortality, and CD4 lymphocyte counts in HIV-infected persons with tuberculosis in Abidjan, Cote d'Ivoire. *Lancet* 1995; 345:607-10.
3. Colebunders R, Bastian I. A review of the diagnosis and treatment of smear-negative pulmonary tuberculosis. *Int J Tuberc Lung Dis* 2000; 4:97-107.
4. Post FA, Wood R, Pillay GP. Pulmonary tuberculosis in HIV infection: radiographic appearance is related to CD4+ T-lymphocyte count. *Tuber Lung Dis* 1995; 76:518-21.
5. Kramer F, Modilevsky T, Waliyany A, et al. Delayed diagnosis of tuberculosis in patients with human immunodeficiency virus infection. *Am J Med* 1990; 89:451-456.
6. Harries AD, Hargreaves NJ, Gausi F, Kwanjana JH, Salaniponi FM. High early death rate in tuberculosis patients in Malawi. *Int J Tuberc Lung Dis* 2001; 5:1000-5.
7. Korenromp EL, Scano F, Williams BG, Dye C, Nunn P. Effects of human immunodeficiency virus infection on recurrence of tuberculosis after rifampin-based treatment: an analytical review. *Clin Infect Dis* 2003; 37:101-12.
8. Sonnenberg P, Glynn JR, Fielding K, Murray J, Godfrey-Faussett P, Shearer S. How soon after infection with HIV does the risk of tuberculosis start to increase? A retrospective cohort study in South African gold miners. *J Infect Dis* 2005; 191:150-8.
9. Lawn SD, Badri M, Wood R. Tuberculosis among HIV-infected patients receiving HAART: long term incidence and risk factors in a South African cohort. *AIDS* 2005; 19:2109-16.
10. Seyler C, Toure S, Messou E, Bonard D, Gabillard D, Anglaret X. Risk Factors for Active Tuberculosis Following Antiretroviral Treatment Initiation in Abidjan. *Am J Respir Crit Care Med* 2005; 172:123-7.
11. Kwara A, Flanigan TP, Carter EJ. Highly active antiretroviral therapy (HAART) in adults with tuberculosis: current status. *Int J Tuberc Lung Dis* 2005; 9:248-57.
12. Lawn SD, Bekker LG, Miller RF. Immune reconstitution disease associated with mycobacterial infections in HIV-infected individuals receiving antiretrovirals. *Lancet Infect Dis* 2005; 5:361-73.
13. Pape J, Jean S, Ho J, Hafner A, Johnson W. Effect of isoniazide prophylaxis on incidence of active tuberculosis and progression of HIV infection. *Lancet* 1993; 342:268-272.
14. Whalen C, Jonhson J, Okwera A, et al. A trial of three regimens to prevent tuberculosis in Ugandan adults infected with the human immunodeficiency virus. *N Eng J Med* 1997; 337:801-808.
15. Halsey N, Coberly J, Desormeaux J, et al. Randomised trial of isoniazid versus rifampicin and pyrazinamide for prevention of tuberculosis in HIV-1 infection. *Lancet* 1998; 351:786-92.
16. Mwinga A, Hosp M, Godfrey-Faussett P, et al. Twice weekly tuberculosis preventive therapy in HIV infection in Zambia. *AIDS* 1998; 12:2447-2457.
17. Hawken M, Meme H, Elliot L, et al. Isoniazid preventive therapy for tuberculosis in HIV-1-infected adults: results of a randomized controlled trial. *AIDS* 1997; 11:875-882.
18. Gordin F, Chaisson R, Matts J, et al. Rifampin and pyrazinamide vs isoniazid for prevention of tuberculosis in HIV-infected persons: an international randomized trial. *JAMA* 2000; 283:1445-50.
19. Gordin F, Matts J, Miller C, et al. A controlled trial of isoniazid in persons with anergy and human immunodeficiency virus infection who are at high risk for tuberculosis. Terry Beinr Community Programs for Clinical Research on AIDS. *N Engl J Med* 1997; 337:315-320.
20. Bucher H, Griffith L, Guyatt G, et al. Isoniazid prophylaxis for tuberculosis in HIV infection: a meta-analysis of randomized controlled trials. *AIDS* 1999; 13:501-7.
21. World Health Organization, UNAIDS. Preventive therapy against tuberculosis in people living with HIV. *Wkly Epidemiol Rec* 1999; 74:385-400

22. Perriens JH, St Louis ME, Mukadi YB, et al. Pulmonary tuberculosis in HIV-infected patients in Zaire. A controlled trial of treatment for either 6 or 12 months. *N Engl J Med* 1995; 332:779-84.
23. Fitzgerald DW, Desvarieux M, Severe P, Joseph P, Johnson WD, Jr., Pape JW. Effect of post-treatment isoniazid on prevention of recurrent tuberculosis in HIV-1-infected individuals: a randomised trial. *Lancet* 2000; 356:1470-4.
24. Churchyard GJ, Fielding K, Charalambous S, et al. Efficacy of secondary isoniazid preventive therapy among HIV-infected Southern Africans: time to change policy? *AIDS* 2003; 17:2063-70.
25. Anglaret X, Taelman H, Ladner J, Batungwanayo J, Dabis F. Tuberculosis and chemoprophylaxis in Africa. *Lancet* 1995; 345:867-8.
26. Quigley M, Mwinga A, Hosp M, et al. Long-term effect of preventive therapy for tuberculosis in a cohort of HIV-infected Zambian adults. *AIDS* 2001; 15:215-22.
27. Johnson JL, Okwera A, Hom DL, et al. Duration of efficacy of treatment of latent tuberculosis infection in HIV-infected adults. *AIDS* 2001; 15:2137-47.
28. World Health Organization. Scaling up antiretroviral therapy in resource-limited settings: Treatment guidelines for a public health approach; 2003 revision; [http://www.who.int/hiv/pub/prev\\_care/en/arvrevision2003en.pdf](http://www.who.int/hiv/pub/prev_care/en/arvrevision2003en.pdf)
29. World Health Organization. Antiretroviral therapy for HIV infection in adults and adolescents in resource-limited settings: towards universal access. Recommendations for a public health approach. 2006 revision; <http://www.who.int/hiv/pub/guidelines/WHO%20Adult%20ART%20Guidelines.pdf>
30. Anglaret X, Messou E, Ouassa T, et al. Pattern of bacterial diseases in a cohort of HIV-1 infected adults receiving cotrimoxazole prophylaxis in Abidjan, Cote d'Ivoire. *AIDS* 2003; 17:575-84.
31. Whitworth J, Morgan D, Quigley M, et al. Effect of HIV-1 and increasing immunosuppression on malaria parasitaemia and clinical episodes in adults in rural Uganda: a cohort study. *Lancet* 2000; 356:1051-6.
32. World Health Organization. WHO Expert Consultation on Cotrimoxazole Prophylaxis in HIV Infection. WHO technical report series. Reference number: WHO/HIV/2006.01; <http://www.who.int/hiv/pub/meetingreports/ctx/en>
33. Moh R, Danel C, Messou E, et al., Incidence and determinants of mortality and morbidity following early ART initiation in HIV-infected adults in West Africa.; *AIDS* 2007; in press
34. Dosso M, Bonard D, Msellati P, et al. Primary resistance to antituberculosis drugs: a national survey conducted in Cote d'Ivoire in 1995-1996. Ivoirian Study Group on Tuberculosis Resistance. *Int J Tuberc Lung Dis* 1999; 3:805-809.
35. World Health Organization. WHO case definitions of HIV for surveillance and revised clinical staging and immunological classification of HIV-related disease in adults and children. 2006 revision; <http://www.who.int/hiv/pub/guidelines/hivstaging/en/index.html>
36. Rouet F, Ekouevi DK, Chaix ML, et al. Transfer and Evaluation of an Automated, Low-Cost Real-Time Reverse Transcription-PCR Test for Diagnosis and Monitoring of Human Immunodeficiency Virus Type 1 Infection in a West African Resource-Limited Setting. *J Clin Microbiol* 2005;43:2709-17
37. Goldie SJ, Yazdanpanah Y, Losina E, et al. Cost-effectiveness of HIV treatment in resource-poor settings--the case of Cote d'Ivoire. *N Engl J Med* 2006;355:1141-53.
38. Yazdanpanah Y, Losina E, Anglaret X, et al. Clinical impact and cost-effectiveness of co-trimoxazole prophylaxis in patients living with HIV/AIDS in Côte d'Ivoire: a trial-based analysis. *AIDS* 2005;19:1299-308
39. Masquelier B, Neau D, Boucher S, et al. Antiretroviral efficacy and virological profile of a zidovudine/lamivudine/tenofovir disoproxil fumarate combination therapy in antiretroviral-naive patients. *Antivir Ther* 2006;11:827-830.
40. Martin-Carbonero L, Gil P, Garcia-Benayas T, et al. Rate of virologic failure and selection of drug resistance mutations using different triple nucleos(t)ide analogue combinations in HIV-infected patients. *AIDS Res Hum Retroviruses* 2006;22:1231-1235.
41. DART virology group and trial team. Virological response to a triple nucleoside/nucleotide analogue regimen over 48 weeks in HIV-1-infected adults in Africa. *AIDS* 2006;20:1391-1399.
42. Bartlett JA, Fath MJ, Demasi R, et al. An updated systematic overview of triple combination therapy in antiretroviral-naive HIV-infected adults. *AIDS* 2006;20:2051-2064

43. Simonney N, Chavanet P, Perronne C, et al. B-cell immune responses in HIV positive and HIV negative patients with tuberculosis evaluated with an ELISA using a glycolipid antigen. *Tuberculosis* (Edinb) 2007;87:109-22.
44. Lagrange PH, Simonney N, Herrmann JL. [New immunological tests in the diagnosis of tuberculosis]. *Rev Mal Respir* 2007;24:453-72
45. Pocock S.J. Group sequential methods in the design and analysis of clinical trials. *Biometrika* 1977; 64: 191–199.
46. Pocock S.J. *Clinical trials: a practical approach*, Wiley,Chichester, 1983, chapter "10.3 Repeated significance testing group sequential designs", 147-149
47. O'Brien PC, Fleming TR. A multiple testing procedure for clinical trials. *Biometrics* 1979; 35(3): 549–556.
48. Piantadosi S. *Clinical trials : a methodologic perspective*, Wiley, 1997, chapter "10.5.2 Group sequential designs may be easier to construct and apply", 246-248

## Annexe 1

Organisation Mondiale de la Santé (OMS)

### Version révisée de la classification en stades clinique des maladies liées au VIH de OMS (adulte et grand enfant)

Revision 2006

<http://www.who.int/hiv/pub/guidelines/hivstaging/en/index.html>

#### Stade clinique 1

- Patient asymptomatique
- Adénopathies persistantes généralisées

#### Stade clinique 2

- Perte de poids involontaire < 10% du poids corporel
- Dermatite séborrhéique
- Prurigo
- Atteinte fongique des ongles
- Ulcérations buccales récurrentes
- Chéilite angulaire
- Zona
- Infections récidivantes des voies respiratoires supérieures

#### Stade clinique 3

- Perte de poids involontaire  $\geq$  10% du poids corporel
- Diarrhée chronique inexplicée > 1 mois
- Fièvre prolongée inexplicée (> 37,6°C, intermittente ou constante) > 1 mois
- Candidose buccale persistante
- Leucoplasie chevelue buccale
- Tuberculose pulmonaire en cours <sup>(1)</sup>
- Infection bactérienne sévère <sup>(2)</sup>
- Gingivite, périodontite ou stomatite ulcéralive aiguës nécrosantes
- Anémie < 8 g/100ml, neutropénie < 500/mm<sup>3</sup> ou thrombocytopénie < 50000/mm<sup>3</sup> inexplicées

#### Stade clinique 4

- Syndrome cachectique lié au VIH <sup>(3)</sup>
- Pneumopathie à *Pneumocystis carinii*
- Pneumonie bactérienne récurrente
- Herpès cutanéomuqueux > 1 mois, ou Herpès viscéral quelle que soit la durée
- Candidose de l'oesophage, de la trachée, des bronches ou des poumons
- Tuberculose extra-pulmonaire
- Sarcome de Kaposi
- Infection à CMV (retinite, ou viscérale autre)
- Toxoplasmose cérébrale
- Encéphalopathie à VIH

- Cryptococcose extra-pulmonaire
- Mycobactériose atypique disséminée
- Leucoencéphalopathie multifocale progressive
- Cryptosporidiose chronique (avec diarrhée)
- Isosporose chronique
- Mycose endémique disséminée (histoplasmosse, coccidioidomycose)
- Bactériémie à salmonelles non typhiques récurrente
- Lymphome (cérébral ou à cellule B non hodgkien) ou autre tumeur solide associée au VIH
- Carcinome invasif du col utérin
- Leishmaniose viscérale
- Néphropathie ou cardiopathie liée au VIH symptomatique

(1) Au cours du suivi dans l'essai, un nouvel épisode de tuberculose pulmonaire sera considéré comme classant systématiquement au stade 3. **En revanche, les investigateurs ont décidé qu'en pré-inclusion dans l'essai, un épisode de tuberculose pulmonaire survenu dans les deux années précédentes serait considéré comme classant systématiquement au stade 3.** Cette décision a été prise pour ne pas inclure dans l'essai des personnes ayant moins de 350 CD/mm<sup>3</sup> qui auraient eu un épisode récent de tuberculose.

(2) Seront systématiquement considérées comme sévères et classant au stade OMS 3 les épisodes bactériens autres que ceux avec bactériémie à salmonelles récidivante et autres que les pneumonies récidivantes, qui remplissent les critères suivants :

- o épisodes avec bactériémies ;
- o épisodes sans bactériémies mais avec un diagnostic certain ou probable de pneumonie bactérienne, pleurésie bactérienne, entérites avec culture des selles positives pour *Salmonella non-typhi* ou *Shigella* spp., salpyngites bactérienne, pyélonéphrite bactérienne, prostatite bactérienne, orchi-épididymite bactérienne, méningite bactérienne, endocardite bactérienne, pyomyosite bactérienne, péricardite bactérienne, ostéomyélite bactérienne, arthrite bactérienne, pyomyosite bactérienne et abcès bactérien profond<sup>46</sup>.

(3) perte de poids > 10% du poids du corps inexplicquée ET {diarrhée inexplicquée > 1 mois, OU (asthénie chronique ET fièvre > 1 mois)}

## Annexe 2

### ECHELLE ANRS DE COTATION DE LA GRAVITE DES EVENEMENTS INDESIRABLES CHEZ L'ADULTE

Version n° 6 du 9 septembre 2003

Cette échelle de cotation est destinée à :

- ⇒ Grader la gravité d'un symptôme clinique ou biologique observé dans le cadre d'un protocole de recherche biomédicale
- ⇒ Ne pas omettre un événement indésirable grave à déclarer à l'ANRS (classé 4 dans l'échelle de cotation)
- ⇒ Harmoniser les pratiques d'évaluation de la symptomatologie et leur cotation dans les protocoles de l'ANRS

La liste des pathologies évaluées dans les tableaux en pages suivantes n'est pas exhaustive. Pour les pathologies non listées, on peut se référer aux définitions générales suivantes :

|                |                         |                                                                                                                                                            |
|----------------|-------------------------|------------------------------------------------------------------------------------------------------------------------------------------------------------|
| <b>DEGRE 1</b> | <b>ANOMALIE LEGERE</b>  | gêne légère ou transitoire, sans limitation de l'activité quotidienne habituelle ; ne nécessite pas d'intervention médicale ou un traitement correcteur.   |
| <b>DEGRE 2</b> | <b>ANOMALIE MODEREE</b> | limitation partielle de l'activité quotidienne habituelle ; une intervention médicale ou un traitement correcteur ne sont pas obligatoirement nécessaires. |
| <b>DEGRE 3</b> | <b>ANOMALIE SEVERE</b>  | limitation de l'activité quotidienne habituelle ; nécessite une intervention médicale et un traitement correcteur, hospitalisation possible.               |
| <b>DEGRE 4</b> | <b>MENACE VITALE</b>    | activité très limitée ; nécessitant une intervention médicale et un traitement correcteur, presque toujours en milieu hospitalier.                         |

Abréviations utilisées dans les tables :

|                                 |                                      |
|---------------------------------|--------------------------------------|
| <b>IV</b>                       | : Intraveineux                       |
| <b>N</b>                        | : Limite Supérieure de la Normale    |
| <b>EMG</b>                      | : Electromyogramme                   |
| <b>P.A.S</b>                    | : Pression Artérielle Systolique     |
| <b>P.A.D</b>                    | : Pression Artérielle Diastolique    |
| <b>V.E.M.S</b>                  | : Volume Expiratoire Maximal Seconde |
| <b>T.C.A</b>                    | : Temps de Céphaline Activée         |
| <b>Taux de prothrombine (%)</b> | : Correspond au temps de Quick (sec) |

*Ce document a été rédigé par C. Tonéatti (INSERM SC10), Dr A Bouxin-Metro (ANRS) et Pr. J. Dormont (ANRS).  
Il est la propriété exclusive de l'ANRS et ne doit pas être modifié ou publié sans l'accord des auteurs.*

**ECHELLE ANRS DE COTATION DE LA GRAVITE DES EVENEMENTS INDESIRABLES CHEZ L'ADULTE**  
(version n° 6 du 9 septembre 2003)

| DEGRES                                     |                                                         | DEGRE 1<br>Léger | DEGRE 2<br>Modéré | DEGRE 3<br>Sévère                                                                           | DEGRE 4<br>Menace vitale                              |
|--------------------------------------------|---------------------------------------------------------|------------------|-------------------|---------------------------------------------------------------------------------------------|-------------------------------------------------------|
| <b>HEMATOLOGIE</b>                         |                                                         |                  |                   |                                                                                             |                                                       |
| 1                                          | Hémoglobine (g/dl)                                      | 8,0 – 9,40       | 7,0 – 7,99        | 6,5 – 6,99                                                                                  | < 6,50                                                |
| 2                                          | Leucocytes (/mm <sup>3</sup> )                          | 3 000 – 3 900    | 2 000 – 2 999     | 1 000 – 1 999                                                                               | < 1 000                                               |
| 3                                          | Neutrophiles (/mm <sup>3</sup> )                        | 1 000 – 1 500    | 750 – 999         | 500 – 749                                                                                   | < 500                                                 |
| 4                                          | Plaquettes (/mm <sup>3</sup> )                          | 75 000 – 99 000  | 50 000 – 74 999   | 20 000 – 49 999                                                                             | <20 000 ou pétéchies diffuses                         |
| 5                                          | Taux de Prothrombine (%)                                | /                | 45 – ≤ 70         | 20 – < 45                                                                                   | < 20                                                  |
| 6                                          | T.C.A                                                   | 1,0 – 1,66 x N   | > 1,66 – 2,33 x N | > 2,33 – 3,00 x N                                                                           | > 3,00 x N                                            |
| <b>BIOCHIMIE</b>                           |                                                         |                  |                   |                                                                                             |                                                       |
| <i>Biochimie Hépatique et pancréatique</i> |                                                         |                  |                   |                                                                                             |                                                       |
| 7                                          | AST (SGOT) (UI/l)                                       | 1,25 – 2,50 x N  | > 2,50 – 5,00 x N | > 5,00 – 10,00 x N                                                                          | > 10,00 x N                                           |
| 8                                          | ALT (SGPT) (UI/l)                                       | 1,25 – 2,50 x N  | > 2,50 – 5,00 x N | > 5,00 – 10,00 x N                                                                          | > 10,00 x N                                           |
| 9                                          | GAMMA GT (UI/l)                                         | 1,25 – 2,50 x N  | > 2,50 – 5,00 x N | > 5,00 – 10,00 x N                                                                          | > 10,00 x N                                           |
| 10                                         | Phosphatases alcalines (UI/l)                           | 1,25 – 2,50 x N  | > 2,50 – 5,00 x N | > 5,00 – 10,00 x N                                                                          | > 10,00 x N                                           |
| 11                                         | Hyperbilirubinémie (μmol/l)                             | 1,25 – 2,50 x N  | > 2,50 – 5,00 x N | > 5,00 – 10,00 x N                                                                          | > 10,00 x N                                           |
| 12                                         | Amylasémie (UI/l) / <b>Lipasémie (UI/l)/Pancréatite</b> | ≥1,25 – 2,50 x N | > 2,50 – 5,00 x N | > 3,00x N avec douleur abdominale aiguë et/ou imagerie évocatrices d'une pancréatite aiguë. | > 3,00 x N avec douleur abdominale et signes de choc. |
| 13                                         | CPK (UI/l)                                              | 1,25 – 2,50 x N  | > 2,50 – 5,00 x N | > 5,00 – 10,00 x N                                                                          | > 10,00 x N                                           |
| <i>Bilan lipidique</i>                     |                                                         |                  |                   |                                                                                             |                                                       |
| 14                                         | Hypertriglycémie (mmol/l)                               | /                | 4,50 – 8,59       | 8,60 – 13,70                                                                                | > 13,70                                               |
| 15                                         | Hypercholestérolémie (mmol/l)                           | >N -7,75         | >7,75 – 10,34     | >10,34 – 12,92                                                                              | >12,92                                                |

**ECHELLE ANRS DE COTATION DE LA GRAVITE DES EVENEMENTS INDESIRABLES CHEZ L'ADULTE**  
(version n° 6 du 9 septembre 2003)

| DEGRES                                                               |                                                       | DEGRE 1<br>Léger                              | DEGRE 2<br>Modéré                              | DEGRE 3<br>Sévère                    | DEGRE 4<br>Menace vitale                                |
|----------------------------------------------------------------------|-------------------------------------------------------|-----------------------------------------------|------------------------------------------------|--------------------------------------|---------------------------------------------------------|
| <b>Electrolytes / Evaluation de la fonction rénale / Métabolisme</b> |                                                       |                                               |                                                |                                      |                                                         |
| 16                                                                   | Hyponatrémie (mEq/l)                                  | 130 – 135                                     | 123 – 129                                      | 116 – 122                            | <116                                                    |
| 17                                                                   | Hypernatrémie (mEq/l)                                 | 146 – 150                                     | 151 – 157                                      | 158 – 165                            | >165                                                    |
| 18                                                                   | Hypokaliémie (mEq/l)                                  | 3,2 – 3,4                                     | 2,8 – 3,1                                      | 2,5 – 2,7                            | <2,5                                                    |
| 19                                                                   | Hyperkaliémie (mEq/l)                                 | 5,6 – 6,0                                     | 6,1 – 6,5                                      | 6,6 – 7,0                            | >7,0                                                    |
| 20                                                                   | Bicarbonate (mEq/l ou mmol/l)                         | 20,00 – 24,00                                 | 15,00 – 19,99                                  | 10,00 – 14,99                        | < 10,00                                                 |
| 21                                                                   | Créatininémie (µmol/l)                                | 1,00 – 1,50 x N                               | > 1,50 – 3,00 x N                              | > 3,00 – 6,00 x N                    | 6,00 x N ou dialyse requise                             |
| 22                                                                   | Urée sanguine (UI/l)                                  | 1,25 – 2,5 x N                                | 2,6 – 5,0 x N                                  | 5,1 – 10 x N                         | > 10 x N                                                |
| 23                                                                   | Hypocalcémie (mmol/l)                                 | 1,95 – 2,10                                   | 1,75 – 1,94                                    | 1,50 – 1,74                          | < 1,50                                                  |
| 24                                                                   | Hypercalcémie (mmol/l)                                | 2,65 – 2,87                                   | 2,88 – 3,13                                    | 3,14 – 3,38                          | > 3,38                                                  |
| 25                                                                   | Hypophosphatémie (mg/dl)                              | 2,0 – 2,4                                     | 1,5 – 1,9                                      | 1,0 – 1,4                            | <1,0                                                    |
| 26                                                                   | Hyperuricémie (µmol/l)                                | 1,25 – 2,00 x N                               | > 2,00 – 5,00 x N                              | > 5,0 – 10,00 x N                    | > 10,00 x N                                             |
| 27                                                                   | Hypoglycémie (mmol/l)                                 | 3,1 – 3,6                                     | 2,2 – 3,0                                      | 1,7 – 2,1                            | < 1,7                                                   |
| 28                                                                   | Hyperglycémie (mmol/l)                                | 6,1 – 7,0                                     | > 7,0 – 16,5                                   | > 16,5 sans cétose.                  | Cf diabète<br>Item n°53 (degré 4)                       |
| 29                                                                   | Lactate (mmol/l)<br>(prélèvement sur sang<br>veineux) | 2,0 – 2,99*                                   | 3,00 – 3,99**                                  | 4,00 – 4,99**                        | ≥ 5,00***                                               |
| <b>Biochimie Urinaire</b>                                            |                                                       |                                               |                                                |                                      |                                                         |
| 30                                                                   | Protéinurie (bandelettes)                             | +                                             | ++                                             | ≥ +++                                | Syndrome néphrotique                                    |
| 31                                                                   | Hématurie                                             | ≥ 80 hématies/µl<br>à la bandelette réactive. | ≥ 200 hématies/µl<br>à la bandelette réactive. | Macroscopique avec ou sans caillots. | Obstructive ou nécessitant une<br>transfusion sanguine. |

\* Lactatémie de degré 1 : Un dosage de confirmation est nécessaire dans les 8 à 10 jours

\*\* Lactatémie de degré 2, 3 : Un dosage de confirmation est nécessaire dès le lendemain.

\*\*\* Lactatémie de degré 4 : Un dosage de confirmation est nécessaire immédiatement.



**ECHELLE ANRS DE COTATION DE LA GRAVITE DES EVENEMENTS INDESIRABLES CHEZ L'ADULTE**  
(version n° 6 du 9 septembre 2003)

| DEGRES                                                          |              | DEGRE 1<br>Léger                                                | DEGRE 2<br>Modéré                                                             | DEGRE 3<br>Sévère                                                                                 | DEGRE 4<br>Menace vitale                                          |
|-----------------------------------------------------------------|--------------|-----------------------------------------------------------------|-------------------------------------------------------------------------------|---------------------------------------------------------------------------------------------------|-------------------------------------------------------------------|
| <b>Troubles Gastro-intestinaux / Hépatiques / Pancréatiques</b> |              |                                                                 |                                                                               |                                                                                                   |                                                                   |
| 32                                                              | Nausée       | Transitoire,<br>alimentation normale.                           | Alimentation limitée<br>durant moins de 3 jours.                              | Alimentation limitée<br>durant plus de 3 jours.                                                   | Alimentation limitée aux<br>liquides.<br>Hospitalisation requise. |
| 33                                                              | Vomissement  | Transitoire :<br>2 – 3 épisodes / jour ou<br>durée ≤ 1 semaine. | Répété :<br>4 – 5 épisodes / jour ou<br>durée > 1 semaine.                    | Vomissement solides/liquides<br>pendant 24 h.<br>Hypotension orthostatique.<br>Perfusion requise. | Hospitalisation pour choc<br>hypovolémique.                       |
| 34                                                              | Diarrhée     | Transitoire,<br>3 – 4 selles / jour,<br>diarrhée ≤ 1 semaine.   | Persistante,<br>5-7 selles / jour,<br>diarrhée > 1 semaine.                   | > 7 selles / jour ou nécessitant une<br>perfusion.<br>Selles sanglantes.                          | Hospitalisation,<br>choc hypovolémique,<br>perfusion.             |
| 35                                                              | Constipation | /                                                               | Douleur abdominale modérée 78 h sans<br>selles.<br>Nécessitant un traitement. | Météorisme.<br>Nécessité d'un traitement évacuateur<br>ou traitement en milieu hospitalier.       | Météorisme avec vomissement<br>ou occlusion.                      |
| 36                                                              | Dysphagie    | Inconfort léger, en déglutissant.                               | Difficulté pour avaler mais alimentation<br>possible.                         | Incapacité à avaler les solides.                                                                  | Incapacité à avaler les liquides,<br>perfusion requise.           |
| 37                                                              | Œsophagite   | Pyrosis survenant moins d'une fois par<br>semaine               | Pyrosis survenant au moins une fois par<br>semaine mais amélioré par les IPP* | Pyrosis survenant au moins une fois<br>par semaine non amélioré par les<br>IPP*                   | Intolérance alimentaire et<br>vomissements                        |

\*IPP : Inhibiteurs de la Pompe à Protons

## ECHELLE ANRS DE COTATION DE LA GRAVITE DES EVENEMENTS INDESIRABLES CHEZ L'ADULTE

| DEGRES                        |                                                    | DEGRE 1<br>Léger                                                                                   | DEGRE 2<br>Modéré                                                                                                                                                                                                                                                                                                                                                                                                                                                                                   | DEGRE 3<br>Sévère                                                                                                                                                                                                                                                                                                                                | DEGRE 4<br>Menace vitale                                                                                                                                                                                                                                                                                                                                                                                                                                                       |
|-------------------------------|----------------------------------------------------|----------------------------------------------------------------------------------------------------|-----------------------------------------------------------------------------------------------------------------------------------------------------------------------------------------------------------------------------------------------------------------------------------------------------------------------------------------------------------------------------------------------------------------------------------------------------------------------------------------------------|--------------------------------------------------------------------------------------------------------------------------------------------------------------------------------------------------------------------------------------------------------------------------------------------------------------------------------------------------|--------------------------------------------------------------------------------------------------------------------------------------------------------------------------------------------------------------------------------------------------------------------------------------------------------------------------------------------------------------------------------------------------------------------------------------------------------------------------------|
| <b>Troubles respiratoires</b> |                                                    |                                                                                                    |                                                                                                                                                                                                                                                                                                                                                                                                                                                                                                     |                                                                                                                                                                                                                                                                                                                                                  |                                                                                                                                                                                                                                                                                                                                                                                                                                                                                |
| 38                            | Bronchospasme.                                     | Transitoire,<br>pas de traitement,<br>VEMS 70 % - < 80 %.                                          | Permanent,<br>amélioration sous<br>bronchodilatateur<br>VEMS 50 % - < 70 %.                                                                                                                                                                                                                                                                                                                                                                                                                         | Persistant sous bronchodilatateur.<br>VEMS 25 % - < 50 %.                                                                                                                                                                                                                                                                                        | Cyanose,<br>VEMS < 25 %<br>intubation.                                                                                                                                                                                                                                                                                                                                                                                                                                         |
| 39                            | Dyspnée.                                           | Dyspnée à l'effort.                                                                                | Dyspnée au cours de<br>l'activité habituelle.                                                                                                                                                                                                                                                                                                                                                                                                                                                       | Dyspnée de repos.                                                                                                                                                                                                                                                                                                                                | Dyspnée nécessitant une assistance respiratoire.                                                                                                                                                                                                                                                                                                                                                                                                                               |
| <b>Troubles musculaires</b>   |                                                    |                                                                                                    |                                                                                                                                                                                                                                                                                                                                                                                                                                                                                                     |                                                                                                                                                                                                                                                                                                                                                  |                                                                                                                                                                                                                                                                                                                                                                                                                                                                                |
| 40                            | Myalgies<br>(en dehors d'un point<br>d'injection). | Myalgies légères pendant moins<br>de 4 semaines et ne nécessitant<br>pas de traitement antalgique. | Présence d'un des signes suivants :<br>1 – Myalgies légères à modérées<br>pendant plus de 4 semaines et/ou<br>pouvant nécessiter un traitement<br>par antalgiques de niveau I*.<br>2 – Prédominance des troubles à<br>l'effort (difficulté à monter les<br>escaliers ou à se relever de la<br>position assise).<br>Peut marcher sans assistance.<br>Confirmation optionnelle par<br>recherche d'anomalie biologique<br>(CPK), électromyographique<br>(EMG) ou histologique<br>(biopsie musculaire). | Présence d'un des signes<br>suivants :<br>1 – Myalgies modérées à sévères<br>pendant plus de 4 semaines<br>nécessitant un traitement par<br>antalgiques de niveau I/II*.<br>2 – Aide nécessaire pour la<br>marche et les activités de la vie<br>quotidienne.<br>Confirmation paraclinique<br>recommandée (CPK, EMG et/ou<br>biopsie musculaire). | Présence d'un des signes suivants :<br>1 – Myalgies sévères non liées à l'effort<br>nécessitant un traitement par antalgiques de<br>niveau II/III*.<br>2 – Faiblesse musculaire rendant la marche<br>impossible sans assistance.<br>3 – Rhabdomyolyse aiguë avec nécrose<br>musculaire et œdème,<br>4 – Rhabdomyolyse aiguë avec perturbations<br>électrolytiques et insuffisance rénale.<br>Confirmation paraclinique nécessaire<br>(biologie, EMG et/ou biopsie musculaire). |

\* Antalgiques de niveau I

:

*Antalgiques périphériques (paracétamol et/ou salicylés ou AINS) ;*

\* Antalgiques de niveau II

:

*Opiacés d'action faible (codéine, dextropropoxyphène), agonistes-antagonistes morphiniques (buprénorphine, nalbuphine) ;*

\* Antalgiques de niveau III

:

*Morphine.**(version n° 6 du 9 septembre 2003)*

**ECHELLE ANRS DE COTATION DE LA GRAVITE DES EVENEMENTS INDESIRABLES CHEZ L'ADULTE**  
(version n° 6 du 9 septembre 2003)

| DEGRES                            |                                                      | DEGRE 1<br>Léger                                                                  | DEGRE 2<br>Modéré                                                                                            | DEGRE 3<br>Sévère                                                                                                                                           | DEGRE 4<br>Menace vitale                                                                             |
|-----------------------------------|------------------------------------------------------|-----------------------------------------------------------------------------------|--------------------------------------------------------------------------------------------------------------|-------------------------------------------------------------------------------------------------------------------------------------------------------------|------------------------------------------------------------------------------------------------------|
| <i>Troubles cardiovasculaires</i> |                                                      |                                                                                   |                                                                                                              |                                                                                                                                                             |                                                                                                      |
| 41                                | Hypertension artérielle                              | Transitoire ou permanente ; P.A augmentée ≤ 20 mmHg, et PAS 140-150 ou PAD 90-99. | Permanente P.A augmentée > 20 mmHg et PAS 160-179 ou PAD 100-109.                                            | Permanente. PAS ≥ 180 ou PAD > 110                                                                                                                          | Hypertension artérielle maligne ou accélérée.                                                        |
| 42                                | Hypotension orthostatique                            | P.A systolique diminuée ≤ 20 mmHg en position orthostatique. Pas de traitement.   | P.A systolique diminuée > 20 mmHg, durable mais corrigée par apport liquidien per os.                        | Perfusion requise.                                                                                                                                          | Choc hypovolémique, nécessitant une hospitalisation.                                                 |
| 43                                | Troubles du rythme cardiaque ventriculaires          | /                                                                                 | Extrasystoles ventriculaires isolées, pas de traitement, symptomatiques ou non.                              | Troubles du rythme cardiaque récurrents, persistants, ou symptomatiques. Nécessitant un traitement.                                                         | Arythmie nécessitant une hospitalisation.                                                            |
| 44                                | Allongement de l'intervalle QTc                      | /                                                                                 | Homme : >450 et < 500 ms<br>Femme : >470 et <500 ms                                                          | >500ms                                                                                                                                                      | >500 ms avec manifestations cliniques (troubles du rythme ventriculaire, syncope, torsade de pointe) |
| 45                                | Ischémie cardiaque                                   | /                                                                                 | Douleur atypique en cours d'exploration.                                                                     | Apparition d'un angor d'effort, contrôlé sous traitement.                                                                                                   | Infarctus du myocarde, angor instable, syndrome de menace.                                           |
| 46                                | Péricardite                                          | Découverte fortuite d'un petit épanchement à l'échographie                        | Epanchement modéré peu symptomatique. Pas de traitement ou d'intervention jugés nécessaires dans l'immédiat. | Epanchement modéré ou important symptomatique mais sans tamponnade. Traitement indiqué et hospitalisation à considérer (ou prolongation d'hospitalisation). | Tamponnade. Hospitalisation et intervention nécessaires.                                             |
| 47                                | Accident vasculaire cérébral.                        | /                                                                                 | /                                                                                                            | Accident ischémique transitoire (syndrome neurologique focal régressant < 24 h).                                                                            | Accident vasculaire cérébral non régressif en 24 h.                                                  |
| 48                                | Embolie artérielle périphérique                      | /                                                                                 | /                                                                                                            | /                                                                                                                                                           | Embolie artérielle périphérique. Hospitalisation. Traitement adapté.                                 |
| 49                                | Thrombose veineuse profonde et/ou embolie pulmonaire | /                                                                                 | /                                                                                                            | Thrombose veineuse profonde. Traitement anticoagulant. Hospitalisation à considérer.                                                                        | Embolie pulmonaire. Hospitalisation et traitements adaptés à la situation.                           |

**ECHELLE ANRS DE COTATION DE LA GRAVITE DES EVENEMENTS INDESIRABLES CHEZ L'ADULTE**  
(version n° 6 du 9 septembre 2003)

| DEGRES                       |                                                                                      | DEGRE 1<br>Léger                                                                           | DEGRE 2<br>Modéré                                                                                                    | DEGRE 3<br>Sévère                                                                                                                                                                 | DEGRE 4<br>Menace vitale                                                                                                                                                                                                             |
|------------------------------|--------------------------------------------------------------------------------------|--------------------------------------------------------------------------------------------|----------------------------------------------------------------------------------------------------------------------|-----------------------------------------------------------------------------------------------------------------------------------------------------------------------------------|--------------------------------------------------------------------------------------------------------------------------------------------------------------------------------------------------------------------------------------|
| <b>Troubles endocriniens</b> |                                                                                      |                                                                                            |                                                                                                                      |                                                                                                                                                                                   |                                                                                                                                                                                                                                      |
| 50                           | Hyperthyroïdie                                                                       | Hyperthyroïdie infraclinique.<br>TSH basse.<br>T3 et T4 libres normales.                   | Thyrotoxicose modérée non compliquée.<br>Traitement indiqué.                                                         | Exophtalmie maligne.<br>Arythmie cardiaque.<br>Myopathie.                                                                                                                         | Crise thyrotoxique et/ou insuffisance cardiaque.                                                                                                                                                                                     |
| 51                           | Hypothyroïdie                                                                        | Hypothyroïdie infraclinique. TSH augmentée mais inférieure à 12 mU/l.<br>T4 libre normale. | Hypothyroïdie franche sans complications. Traitement nécessaire.                                                     | Hypothyroïdie sévère avec signes cliniques multiples. Traitement urgent. Hospitalisation à considérer.                                                                            | Coma myxoedemateux.                                                                                                                                                                                                                  |
| 52                           | Diabète/Hyperglycémie                                                                | Hyperglycémie modérée à jeun entre 6,1 et 7 mmol/l. Pas de traitement immédiat.            | Glycémie à jeun >7 mmol/l.<br>Nécessité de régime alimentaire éventuellement complété par des antidiabétiques oraux. | Glycémie à jeun >16,5 mmol/l avec ou sans signes cliniques.<br>Insulinothérapie indiquée.                                                                                         | Acidocétose ou hyperosmolarité (>27,8 mmol/l sans acidose).                                                                                                                                                                          |
| <b>Troubles cutanés</b>      |                                                                                      |                                                                                            |                                                                                                                      |                                                                                                                                                                                   |                                                                                                                                                                                                                                      |
| 53                           | Eruptions cutanées et/ou muqueuses.                                                  | Erythème, prurit modérés.                                                                  | Eruption étendue maculo-papuleuse avec ou sans prurit.                                                               | Eruption étendue papulo-vésiculeuse ou suintante.<br>Purpura palpable (évocateur de vascularite).<br>Erythème polymorphe.<br>Ulcérations cutanées ou muqueuses de faible étendue. | Toute atteinte cutanée et/ou muqueuse bulleuse (type Lyell ou Stevens-Johnson).<br>Erythrodermie fébrile accompagnée ou non d'autres signes évoquant une hypersensibilité.<br>Nécrose cutanée nécessitant une excision chirurgicale. |
| 54                           | Manifestations d'hypersensibilité immédiate s'accompagnant ou non de signes cutanés. | /                                                                                          | Urticaire aiguë localisée.                                                                                           | Urticaire géante, œdème de Quincke.                                                                                                                                               | Choc anaphylactique.                                                                                                                                                                                                                 |

**ECHELLE ANRS DE COTATION DE LA GRAVITE DES EVENEMENTS INDESIRABLES CHEZ L'ADULTE**  
(version n° 6 du 9 septembre 2003)

| DEGRES                        |                                   | DEGRE 1<br>Léger                                                                                       | DEGRE 2<br>Modéré                                                                                                            | DEGRE 3<br>Sévère                                                                                                                                                             | DEGRE 4<br>Menace vitale                                                                                                             |
|-------------------------------|-----------------------------------|--------------------------------------------------------------------------------------------------------|------------------------------------------------------------------------------------------------------------------------------|-------------------------------------------------------------------------------------------------------------------------------------------------------------------------------|--------------------------------------------------------------------------------------------------------------------------------------|
| <b>Troubles Neurologiques</b> |                                   |                                                                                                        |                                                                                                                              |                                                                                                                                                                               |                                                                                                                                      |
| 55                            | Veille / sommeil                  | Difficultés mineures d'attention et de concentration.                                                  | Somnolence diurne et/ou difficultés d'endormissement et/ou réveils nocturnes, réduction de l'activité mentale, obnubilation. | Modification du rythme veille/sommeil ou insomnie nécessitant un traitement ou modification du contenu des rêves. Syndrome confusionnel avéré avec désorientation temporelle. | Désorganisation totale du rythme veille/sommeil ne répondant pas au traitement.<br>Syndrome confuso-onirique, coma et/ou convulsion. |
| 56                            | Psychisme                         | Anxiété mineure.                                                                                       | Anxiété nécessitant un traitement ou dépression modérée.                                                                     | Anxiété majeure ou épisode dépressif caractérisé nécessitant un traitement.                                                                                                   | Psychose aiguë avec hospitalisation y compris idées suicidaires, état maniaque, délire hallucinatoire.                               |
| 57                            | Céphalées                         | Episodiques, pas de traitement.                                                                        | Nécessitant des antalgiques niveau I*.                                                                                       | Nécessitant des antalgiques niveau II* minimum.                                                                                                                               | Non contrôlées, même sous antalgiques niveau III*.                                                                                   |
| 58                            | Paresthésies                      | Paresthésie, douleur discrète, pas de traitement.                                                      | Paresthésie, douleur permanente d'intensité modérée, nécessitant des antalgiques de niveau I*.                               | Paresthésie, douleur permanente d'intensité sévère, nécessitant des antalgiques niveau II* minimum.                                                                           | Douleur insupportable invalidante, restreignant l'activité malgré la prise d'antalgiques niveau III*.                                |
| 59                            | Déficit moteur                    | Sensation de faiblesse, pas de déficit objectif, pas de modification des réflexes.                     | Déficit moteur distal, gêne fonctionnelle modérée ou modification des réflexes.                                              | Déficit moteur marqué interférant avec l'activité habituelle.                                                                                                                 | Confinement au lit ou au fauteuil roulant en raison du déficit moteur.                                                               |
| 60                            | Troubles du contrôle du mouvement | Maladresse occasionnelle, troubles légers de la coordination.                                          | Tremblements ou dyskinésie, ou dysmétrie, ou dysarthrie, retentissement modéré sur l'activité quotidienne.                   | Ataxie des membres supérieurs ou inférieurs ou mouvements anormaux, retentissement sur l'activité quotidienne.                                                                | Incapacité à se tenir debout.<br>Dépendance totale.                                                                                  |
| 61                            | Déficit sensitif                  | Déficit mineur de la sensibilité quelle que soit sa modalité et sa distribution, focale ou symétrique. | Déficit modéré de la sensibilité.                                                                                            | Déficit sévère de la sensibilité.                                                                                                                                             | Perte de sensibilité étendue au tronc et aux quatre membres.                                                                         |

\*Antalgiques de niveau I :

\*Antalgiques de niveau II :

\*Antalgiques de niveau III :

*Antalgiques périphériques (paracétamol et/ou salicylés ou AINS)**Opiacés d'action faible (codéine, dextropropoxyphène), agonistes-antagonistes morphiniques (buprénorphine, nalbuphine)**Morphine*

**ECHELLE ANRS DE COTATION DE LA GRAVITE DES EVENEMENTS INDESIRABLES CHEZ L'ADULTE**  
(version n° 6 du 9 septembre 2003)

| DEGRES        |                                                        | DEGRE 1<br>Léger                                                                 | DEGRE 2<br>Modéré                                                                   | DEGRE 3<br>Sévère                                                                            | DEGRE 4<br>Menace vitale                                                                       |
|---------------|--------------------------------------------------------|----------------------------------------------------------------------------------|-------------------------------------------------------------------------------------|----------------------------------------------------------------------------------------------|------------------------------------------------------------------------------------------------|
| <i>Divers</i> |                                                        |                                                                                  |                                                                                     |                                                                                              |                                                                                                |
| 62            | Température (voie orale) persistant plus de 12 h (°C). | 37,7 – 38,9                                                                      | 39 – 39,5                                                                           | 39,6 – 40,5                                                                                  | > 40,5                                                                                         |
| 63            | Coliques néphrétiques.                                 | Régression spontanée des symptômes.<br>Douleur ne nécessitant pas de traitement. | Colique nécessitant un traitement médical.                                          | Syndrome obstructif qui ne disparaît pas spontanément.                                       | /                                                                                              |
| 64            | Fatigue.                                               | Limitation de l'activité quotidienne habituelle à < 25 % pendant moins de 48 h.  | Activité quotidienne habituelle réduite entre 25 – 50 % pendant plus de 48 h.       | Activité quotidienne habituelle réduite > 50 %, ne peut pas travailler pendant plus de 48 h. | Incapable de s'occuper de soi-même.<br>Besoin d'aide pour les activités de la vie quotidienne. |
| 65            | Arthrite / Arthralgie.                                 | Arthralgie.                                                                      | Arthralgie avec ou sans épanchement articulaire ou avec gêne fonctionnelle modérée. | Arthrite franche avec ou sans épanchement ou entraînant une gêne fonctionnelle importante.   | /                                                                                              |
| 66            | Troubles oculaires                                     | Hyperémie conjonctivale.                                                         | Douleur modérée.<br>Conjonctivite.                                                  | Diminution de l'acuité visuelle.<br>Uvéite.<br>Douleur sévère. Glaucome.                     | /                                                                                              |

## Annexe 3

# Critères diagnostiques pour les pathologies autres que la tuberculose

Version du 15 Mars 2005 \*, adaptée de :

- World Health Organization. WHO case definitions of HIV for surveillance and revised clinical staging and immunological classification of HIV-related disease in adults and children. 2006 revision; <http://www.who.int/hiv/pub/guidelines/hivstaging/en/index.htm>
- Anglaret X, Messou E, Ouassa T, et al. Pattern of bacterial diseases in a cohort of HIV-1 infected adults receiving cotrimoxazole prophylaxis in Abidjan, Cote d'Ivoire. AIDS 2003; 17:575-84.
- Anglaret X, Dakoury-Dogbo N, Bonard D, et al. Causes and empirical treatment of fever in HIV-infected adult outpatients, Abidjan, Cote d'Ivoire. AIDS 2002;16:909-18

| Diagnostic <sup>(1)</sup>          | Possible                                                                                                                                                                                                                                                                                                                                 | Certain                                                                                                                                                                                                                                                                                                                            |
|------------------------------------|------------------------------------------------------------------------------------------------------------------------------------------------------------------------------------------------------------------------------------------------------------------------------------------------------------------------------------------|------------------------------------------------------------------------------------------------------------------------------------------------------------------------------------------------------------------------------------------------------------------------------------------------------------------------------------|
| <b>Pneumocystose pulmonaire</b>    | (i) Dyspnée ou toux non productive évoluant depuis moins de 3 mois, (ii) pneumopathie bilatérale diffuse à la radio de thorax, (iii) absence de mise en évidence microbiologique d'une autre cause                                                                                                                                       | (i) Tableau clinique compatible, (ii) présence de <i>Pneumocystis carinii</i> sur une expectoration induite ou un lavage broncho-alvéolaire                                                                                                                                                                                        |
| <b>Pneumopathie bactérienne</b>    | (i) Tableau clinique compatible, (ii) pneumopathie alvéolaire sur la radio de thorax, et (iii) guérison sous antibiothérapie standard n'ayant pas d'activité sur <i>Pneumocystis carinii</i>                                                                                                                                             | (i) Tableau clinique compatible, (ii) pneumopathie alvéolaire sur la radio de thorax ou radio de thorax non réalisée, et (iii) mise en évidence de <i>Streptococcus pneumoniae</i> ou <i>Haemophilus influenzae</i> sur des hémoculture ou sur un lavage broncho-alvéolaire                                                        |
| <b>Pneumopathie non spécifique</b> | (i) Tableau clinique compatible, (ii) anomalies parenchymateuses sur la radio de thorax, (iii) absence de mise en évidence microbiologique d'une cause, (iii) tableau ne correspondant pas aux critères de pneumocystose possible, et (iv) absence de guérison sous antibiothérapie standard et sous traitement antituberculeux standard | Non applicable                                                                                                                                                                                                                                                                                                                     |
| <b>Bronchite non spécifique</b>    | (i) Tableau de toux et râles bronchiques avec ou sans fièvre, (ii) absence de signe clinique et/ou radiologique d'atteinte pleurale ou parenchymateuse ou radio non pratiquée, et (iii) disparition des signes sans traitement ou sous antibiothérapie standard                                                                          | Non applicable                                                                                                                                                                                                                                                                                                                     |
| <b>Sinusite bactérienne</b>        | (i) Tableau clinique compatible, et (ii) opacité radiologique caractéristique au niveau d'au moins un sinus maxillaire ou frontal                                                                                                                                                                                                        | (i) Tableau clinique compatible, (ii) opacité radiologique caractéristique au niveau d'au moins un sinus maxillaire ou frontal, et (iii) identification de <i>Streptococcus pneumoniae</i> ou <i>Haemophilus influenzae</i> sur une hémoculture                                                                                    |
| <b>Otite bactérienne</b>           | Tableau clinique compatible incluant un aspect otoscopique caractéristique                                                                                                                                                                                                                                                               | (i) Tableau clinique compatible, (ii) identification de <i>Streptococcus pneumoniae</i> ou <i>Haemophilus influenzae</i> sur une hémoculture-                                                                                                                                                                                      |
| <b>Mycobactériose atypique</b>     | Non applicable                                                                                                                                                                                                                                                                                                                           | (i) Tableau clinique compatible, et (ii) identification de <i>Mycobacterium avium</i> , <i>M. intracellulare</i> , ou <i>M. kansasii</i> sur un liquide organique normalement stérile ou sur un prélèvement de tissu autre que d'origine pulmonaire (liquide pleural ou péritonéal, ganglion, biopsie hépatique, LCR, hémoculture) |

| Diagnostic <sup>(1)</sup>                    | Possible                                                                                                                                                                                                                                                                                               | Certain                                                                                                                                                                                                                                                                                                                                                                                        |
|----------------------------------------------|--------------------------------------------------------------------------------------------------------------------------------------------------------------------------------------------------------------------------------------------------------------------------------------------------------|------------------------------------------------------------------------------------------------------------------------------------------------------------------------------------------------------------------------------------------------------------------------------------------------------------------------------------------------------------------------------------------------|
| <b>Entérite bactérienne</b>                  | Non applicable                                                                                                                                                                                                                                                                                         | (i) Au moins 3 selles par jour pendant plus de deux jours , et (ii) identification de <i>salmonella</i> sp, ou <i>Shigella</i> sp sur une coproculture et/ou une hémoculture, ou de <i>Yersinia</i> sp, <i>Vibrio cholerae</i> , ou <i>Campylobacter</i> sp sur une coproculture                                                                                                               |
| <b>Isosporose</b>                            | Non applicable                                                                                                                                                                                                                                                                                         | (i) Au moins 3 selles par jour pendant plus de deux jours , et (ii) mise en évidence d' <i>Isospora belli</i> sur un examen direct de selles                                                                                                                                                                                                                                                   |
| <b>Autre entérite parasitaire</b>            | Non applicable                                                                                                                                                                                                                                                                                         | (i) Au moins 3 selles par jour pendant plus de deux jours , et (ii) mise en évidence de <i>Shistosoma</i> sp, <i>Giardia</i> sp, <i>Ankylostomia</i> sp, <i>Entamoeba histolytica</i> or <i>Strongyloides</i> sp sur un examen direct de selles, ou (ii) identification de <i>Cryptosporidium</i> sp après coloration de Ziehl-Nelsen modifiée, ou de Microsporidia après coloration trichrome |
| <b>Entérite non spécifique</b>               | (i) Au moins 3 selles par jour pendant plus de deux jours , et (ii) absence de critères « d'isosporose », « d'autre entérite parasitaire », ou « d'entérite bactérienne »                                                                                                                              | Non applicable                                                                                                                                                                                                                                                                                                                                                                                 |
| <b>Candidose bucco-pharyngée</b>             | (i) lésions érythémateuses évocatrices du palais, du pharynx ou de la face interne des joues, et/ou (ii) dépôts blanchâtre pouvant être décollés n'importe où dans la cavité oro-pharyngée                                                                                                             | (i) Aspect clinique caractéristique, et (ii) filament micéliens à l'examen direct d'un prélèvement oropharyngé                                                                                                                                                                                                                                                                                 |
| <b>Candidose oesophagienne</b>               | (i) douleurs rétrosternales franches à la déglutition, (ii) critères de candidose buccale "possible" ou "certaine", et (iii) évolution favorable sous traitement antifongique adapté                                                                                                                   | Aspect macroscopique caractéristique de plaques blanches en endoscopie oesophagienne                                                                                                                                                                                                                                                                                                           |
| <b>Paludisme</b>                             | Non applicable                                                                                                                                                                                                                                                                                         | (i) Tableau clinique compatible, et (ii) mise en évidence de <i>Plasmodium</i> sp sur frottis sanguin/goutte épaisse                                                                                                                                                                                                                                                                           |
| <b>Bactériémie isolée</b>                    | Non applicable                                                                                                                                                                                                                                                                                         | (i) Signes généraux (fièvre, myalgies, frissons), (ii) absence de signes cliniques ou paracliniques d'infection bactérienne d'un organe particulier, et (iii) isolement d'une bactérie pathogène sur une ou plusieurs hémocultures                                                                                                                                                             |
| <b>Fièvre aiguë inexpliquée</b>              | Fièvre $\geq 38^{\circ}\text{C}$ durant $< 30$ jours d'étiologie non expliquée <sup>(1)</sup> et séparée de plus de 30 jours de tout autre épisode fébrile                                                                                                                                             | Non applicable                                                                                                                                                                                                                                                                                                                                                                                 |
| <b>Fièvre prolongée inexpliquée</b>          | Fièvre $\geq 37,5^{\circ}\text{C}$ durant $\geq 30$ jours, d'étiologie non expliquée <sup>(1)</sup>                                                                                                                                                                                                    | Non applicable                                                                                                                                                                                                                                                                                                                                                                                 |
| <b>Toxoplasmose cérébrale</b>                | (i) Troubles de la conscience ou signes de localisation neurologique d'apparition récente, (ii) image scanographique de lésion cérébrale avec effet de masse ou avec prise de contraste, et (iii) guérison clinique et scanographique sous traitement antitoxoplasmique                                | Non applicable                                                                                                                                                                                                                                                                                                                                                                                 |
| <b>Atteinte neuroméningée non spécifique</b> | (i) Signes neurologiques centraux (troubles de la conscience ou du comportement avec ou sans signes de localisation), (ii) absence de critères possible ou certains de toxoplasmose, cryptococcose, tuberculose, paludisme, ou méningite bactérienne, et (iii) décès avant la régression de ce tableau | Non applicable                                                                                                                                                                                                                                                                                                                                                                                 |
| <b>Sarcome de Kaposi</b>                     | Aspect cutané ou muqueux caractéristiques                                                                                                                                                                                                                                                              | Preuve histologique                                                                                                                                                                                                                                                                                                                                                                            |



| Diagnostic <sup>(1)</sup>                      | Possible                                                                                                                                                                                                                 | Certain                                                                                                                                                                                                                                   |
|------------------------------------------------|--------------------------------------------------------------------------------------------------------------------------------------------------------------------------------------------------------------------------|-------------------------------------------------------------------------------------------------------------------------------------------------------------------------------------------------------------------------------------------|
| <b>Retinite à CMV</b>                          | Aspect (et évolution) caractéristique aux fonds d'œil répétés                                                                                                                                                            | <b>Non applicable</b>                                                                                                                                                                                                                     |
| <b>Lymphome</b>                                | <b>Non applicable</b>                                                                                                                                                                                                    | Preuve histologique                                                                                                                                                                                                                       |
| <b>Infection viscérale herpétique ou à CMV</b> | Aspects d'ulcérations oesophagiennes chroniques franches en fibroscopie, avec anatomopathologie non spécifique ou non faite, et ne disparaissant pas sous traitement par fluconazole ou sous traitement antituberculeux. | Preuve histologique                                                                                                                                                                                                                       |
| <b>Urétrite bactérienne</b>                    | <b>Non applicable</b>                                                                                                                                                                                                    | (i) Clinique caractéristique et (ii) diplocoques gram+ à l'examen direct, et/ou <i>Neisseria gonorrhoeae</i> identifié en culture, et/ou l'antigène chlamydiae réalisé sur le prélèvement positif.                                        |
| <b>Urétrite parasitaire</b>                    | <b>Non applicable</b>                                                                                                                                                                                                    | (i) Clinique caractéristique et (ii) <i>Trichomonas vaginalis</i> à l'examen direct d'un prélèvement urétral (ou d'un ECBU)                                                                                                               |
| <b>Urétrite non spécifique</b>                 | (i) Ecoulement urétral et/ou brûlure urétrales chez un homme, et (ii) absence de critères d'urétrite bactérienne ou parasitaire                                                                                          | <b>Non applicable</b>                                                                                                                                                                                                                     |
| <b>Leucorrhées bactérienne</b>                 | <b>Non applicable</b>                                                                                                                                                                                                    | (i) Clinique caractéristique et (ii) diplocoques gram+ à l'examen direct, et/ou <i>Neisseria gonorrhoeae</i> identifié en culture, et/ou l'antigène chlamydiae réalisé sur le prélèvement positif, et/ou critères de vaginose bactérienne |
| <b>Leucorrhées parasitaire</b>                 | <b>Non applicable</b>                                                                                                                                                                                                    | (i) Clinique caractéristique et (ii) <i>Trichomonas vaginalis</i> à l'examen direct d'un prélèvement vaginal (ou d'un ECBU)                                                                                                               |
| <b>Leucorrhées non spécifique</b>              | (i) Leucorrhées pathologiques, (ii) absence de critères de "candidose vaginale" "possible" ou "certaine", et (iii) absence de critères de "leucorrhées bactériennes" ou "parasitaires"                                   | <b>Non applicable</b>                                                                                                                                                                                                                     |

<sup>(1)</sup> Pour les diagnostics non listés ici, se référer aux définitions du document « *WHO case definitions of HIV for surveillance and revised clinical staging and immunological classification of HIV-related disease in adults and children. 2006 revision*; <http://www.who.int/hiv/pub/guidelines/hivstaging/en/index.htm>, annexe 1 ; pages 18-27.

<sup>(2)</sup> L'étiologie « non expliquée » implique l'absence de critère pour définir tout autre diagnostic de ce tableau.

\* ces définitions sont susceptibles de faire l'objet de compléments et d'amendements avant le début de l'essai.

# Benefits and risks of early antiretroviral therapy in HIV-infected adults in Abidjan, Côte d'Ivoire:

## Randomized controlled trial (ANRS 12136 "Temprano")

### *PROTOCOL FOR A PHASE III CLINICAL TRIAL*

Version 7.0 August 1, 2013

Approved by the Côte d'Ivoire Minister of Health and Public Hygiene and the Côte d'Ivoire National Ethics Committee for Life Sciences and Health

NLM Identifier (<http://clinicaltrials.gov/>): NCT00495651

#### Sponsor:

#### **National Agency for Research on AIDS and viral hepatitis (ANRS)**

**Director: Jean-François Delfraissy**

101 rue de Tolbiac  
75013 PARIS  
France  
Tel: +331-53-94-60-00  
Fax: +331-53-94-60-01  
Email: [jf.delfraissy@anrs.fr](mailto:jf.delfraissy@anrs.fr)

#### Principal investigators:

#### **Serge Eholie, MD, MSc**

Service des Maladies Infectieuses et Tropicales  
Centre Hospitalier Universitaire (CHU) de Treichville  
BPV3 Abidjan  
Côte d'Ivoire  
Tel: +225-05-65-51-04  
Fax: +335-57-57-45-28  
Email: [speholie@afnet.net](mailto:speholie@afnet.net)

#### **Xavier Anglaret, MD, PhD**

INSERM U897  
Université Victor Segalen Bordeaux 2  
146 rue Léo Saignat  
33076 Bordeaux Cedex  
France  
Tel: +335-57-57-12-58  
Fax: +335-57-57-45-28  
Email: [xavier.Anglaret@isped.u-bordeaux2.fr](mailto:xavier.Anglaret@isped.u-bordeaux2.fr)

**Trial coordination center in Abidjan, Côte d'Ivoire****Programme PAC-CI****18 BP 1954****Abidjan 18****Côte d'Ivoire****Tel: +225-21-75-59-60****Fax: +225-21-24-90-69**Trial Coordinators**Christine Danel, MD, PhD**

Tel: +225-21-75-59-63

Email: [christine.danel@pacci.ci](mailto:christine.danel@pacci.ci)**Raoul Moh, MD, MPH**

Tel: +225-07-82-83-79

Email: [raoul.moh@pacci.ci](mailto:raoul.moh@pacci.ci)Trial monitors**Anani Badje, MD**

Tel: +225-08-12-12-77

Email: [anani.badje@pacci.ci](mailto:anani.badje@pacci.ci)**Jean-Baptiste N'takpe, MD**

Tel: +225-07-57-30-23

Email: [jb.ntakpe@pacci.ci](mailto:jb.ntakpe@pacci.ci)Clinical Research Assistant**Antoine Kouamé**

Tel: +225-08-08-79-42

Email: [antoine.kouame@pacci.civ](mailto:antoine.kouame@pacci.civ)Data Manager**Franck Bohoussou, MSc**Email: [franck.bohoussou@pacci.ci](mailto:franck.bohoussou@pacci.ci)Pharmacist**Romuald Konan, MSc**

Tel: +225-07-20-37-53

Email: [romuald.konan@pacci.ci](mailto:romuald.konan@pacci.ci)**Trial coordination center in Bordeaux, France****INSERM U897****146 rue Léo Saignat, Case No. 11****33076 Bordeaux Cedex****France****Tel: +335-57-57-17-67****Fax: +335-57-57-45-28**Statistician**Delphine Gabillard, MSc**

Tel: +335-57-57-45-17

Email: [delphine.gabillard@isped.u-bordeaux2.fr](mailto:delphine.gabillard@isped.u-bordeaux2.fr)Trial monitor**Jérôme Le Carrou, PhD**

Tel: +335-57-57-17-65

Email: [jerome.lecarrou@isped.u-bordeaux2.fr](mailto:jerome.lecarrou@isped.u-bordeaux2.fr)

Methodologist  
**Valerie Journot, MD, PhD**  
Tel: +335-57-57-10-58  
Email: [valerie.journot@isped.u-bordeaux2.fr](mailto:valerie.journot@isped.u-bordeaux2.fr)

### **Study centers in Abidjan, Côte d'Ivoire**

#### **Centre de Prise en Charge et de Formation (CePReF)**

**Amani Anzian, MD**  
23 BP 2485 Abidjan 23  
Abidjan, Côte d'Ivoire  
Tel: +225-07-20-37-95  
Email: [amanzian@yahoo.fr](mailto:amanzian@yahoo.fr)

#### **Centre Intégré de Recherches Biocliniques d'Abidjan (CIRBA)**

**Henri Chenal, MD**  
18 BP 2071 Abidjan 18  
Abidjan, Côte d'Ivoire  
Tel: +225-07-69-84-58  
Email: [chenal@aviso.ci](mailto:chenal@aviso.ci)

#### **Unité de Soins et de Conseil Ambulatoires (USAC)**

**Serge-Olivier Koulé, MD**  
BP V 3 – CHU de Treichville  
Abidjan, Côte d'Ivoire  
Tel: +225-21-25-94-13  
Email: [kooleyso@yahoo.fr](mailto:kooleyso@yahoo.fr)

#### **Centre de suivi des donneurs de sang, Centre National de Transfusion Sanguine (CNTS)**

**Albert Minga, MD, MPH**  
18 BP 1954 Abidjan 18  
Abidjan, Côte d'Ivoire  
Tel: +225-07-08-76-61  
Email: [albert.minga@pacci.ci](mailto:albert.minga@pacci.ci)

#### **Service des Maladies Infectieuses et Tropicales (SMIT)**

**Emmanuel Bissagnene, MD**  
CHU de Treichville  
BPV3 Abidjan, Côte d'Ivoire  
Tel: +225-07-73-17-23  
Email: [bissagnene@yahoo.fr](mailto:bissagnene@yahoo.fr)

#### **Centre de prise en charge des personnes vivants avec le VIH La Pierre Angulaire (LPA)**

**Madeleine Sassan Morokro, MD**  
06 BP 6064 Abidjan 06  
Abidjan, Côte d'Ivoire  
Tel: +225-21-35-09-68  
Email: [sassan@aviso.ci](mailto:sassan@aviso.ci)

#### **Hôpital Général Félix Houphouet Boigny (HGA)**

**Emmanuel Kouamé, MD**  
14 BP 125 Abidjan 14  
Abidjan, Côte d'Ivoire  
Tel: +225-07-07-31-64  
Email: [kenkouamen@yahoo.fr](mailto:kenkouamen@yahoo.fr)

#### **Formation Sanitaire Anonkoua Kouté (AK)**

**Makaila Oweyole, MD**

13 BP 972 Abidjan 13  
Abidjan, Côte d'Ivoire  
Tel: +225-01-51-06-03  
Email: [omakaila@yahoo.fr](mailto:omakaila@yahoo.fr)

**Centre médico-social El Rapha (ER)**

**Babatounde Nathaniel, MD**  
13 BP 3199 Abidjan 13, Côte d'Ivoire  
Tel: +225-01-80-04-73  
e-mail : [nath\\_tunde@yahoo.fr](mailto:nath_tunde@yahoo.fr)

**Laboratory in Abidjan, Côte d'Ivoire**

**CeDRoS**  
**CHU de Treichville**  
**BPV3 Abidjan**  
**Côte d'Ivoire**  
**Tel: +225-21-25-84-59**  
**Fax: +225-21-24-92-06**

Director  
**Hervé Menan, PharmD, PhD**  
Tel: +225-07-00-07-45  
Email: [vmenan@yahoo.fr](mailto:vmenan@yahoo.fr)

Bacteriologist  
**Timothée Ouassa, PharmD**  
Tel: +225-05-07-75-02  
Email: [timouassa@yahoo.fr](mailto:timouassa@yahoo.fr)

Immunologist  
**André Inwoley, PharmD, PhD**  
Tel: +225-05-05-85-87  
Email: [ikandre@yahoo.fr](mailto:ikandre@yahoo.fr)

Molecular Biologist  
**Thomas d'Aquin Toni, PhD**  
Tel : +225-05-89-8-49  
e-mail : [ta\\_toni@yahoo.com](mailto:ta_toni@yahoo.com)

**Mycobacteriology reference laboratory in Abidjan, Cote d'Ivoire**

**Mireille Dosso, PhD**  
Institut Pasteur Côte d'Ivoire  
01 BP 490 Abidjan 01  
Abidjan, Côte d'Ivoire  
Tel: +225-22-48-53-63  
Email: [mireilledosso@yahoo.fr](mailto:mireilledosso@yahoo.fr)

**Virology reference laboratory in Paris, France**

**Christine Rouzioux, PhD**  
Laboratoire de virologie  
CHU de Necker  
149, rue de Sèvres  
75730 Paris Cedex 15, France  
Tel: +331-44-49-40-00  
Email: [christine.rouzioux@nck.aphp.fr](mailto:christine.rouzioux@nck.aphp.fr)

## List of versions and amendments

This document contains the revised version 7.0 of the Temprano trial protocol.

Recruitment in the Temprano trial started on March 11, 2008 with version 3.0 of the protocol. In version 3.0, patients were eligible for enrolment if they had 250-350 CD4 counts/mm<sup>3</sup> and were at World Health Organization (WHO) clinical stage 1, or had 351-500/mm<sup>3</sup> and were at clinical WHO stage 1, 2 or 3. The regimens for first-line ART were TDF-FTC-EFV, TDF-FTC-ZDV or TDF-FTC-LPV/r. Participants were randomized to start ART immediately ('Early ART') or according to the 2006 WHO criteria for starting ART ('WHO ART').

From March 2008 onwards, the Temprano trial protocol has been amended 4 times (see table 1 below):

- The first amendment, dated 30 March 2009, introduced two modifications: (i) TDF-FTC-ZDV was removed from the list of first-line ART options, due to frequent upper digestive tract side effects with this regimen (*ref.* Ouattara JIAS 2013); (ii) the upper limit of CD4 count eligibility criteria was raised 500 to 600 CD4/mm<sup>3</sup>;

This amendment N°1 transformed Version 3.0 of the protocol to Version 4.0

- The second amendment, dated 15 November 2009, was consecutive to the 'rapid advice' document released by WHO in November 2009 to introduce WHO 2010 guidelines revision. The amendment introduced 3 modifications: (i) patients became eligible for enrolment if they had 350-800 CD4/mm<sup>3</sup> and were at WHO clinical stage <3; (ii) The threshold for starting ART in asymptomatic patients in the WHO ART arms was raised from 200/mm<sup>3</sup> to 350/mm<sup>3</sup>

This amendment N°2 transformed Version 4.0 of the protocol to Version 5.0

- The third amendment, dated 30 November 2012, was consecutive to the 'Guidance on couples HIV testing and counselling' document released by WHO in April 2012. The amendment introduced one modification: the eligibility criteria for starting ART in the WHO ART arms included a stable partnership with an HIV negative individual. detailed analysis plan was detailed the way the influence of baseline CD4 count on the efficacy of the two interventions would be explored;

This amendment N°3 transformed Version 5.0 of the protocol to Version 6.0

- The fourth amendment, dated 30 July 2013, was consecutive to the 'Consolidated guidelines on the use of antiretroviral drugs for treating and preventing HIV infection' released by WHO in June 2013. The amendment introduced one modification: The threshold for starting ART in asymptomatic patients in the WHO ART arms was raised from 350/mm<sup>3</sup> to 500/mm<sup>3</sup>.

This amendment N°4 transformed Version 6.0 of the protocol to Version 7.0 (current version).

## Evolution of inclusion criteria, criteria for starting ART, and first-line ART regimen in Temprano

| Amendment       | Protocol Version | Date                            | Inclusion criteria                                                                                                                    | Criteria for starting ART in arms 1 and 2 ("WHO-ART" arms)                                                                                                     | First line ART regimen                                                                                                                                    |
|-----------------|------------------|---------------------------------|---------------------------------------------------------------------------------------------------------------------------------------|----------------------------------------------------------------------------------------------------------------------------------------------------------------|-----------------------------------------------------------------------------------------------------------------------------------------------------------|
| Initial version | 3.0              | 03/11/2008<br>(first inclusion) | CD4 counts 250-350/mm <sup>3</sup> AND WHO clinical stage 1 OR<br>CD4 counts 350-500/mm <sup>3</sup> AND WHO clinical stage 1, 2 or 3 | <b>WHO 2006 criteria</b> :<br>CD4 count <200/mm <sup>3</sup> OR<br>CD4 counts 250-350/mm <sup>3</sup> and WHO clinical stage 2 or 3 OR<br>WHO clinical stage 4 | HIV-1 infected men or women with effective contraception and no history of pMTCT with NVP : TDF-FTC-EFV<br>Other patients : TDF-FTC-ZDV OR TDF-FTC-LPV/r. |
| N°1             | 4.0              | 03/30/2009                      | CD4 counts 250-350/mm <sup>3</sup> AND WHO clinical stage 1<br>OR CD4 counts 350-600/mm <sup>3</sup> AND WHO clinical stage 1, 2 or 3 | No change                                                                                                                                                      | HIV-1 infected men or women with effective contraception and no history of pMTCT with NVP : TDF-FTC-EFV<br>Other patients : <b>TDF-FTC-LPV/r</b>          |
| N°2             | 5.0              | 11/15/2009                      | CD4 counts <b>400-800/mm<sup>3</sup></b> AND WHO clinical stage <b>1 or 2</b>                                                         | <b>WHO 2010 criteria</b><br>CD4 count < <b>350/mm<sup>3</sup></b> OR<br>WHO clinical stage <b>3 or 4</b>                                                       | No change                                                                                                                                                 |
| N°3             | 6.0              | 11/30/2012                      | No change                                                                                                                             | <b>WHO 2010 criteria</b><br>CD4 count <350/mm <sup>3</sup> OR<br>WHO clinical stage 3 or 4 OR<br><b>Stable partnership with HIV-negative individual</b>        | No change                                                                                                                                                 |
| N°4             | 7.0              | 07/30/2013                      | No change                                                                                                                             | <b>WHO 2013 criteria</b><br>CD4 count < <b>500/mm<sup>3</sup></b> OR<br>WHO clinical stage 3 or 4 OR<br>Stable partnership with HIV-negative individual        | No change                                                                                                                                                 |

## Synopsis

**Design:** Multicenter randomized 2 x 2 factorial superiority trial.

**Settings:** Nine care centers in Abidjan, Côte d'Ivoire.

**Objective:** To assess the efficacy of two interventions in reducing severe morbidity in HIV-infected adults with CD4 counts  $<800\text{mm}^3$  and no criteria for starting ART according to the most recent WHO guidelines. The two interventions are:

- Starting ART immediately, compared to deferring ART initiation until WHO criteria are met \*;
- Receiving a 6-month isoniazid preventive therapy (IPT), compared to not receiving IPT.

**Inclusion criteria:** (i) HIV-1 or HIV-1+2 infection; (ii) age  $\geq 18$  years; (iii) CD4 count  $<800/\text{mm}^3$  and no criteria for starting ART according to the most recent WHO guidelines; and (iv) no active tuberculosis.

**Non-Inclusion criteria:** History of combined ART; Pregnancy; Breastfeeding; HIV-2 infection alone; Ongoing serious clinical signs or symptoms leading to suspect active tuberculosis or any other disease that would lead to recommend to start ART; severe renal, cardiac or hepatic disease.

**Trial arms:** Participants will be randomized into 4 arms:

- Arm 1 (**WHO ART**): ART initiation according to WHO criteria (WHOART), at any time during follow-up, as soon as current WHO criteria are met;
- Arm 2 (**WHO ART+IPT**): IPT (300 mg/day) for six months and ART initiation according to WHO criteria;
- Arm 3 (**Early ART**): immediate ART initiation;
- Arm 4 (**Early ART+IPT**): IPT (300 mg/day) for six months and immediate ART initiation;

\* IPT will be started after a month of follow-up in the trial ( M1 visit) and lasts until 7 months of follow-up (M7 visit)

### First-line ART regimen:

- 1 Preferably (no contraindication to efavirenz): tenofovir/emtricitabine + efavirenz
- 2 Alternatively (HIV-1+2-dually infected patients, women who do not use effective contraception or who have a history of nevirapine monotherapy for pMTCT: tenofovir/emtricitabine + lopinavir/ritonavir, or tenofovir/emtricitabine+zidovudine ; the latter regimen was abandoned in March 2009 due to increased upper digestive side effects

**Follow up:** All participants will be followed at least 30 months. Patients who reach 30 months of follow up will continue to be followed-up until the last participant reaches 30 months.

**Primary endpoint:** The primary endpoint of the Temprano trial will be “severe HIV infectious and tumoral diseases”, a combination of:

- All-cause deaths,
- AIDS-defining diseases,
- Non-AIDS-defining malignancies, and
- Non-AIDS-defining invasive bacterial diseases.

“Invasive bacterial diseases” include:

- Infections with bacteremia, and
- Bacterial infections of solid organ or aseptic cavities (pneumonia, pleurisy, meningitis, pyomyositis/necrotizing fasciitis, pyelonephritis, prostatitis, orchitis, epididymitis, salpingitis, endocarditis, myocarditis, cholecystitis, arthritis, osteomyelitis, visceral abscess).



Otitis, sinus infections, and bacterial enteritis will not be considered invasive bacterial infections unless they are associated with a positive blood culture.

**Secondary endpoint:**

- Clinical secondary endpoint: All morbidity event graded 3-4 according to the ANRS SAE grading table that do not fulfill the criteria for being included in the primary endpoint (see above) will be combined within the “other grade 3-4 morbidity” group, even if they are not associated with drug toxicity.
- Others: Adherence to treatment, virological suppression and antiretroviral resistance, individual socioeconomic indicators, quality of life, cost- effectiveness.

**Sample size:** 2076 patients (519 in each arm).

**Primary analysis:**

The primary analysis will be intent to treat. The two IPT arms (arm II and IV) will be compared to the two no-IPT arms “(arm I and III), and the two early ART arms (arm III and IV) to the two WHO ART arms “(arm I and II). Time-dependent analyses will compare the risk of primary outcome at 30 months between strategies, adjusting for the other strategy and for the trial center. Interaction between strategies will be tested. The hypothesis of proportionality of risk will be verified.

Ancillary analyses will be performed to explore: (i) the influence of baseline CD4 count on the efficacy of the two interventions; (ii) the robustness of the results when varying the definition of the endpoints

## ANRS 12136 Temprano Trial

### Information sheet for participants

Dear Sir or Madam,

The physician and social worker with whom you are about to speak will invite you to participate in a research study entitled "The benefits and risks of early antiretroviral therapy and six-month isoniazid prophylaxis in HIV-infected adults in Abidjan, Côte d'Ivoire."

This study is financed by the French National Agency for Research on AIDS and viral hepatitis (ANRS), as part of a collaboration between the ANRS and the Côte d'Ivoire Ministry of Health. The goal of this collaboration is to conduct clinical research aimed at improving treatment for people living with HIV. It was founded in 1993 and since then has completed several important studies, namely Cotrimo-CI, Ditrane, and Trivacan. We plan to enroll 1,642 volunteers in the current study.

#### **What are "HIV infection" and "AIDS"?**

The HIV virus causes a disease called AIDS. This virus is very common in Abidjan: about one in twenty adults are currently infected.

When a person carries the virus, the body's defenses against infections (also known as the immune system) gradually disappear. At first, HIV-infected people generally do not notice any changes. After a few years the immune system weakens and the HIV-infected people get sick more and more often, because they cannot defend themselves against diseases. The first diseases HIV-infected people are at risk of catching are common diseases such as tuberculosis, pneumonia, etc. Later, when the immune system has almost completely disappeared, HIV-infected people get infected with rarer diseases that are more severe and more difficult to treat. This is when we say they have AIDS.

#### **What treatments are available for HIV?**

Currently, no drug can completely cure HIV infection. Once you become infected with the HIV virus, it remains in your body for the rest of your life.

**Antiretroviral** drugs are powerful drugs that attack the virus without destroying it altogether. These drugs keep the body's immune system strong enough to prevent new diseases from occurring, thus ensuring that HIV-infected patients never get AIDS. Antiretroviral drugs are very effective.

#### **What are the disadvantages of antiretroviral drugs?**

Like all effective drugs, antiretroviral drugs have some disadvantages. First, some drugs may have unpleasant side effects (or **adverse effects**). A doctor must monitor people who take these drugs on a regular basis, in order to detect adverse effects and switch drugs if these adverse effects are severe.

Second, antiretroviral drugs must be taken very regularly, to prevent the virus from becoming resistant to the drugs. When patients do not take their drugs regularly, or when they do not take all of the drugs that have been prescribed, the virus can become resistant to these drugs and the treatment may stop working. When you start antiretroviral therapy, therefore, you must understand that it is very important to continue the treatment for the rest of your life, without missing a single dose.

Third, it appears that antiretroviral drugs do not completely eliminate the risk of catching certain diseases, particularly **tuberculosis**. Tuberculosis remains fairly common among patients who start antiretroviral therapy, especially in the first year of treatment and among patients who started treatment when their immune system was very weak.

### **What questions may arise regarding antiretroviral therapy?**

Now that antiretroviral drugs are available in Côte d'Ivoire and that we know they work well, two important questions arise.

The first question is: **When should HIV-infected patients start taking antiretroviral drugs?** The current national guidelines recommend starting antiretroviral therapy when the immune system is at an "intermediary" level, right before getting AIDS. However, some physicians wonder whether patients should begin treatment a few months or a few years earlier, in part to avoid the risk of acquiring tuberculosis in the first months of treatment.

The second question is: **Should HIV-infected patients take anti-tuberculosis medications for six months right before starting antiretroviral therapy (or at the beginning of antiretroviral therapy), to reduce the risk of acquiring tuberculosis later on?** This intervention is called ***anti-tuberculosis prophylaxis***. It is not currently recommended in Côte d'Ivoire.

The research study in which we invite you to participate aims to answer these two questions. The goal of the study is to determine whether the suggested interventions (very early initiation of antiretroviral therapy and anti-tuberculosis prophylaxis) are effective and whether they have any disadvantages. Based on our results, we will know whether or not these interventions should be recommended in Côte d'Ivoire.

### **How will the study be carried out?**

You have been invited to participate in the study today because you have not yet reached the criteria set by the Ministry of Health for starting antiretroviral therapy. However, you will likely reach those criteria in a few months or years.

If you agree to participate, here is what will happen. First, you will be randomly assigned to one of the following four strategies:

- Start antiretroviral therapy immediately (without waiting to reach the Ministry of Health criteria) and take anti-tuberculosis prophylaxis for six months.
- Start antiretroviral therapy immediately (without waiting to reach the Ministry of Health criteria), but do not take any anti-tuberculosis prophylaxis.
- Take anti-tuberculosis prophylaxis for six months, but do not start antiretroviral therapy immediately. You will start antiretroviral therapy once you reach the Ministry of Health criteria, according to your clinical and laboratory exam results. This may occur at any time during your follow-up.
- Do not take anti-tuberculosis prophylaxis for six months and do not start antiretroviral therapy immediately. You will start antiretroviral therapy once you reach the Ministry of Health criteria, according to your clinical and laboratory exam results. This may occur at any time during your follow-up.

Regardless of the strategy to which you are assigned, you have to do the following for 30 months:

- Attend follow-up consultations (once a month for the first three months and once every three months thereafter)
- Accept a blood draw (once every six months)
- Attend the clinic at which you are being followed every time you get sick.
- Take your prescribed medications.

This research study does not require more clinic visits or blood samples than usual medical care. Throughout your participation in the study, you will receive antiretroviral drugs and any other medications to treat HIV-related diseases free of charge. Likewise, the study will cover laboratory exams and x-rays, as well as hospitalizations, if necessary.

Some of the blood samples will be stored for future analysis. These frozen samples will allow us to verify data, perform more sensitive tests and conduct laboratory research (including genetic research), if needed. Such research could help us to better understand the evolution of HIV disease and/or to improve HIV treatment.

Each time you visit the study center for routine visits or because you are sick, we will reimburse you with a fixed amount of money. If the study is not over when you reach 30 months of follow-up, we will ask you to continue to participate in the study under the same conditions for a longer period of time. If this situation arises, we will tell you the exact date on which the study will end and we will ask you to formally consent to extending your follow-up.

### **What are the advantages and disadvantages of participating?**

The follow-up offered in this study is intended to improve your health. You will not receive any compensation, but neither will you incur any additional costs. It is currently unclear whether starting antiretroviral therapy early and taking anti-tuberculosis prophylaxis before or at initiation of antiretroviral therapy is better or worse than starting antiretroviral therapy later and not taking any anti-tuberculosis prophylaxis (i.e., the treatment you would receive if you were not a participant in our study).

The main advantage of starting antiretroviral therapy earlier and taking anti-tuberculosis prophylaxis is a reduction in the risk of developing diseases, particularly tuberculosis. A potential disadvantage is an increase in drug-related adverse events.

Until the end of the study, therefore, we will be unable to tell you whether your assigned strategy is more/less effective or leads to more/fewer adverse events than if you had not participated in the study. The only thing we can say is that by participating in this study:

- You will help answer these important questions, which will be extremely useful to all HIV-infected people in Africa.
- You will receive regular care and treatment from the study team, which will carry out the research study for at least 30 months. We will provide you with the best possible conditions, in order to obtain the highest efficacy and to avoid as many adverse effects as possible.

### **Time for reflection and volunteering**

We advise you to think carefully before deciding to accept or reject our invitation to participate in this study. **We remind you that if you choose to participate in the study, you may be assigned to starting antiretroviral therapy right away. If you are not ready to start taking medication seriously and regularly, we recommend that you not accept to participate.**

You can now ask the doctor or the social worker who gave you this information sheet and told you about the research study any additional questions. Next, take the time to think about our invitation. We will set up an appointment in one to two weeks for you to tell us your decision. When you return to give us your answer, you will be completely free to accept or to reject our invitation to participate in the study.

Refusing to participate will not affect your relationship with your doctor or the care you receive. If you accept, you will be asked to sign the "informed consent form." You will start participating in the study on that same day.

Once you have enrolled in the study, you will be informed of any modifications we make to the study. It is very unlikely that we will make any modifications, but if we do at any time, most likely for scientific reasons, you will be informed in advance and you will be able to choose whether or not to remain enrolled in the trial. If you accept to participate in the study, you will have the right to change your mind without providing any reason. This decision will not affect your relationship with your doctor. This means that if you stop participating in the trial, you will be able to continue receiving the same care as patients who remain in the study.

**What will happen at the end of study?**

At the end of the study, you will continue to receive medical care and antiretroviral therapy at from the same doctors at the same clinic. Your care will follow the Ministry of Health guidelines. Six months before the end of the study, we will notify you of the treatment guidelines in effect at that time. Antiretroviral drugs are currently free (Order of the Côte d'Ivoire Ministry of Health and Public Hygiene, 20 August, 2008), regardless of the regimen, as long as they are included in the nationally approved list of drugs. Patients are also entitled to laboratory tests, including CD4 count tests. At the end of the study, you will also be invited to attend one or more briefings on the results of the study, so that you can learn the answers to the questions this study evaluates and that your participation will have helped to answer.

**Confidentiality, use of results, and legal measures**

The ANRS, the funder of the study, has taken out insurance in accordance with the law. This study was approved by Côte d'Ivoire National Ethics Committee for Life Sciences and Health and the Minister of Health and Public Hygiene. It has also been approved by the National HIV Care Program and the National Tuberculosis Program.

All of your data – questionnaires completed by the physicians and social workers at each of your visits, as well as the results of your blood tests – will remain confidential. Only the medical team in charge of the research study will be able to analyze them. Your data will be computerized and “de-identified.” In other words, your name will not appear in any of the study’s hard-copy documents or digital databases. Each patient will be assigned a unique anonymous personal identifier (study center code + number). Data will be analyzed in France and Côte d'Ivoire.

You can ask your doctor for the information in your medical record at any time, including the data collected for this study. If any of the information in your medical record is inaccurate, you may request for it to be rectified.

## ANRS 12136 Temprano Trial

### Consent form

I, Mr. or Ms.

Certify that:

The undersigned physician has invited me to participate in this study, in accordance with the information provided in the information sheet.

- I read the information sheet and understood it
- The information sheet was read to me and I understood it
- The information sheet was translated for me and I understood it

I discussed the information sheet with the doctor and s/he explained the advantages and disadvantages of this study.

In particular, I understand that I am free to accept or reject the invitation to participate. If I accept to participate, I am free to withdraw while continuing to receive the same care and treatment as before.

I agree to participate in this study.

I authorize the study researchers who are bound by patient-doctor confidentiality to consult and analyze the confidential data pertaining to my case.

I authorize the study researchers to freeze and store a portion of the plasma and cells from my blood samples for future analyses.

Date:

Abidjan,

Signature:

I, Dr. \_\_\_\_\_ certify that I have explained the terms and conditions of inclusion and follow-up in our research study to the above-named patient. I pledge to uphold the terms and conditions of the information sheet, the individual rights and liberties of the patient, and the requirements of scientific work.

This explanation was provided:

- exclusively in French
- in another language, by myself
- in another language, through a translator

Date:

Signature:

## TABLE OF CONTENTS

|          |                                                                    |           |
|----------|--------------------------------------------------------------------|-----------|
| <b>1</b> | <b>JUSTIFICATION.....</b>                                          | <b>17</b> |
| 1.1      | <i>BACKGROUND</i> .....                                            | 17        |
| 1.1.1    | <i>HIV-related tuberculosis in sub-Saharan Africa</i> .....        | 17        |
| 1.1.2    | <i>Anti-tuberculosis chemoprophylaxis</i> .....                    | 17        |
| 1.1.3    | <i>ART initiation in sub-Saharan Africa</i> .....                  | 18        |
| 1.2      | TRIAL ASSUMPTIONS.....                                             | 18        |
| 1.3      | TRIAL STRATEGIES .....                                             | 19        |
| <b>2</b> | <b>OBJECTIVES.....</b>                                             | <b>19</b> |
| 2.1      | MAIN OBJECTIVE .....                                               | 19        |
| 2.2      | SECONDARY OBJECTIVES .....                                         | 19        |
| <b>3</b> | <b>DESIGN AND TIMELINE.....</b>                                    | <b>19</b> |
| 3.1      | DESIGN .....                                                       | 19        |
| 1.1      | TIMELINE.....                                                      | 19        |
| <b>4</b> | <b>SETTINGS.....</b>                                               | <b>20</b> |
| 4.1      | STUDY CENTERS .....                                                | 20        |
| 4.2      | LABORATORIES .....                                                 | 20        |
| 4.3      | PATIENT CARE.....                                                  | 20        |
| <b>5</b> | <b>ELIGIBILITY .....</b>                                           | <b>21</b> |
| 5.1      | INCLUSION CRITERIA .....                                           | 21        |
| 5.2      | EXCLUSION CRITERIA .....                                           | 21        |
| <b>6</b> | <b>INTERVENTIONS .....</b>                                         | <b>21</b> |
| <b>7</b> | <b>TRIAL ENDPOINTS .....</b>                                       | <b>22</b> |
| 7.1      | PRIMARY ENDPOINT .....                                             | 22        |
| 7.2      | SECONDARY ENDPOINTS .....                                          | 22        |
| <b>8</b> | <b>TRIAL CONDUCT .....</b>                                         | <b>23</b> |
| 8.1      | PRE-INCLUSION CLINIC VISIT.....                                    | 23        |
| 8.2      | CONSENT, INCLUSION AND RANDOMIZATION .....                         | 23        |
| 8.2.1    | <i>Consent</i> .....                                               | 23        |
| 8.2.2    | <i>Randomization</i> .....                                         | 24        |
| 8.3      | ROUTINE TREATMENT .....                                            | 25        |
| 8.3.1    | <i>Cotrimoxazole prophylaxis</i> .....                             | 25        |
| 8.3.2    | <i>INH prophylaxis</i> .....                                       | 25        |
| 8.3.3    | <i>ART</i> .....                                                   | 25        |
| 8.4      | ROUTINE CLINIC VISITS AND LABORATORY TESTS .....                   | 26        |
| 8.5      | OTHER CLINIC VISITS, ADDITIONAL TESTS AND MEDICATIONS.....         | 28        |
| 8.6      | REPORTING OF MORBIDITY EVENTS .....                                | 28        |
| 8.7      | WITHDRAWAL, DISCONTINUATION OF THE TRIAL ARM, DEVIATIONS .....     | 30        |
| 8.7.1    | <i>Withdrawal of consent and withdrawal from the trial</i> .....   | 30        |
| 8.7.2    | <i>Premature and definitive discontinuation of the trial</i> ..... | 30        |
| 8.7.3    | <i>Loss to follow-up</i> .....                                     | 30        |
| 8.7.4    | <i>Other deviations</i> .....                                      | 30        |

|           |                                                                  |           |
|-----------|------------------------------------------------------------------|-----------|
| 8.7.5     | Consequences.....                                                | 31        |
| <b>9</b>  | <b>SEVERE ADVERSE EVENTS .....</b>                               | <b>31</b> |
| 9.1       | DEFINITION .....                                                 | 31        |
| 9.2       | DECLARATION .....                                                | 32        |
| 9.3       | IMPLICATIONS FOR THE TRIAL DRUGS .....                           | 32        |
| <b>10</b> | <b>PREGNANCIES AND NEWBORNS .....</b>                            | <b>32</b> |
| 10.1      | TREATMENT DURING PREGNANCY AND BREASTFEEDING .....               | 32        |
| 10.2      | DECLARATION .....                                                | 33        |
| 10.3      | CHILDREN BORN TO MOTHERS PARTICIPATING IN THE TRIAL .....        | 33        |
| <b>11</b> | <b>STATISTICAL ANALYSES .....</b>                                | <b>34</b> |
| 11.1      | SOFTWARE .....                                                   | 34        |
| 11.2      | SAMPLE SIZE.....                                                 | 34        |
| 11.3      | ANALYSIS .....                                                   | 34        |
| 11.3.1    | <i>Study subjects included in the analysis.....</i>              | <i>34</i> |
| 11.3.2    | <i>Baseline and follow-up characteristics .....</i>              | <i>34</i> |
| 11.3.3    | <i>Analysis of primary and clinical secondary endpoints.....</i> | <i>35</i> |
| 11.3.4    | <i>Other endpoints .....</i>                                     | <i>36</i> |
| 11.3.5    | <i>Safety criteria and interim analyses .....</i>                | <i>36</i> |
| <b>12</b> | <b>TRIAL MONITORING .....</b>                                    | <b>36</b> |
| 12.1      | SCIENTIFIC ADVISORY BOARD .....                                  | 36        |
| 12.1.1    | <i>Members.....</i>                                              | <i>36</i> |
| 12.1.2    | <i>Frequency of meetings.....</i>                                | <i>37</i> |
| 12.1.3    | <i>Role .....</i>                                                | <i>37</i> |
| 12.2      | DATA SAFETY MONITORING BOARD.....                                | 37        |
| 12.2.1    | <i>Members.....</i>                                              | <i>37</i> |
| 12.2.2    | <i>Frequency of meetings.....</i>                                | <i>38</i> |
| 12.2.3    | <i>Role .....</i>                                                | <i>38</i> |
| 12.3      | EVENT VALIDATION COMMITTEE.....                                  | 38        |
| 12.3.1    | <i>Members.....</i>                                              | <i>38</i> |
| 12.3.2    | <i>Frequency of meetings.....</i>                                | <i>38</i> |
| 12.3.3    | <i>Role .....</i>                                                | <i>38</i> |
| <b>13</b> | <b>ETHICS AND REGULATIONS.....</b>                               | <b>38</b> |
| 13.1      | ADHERENCE TO RECOMMENDATIONS .....                               | 38        |
| 13.2      | PROTOCOL AMENDMENTS .....                                        | 39        |
| 13.3      | PATIENT CONFIDENTIALITY.....                                     | 39        |
| 13.4      | INSURANCE AND PATIENT CARE.....                                  | 39        |
| 13.5      | FILING AND STORAGE OF DOCUMENTS AT TRIAL COMPLETION.....         | 40        |
| 13.6      | TRIAL REGISTRATION .....                                         | 40        |
| <b>14</b> | <b>MONITORING AND GOOD CLINICAL PRACTICE.....</b>                | <b>40</b> |
| 14.1      | GENERAL ORGANIZATION.....                                        | 40        |
| 14.2      | DATA COLLECTION INSTRUCTIONS .....                               | 40        |
| 14.3      | STUDY CENTER MONITORING.....                                     | 41        |



14.4 AUDIT - INSPECTION .....42

**15 PUBLICATION OF RESULTS .....42**

**16 REFERENCES .....43**

**APPENDIX 1: ANRS SAE GRADING TABLE .....46**

**APPENDIX 2: DIAGNOSTIC CRITERIA .....50**

## 1 JUSTIFICATION

### 1.1 BACKGROUND

#### 1.1.1 HIV-related tuberculosis in sub-Saharan Africa

Tuberculosis has been the leading cause of mortality among HIV-infected adults in sub-Saharan Africa since long before the era of highly active antiretroviral therapy<sup>1</sup>. Tuberculosis infection differs in HIV-infected and HIV-uninfected patients. HIV-tuberculosis in HIV-infected individuals is characterized by:

- 3 A different clinical spectrum, with a higher frequency of extra-pulmonary infections, negative smears, and pulmonary infections with atypical X-rays<sup>2-4</sup>. As a result, the disease is diagnosed and treated later in HIV-infected individuals, thus leading to higher pre-treatment mortality rates<sup>5</sup>.
- 4 Higher mortality rates in patients on treatment for tuberculosis<sup>2,6</sup> and a higher rate of recurrence of active tuberculosis among those who have completed treatment<sup>7</sup>.

Tuberculosis tends to occur early in the natural history of HIV disease and is thus observed at every stage of immunosuppression. Although the incidence of tuberculosis does increase with increased immunosuppression, it has been shown to be twice as high in the first year of HIV infection than in HIV-uninfected people<sup>8</sup>.

The incidence of tuberculosis infection declines when CD4 counts increase as a result of ART<sup>9</sup>. However, active tuberculosis remains the leading cause of severe morbidity in sub-Saharan African adults who have been on ART for up to three years<sup>9,10</sup>. The combination of two major treatments – antiretroviral and anti-tuberculosis – may lead to additional problems, such as increased toxicity<sup>11</sup>. ART initiation among immunocompromised patients with active tuberculosis can lead to immune reconstitution inflammatory syndrome (IRIS), which makes diagnosis and care more difficult, and increases mortality<sup>12</sup>.

#### 1.1.2 Anti-tuberculosis chemoprophylaxis

In the 1990s, a large number of randomized controlled trials, many of them in sub-Saharan Africa, showed that primary chemoprophylaxis against tuberculosis is effective in reducing the incidence of tuberculosis infection among HIV-infected patients who have not yet initiated ART<sup>13,14-19</sup>. Almost all of these trials evaluated a six-month course of isoniazid (INH) monotherapy administered at 300 mg/day. Other trials assessed more complex but shorter regimens: rifampicin (RMP) + INH for three to four months; RMP + INH + pyrazinamide (PZA) for three months; and RMP + PZA for two months. A 1999 meta-analysis showed that the risk of acquiring tuberculosis among patients who received INH chemoprophylaxis for six months was 0.58 (95% confidence interval [CI], 0.39 – 0.87), compared to patients who did not receive any anti-tuberculosis prophylaxis<sup>20</sup>. More complex regimens did not show any additional benefits.

In response to this evidence, in 1999 the WHO recommended that HIV-infected patients follow a six-month course of primary INH prophylaxis<sup>21</sup>. The prerequisites for health facilities to implement this recommendation were: integrated HIV and tuberculosis care, the ability to detect active tuberculosis before initiating prophylaxis, and the assertion that the main priority of national tuberculosis programs was to detect and treat tuberculosis, rather than only prevent it.

Few studies have evaluated the long-term outcomes of secondary INH chemoprophylaxis, that is, after successful completion of anti-tuberculosis treatment. Three African studies, however, have shown that this strategy reduces the incidence of recurrent tuberculosis<sup>22-24</sup>. The WHO does not recommend secondary chemoprophylaxis. Regardless of the WHO recommendations, neither primary nor secondary chemoprophylaxis against tuberculosis is administered in Côte d'Ivoire as well as in many sub-Saharan African countries, for two main reasons:

- 5 Physicians fear that these interventions will lead to the emergence of resistance to anti-tuberculosis treatment among patients who have undiagnosed active tuberculosis. This risk increases with increased duration of prophylaxis and increased immunosuppression, since immunosuppression can hide the symptoms of active tuberculosis or make them less specific<sup>25</sup>.
- 6 The long-term benefits of primary prophylaxis in patients who have not yet initiated ART are unknown, since the risk of tuberculosis infection and recurrence of active tuberculosis increase with increased immunosuppression<sup>26, 27</sup>.

### **1.1.3 ART initiation in sub-Saharan Africa**

From 2006 to 2009, the WHO recommended HIV-infected adults in resource-limited countries to initiate ART when they reached one of the following criteria: (i) WHO clinical stage 4 disease, (ii) CD4 count  $<200/\text{mm}^3$ , or (iii) WHO clinical stage 3 and CD4 count  $200\text{-}350/\text{mm}^3$ <sup>28</sup>. In December 2009, the WHO recommended that patients initiate ART at CD4 counts  $<350/\text{mm}^3$ , regardless of clinical stage<sup>29</sup>. This shift to earlier initiation was based on the results of the CIPRAHT 001 trial in Haiti, which compared ART initiation at CD4 counts  $<350\text{ CD4}/\text{mm}^3$  with ART initiation according to the 2006 WHO criteria<sup>30</sup>.

Two types of arguments can be used to support even earlier ART initiation worldwide, particularly in sub-Saharan Africa:

#### **Individual-level arguments**

- 7 The incidence of non-AIDS-defining HIV-related diseases (non-AIDS-defining malignancies, cardiovascular diseases and renal diseases) is relatively low, but increases mortality even at high CD4 counts<sup>31, 32</sup>. This trend has been shown in collaborative cohorts in high-income countries as well as in the SMART trial. It triggered the "when to start ART" question in high-income countries and is the motivation behind the START trial<sup>33</sup>.
- 8 The incidence of severe infectious diseases (tuberculosis, invasive bacterial diseases, and sometimes malaria) among patients with high CD4 counts who are not on ART is higher in Africa than in Europe<sup>34-36</sup>. This is one of the reasons for which cotrimoxazole prophylaxis is recommended earlier in sub-Saharan Africa than in high-income countries<sup>37</sup>. Tuberculosis and bacterial diseases are curable diseases and are often considered to be HIV-related but not severe in industrialized countries. In sub-Saharan Africa, these diseases are the two main causes of mortality in HIV-infected patients, because access to diagnosis and treatment is lower in this region.

The potential individual benefits of earlier ART initiation with respect to morbidity and mortality must be weighed against the risks of starting therapy "too early," which may lead to increased drug-related adverse events, increased resistance to ART in the long term, and decreased adherence in the long term.

#### **Population-level arguments**

Effective ART reduces the risk of HIV transmission by reducing the concentration of plasma HIV RNA. Earlier ART initiation could have a preventive effect and thus help curb the epidemic<sup>38</sup>. This public health argument is only acceptable if earlier ART does not harm the patients receiving treatment. Therefore, if policy makers decide to initiate ART as early as possible to reduce HIV transmission "collectively," it must first be shown that early ART initiation leads to a favorable risk-benefit ratio at the individual level.

## **1.2 TRIAL ASSUMPTIONS**

Our trial is based on the following assumptions:

- Early ART initiation, that is before reaching the WHO criteria, could significantly reduce the probability of severe HIV-related morbidity or death in the medium term.

- The impact of earlier ART initiation on morbidity and mortality must be adjusted for use of anti-tuberculosis prophylaxis, because tuberculosis and tuberculosis-related deaths are likely to represent a considerable proportion of morbidity and mortality among HIV-infected patients with high CD4 counts in Côte d'Ivoire.

### 1.3 TRIAL STRATEGIES

We will evaluate the effectiveness of initiating ART immediately among HIV-infected adults with CD4 counts  $<800/\text{mm}^3$  who have not yet reached the WHO criteria for initiating ART.

Half of these patients will take 300 mg of INH chemoprophylaxis against tuberculosis for six months, starting one month after study inclusion (M1). Although the Côte d'Ivoire National Tuberculosis Program does not currently recommend prophylaxis against tuberculosis, it has allowed the Temprano trial to assess this strategy among patients with high CD4 counts.

ART regimens will be prescribed according to national and international recommendations.

The main adverse effects related to INH monotherapy are drug-induced hepatitis and lower limb neuropathy. Based on previous tuberculosis chemoprophylaxis research among HIV-infected adults in sub-Saharan Africa<sup>14, 16, 17, 22-24, 26, 27</sup>, we expect few adverse events and a favorable risk-benefit ratio. Resistance to INH in Côte d'Ivoire, including single and multidrug resistance, has remained stable at 6% for several years, according to national surveillance data<sup>39</sup>.

## 2 OBJECTIVES

### 2.1 MAIN OBJECTIVE

Our main objective is, in HIV-infected adults with CD4 counts  $<800/\text{mm}^3$  and no criteria for starting ART according to the most recent WHO guidelines, to assess the efficacy of two interventions:

- Starting ART immediately, compared to deferring ART initiation until WHO criteria are met;
- Receiving a 6-month isoniazid preventive therapy (IPT), compared to not receiving IPT.

*The strategies will be compared with respect to their efficacy in decreasing the risk of severe HIV-related infectious diseases or malignancies (AIDS-defining diseases, non-AIDS-defining malignancies, and invasive bacterial diseases) or death.*

### 2.2 SECONDARY OBJECTIVES

To assess the tolerance of the two strategies.

To assess the feasibility and acceptability of the two strategies.

To look for factors associated with the efficacy of the two strategies.

## 3 DESIGN AND TIMELINE

### 3.1 DESIGN

Open label multicenter randomized 2 x 2 factorial superiority trial, with an equal number of patients in each arm.

#### 1.1 TIMELINE

Patients will be followed for a minimum of 30 months. Study subjects who reach 30 months of follow-up will remain in the trial until the last participant enrolled in the trial reaches 30 months of follow-up.

## 4 SETTINGS

### 4.1 STUDY CENTERS

Study subjects will be enrolled and receive care and treatment at the following 9 clinics in Abidjan, Côte d'Ivoire:

- Centre de prise en charge, de recherche et de formation (CePReF), FSU de Yopougon
- Centre Intégré de Recherche Bioclinique d'Abidjan (CIRBA)
- Service des Maladies Infectieuses et Tropicales (SMIT), Centre Hospitalier Universitaire (CHU) de Treichville
- Unité de Soins Ambulatoires et de Conseil (USAC), CHU de Treichville
- Centre de suivi des donneurs de sang du Centre National de Transfusion Sanguine (CNTS), Abidjan
- Centre de prise en charge des personnes infectées VIH « La Pierre Angulaire », Treichville
- Hôpital Général Félix Houphouët Boigny (HGA), Abobo
- Formation Sanitaire Urbaine d'Anonkoua Kouté, Abobo
- Hopital El Rapha, Abobo.

### 4.2 LABORATORIES

The AIDS diagnostics and research center (CeDReS) at the CHU de Treichville will conduct all laboratory tests for the trial. CeDReS has been the reference laboratory for the ANRS site in Abidjan since 1993. It has the necessary equipment and experienced technicians to:

- Detect mycobacteria by direct examination of sputum (auramine immunofluorescence); sputum cultures (Lowenstein-Jensen medium); rapid automated mycobacteria cultures; and Gram stains in liquid medium, using BacT/ALERT® 3D (MB/BacT 240), which can perform 20 cultures per day
- Conserve sputum samples in a refrigerator
- Measure CD4 counts (TruCount® test and FacsCalibur® cytometer) and HIV RNA (real-time PCR) <sup>40</sup>
- Perform HIV-1 genotype resistance tests. Resistance definitions comply with the IAS-USA list ([www.iasusa.org/resistance\\_mutations/index.html](http://www.iasusa.org/resistance_mutations/index.html)) and resistance profiles will be interpreted using the ANRS classification system ([www.hivfrenchresistance.org](http://www.hivfrenchresistance.org)).

The CeDReS laboratory has enrolled in an international program of CD4 measurement quality control (UK-NEQAS, QASI and SANEQUAS). CeDReS will ensure the quality of its mycobacterium analyses by sending samples to the Pasteur Institute of Côte d'Ivoire, national mycobacteriology reference laboratory for Côte d'Ivoire, and the mycobacteriology laboratory of Pitié Salpêtrière Hospital in Paris, which is the national mycobacteriology reference laboratory for France. The virology laboratory at Necker Hospital in Paris will control the quality of the HIV RNA and genotype tests performed at CeDReS.

### 4.3 PATIENT CARE

All HIV-infected adults who present to care at participating centers and meet the trial's eligibility criteria (Section 5) will be invited to participate in the study. HIV care in Côte d'Ivoire has been subsidized since 2004, thanks to PEPFAR, the Global Fund to Fight AIDS, Tuberculosis and Malaria, and the Côte d'Ivoire Ministry of Health and Public Hygiene's National HIV Care Program (PNPEC). This subsidized care includes:

- CD4 count tests, complete blood counts and serum transaminase levels free of charge, as long as they are conducted according to national recommendations: serum transaminase and serum creatinine measurements, complete blood count and CD4 count test at initiation of care; routine complete blood counts and CD4 count tests every six months; and HIV RNA tests 12 months, 18 months and 24 months after ART initiation if patients have failed immunologically.
- Antiretroviral drugs free of charge (Order of the Côte d'Ivoire Ministry of Health and Public Hygiene, 20 August, 2008) regardless of the regimen, as long as they are included in the nationally approved list of drugs.

Patients who choose to enroll in our trial will continue to receive subsidized care at the end of the trial. The trial will cover the costs of both antiretroviral and common non-antiretroviral drugs, as well as complementary exams, hospitalizations and transportation costs, in order to ensure that patients receive care completely free of charge.

## 5 ELIGIBILITY

### 5.1 INCLUSION CRITERIA

- HIV-1 or HIV-1 + HIV-2 infection
- Age  $\geq 18$  years
- Home address in any district of the greater Abidjan area
- No ongoing active tuberculosis
- CD4 count  $< 800/\text{mm}^3$  and no criteria for starting ART according to the most recent WHO guidelines.
- Written informed consent

### 5.2 EXCLUSION CRITERIA

- Pregnancy or breastfeeding
- HIV-2 infection alone
- Clinical signs suggesting a severe disease (including tuberculosis) that has not yet been diagnosed, such as fever, wasting, diarrhea or unexplained cough
- Previous ART initiation
- Known severe renal, cardiac or hepatic disease

## 6 INTERVENTIONS

Study subjects will be randomized into one of four arms:

### Arm 1 (WHO ART): ART initiation according to most recent WHO criteria

- ART initiation at any time during the trial whenever WHO criteria for starting ART are fulfilled:
  - o *During the period in which the WHO 2006 guidelines were used (March 1, 2008 to November 30, 2009), the criteria for ART initiation were: one CD4 count  $< 200/\text{mm}^3$ ; OR WHO clinical stage 4; OR one CD4 count  $200\text{-}350/\text{mm}^3$  and WHO clinical stage 2 or 3.*
  - o *During the period in which the WHO 2010 guidelines were used (December 1, 2009 to July 31, 2013), the criteria for ART initiation were: two consecutive CD4 counts  $< 350/\text{mm}^3$ , regardless of WHO stage; OR WHO stage 3 or 4.*
  - o *During the current period (from August 1, 2013 on), the following WHO 2013 criteria are used: two consecutive CD4 counts  $< 350/\text{mm}^3$ , regardless of WHO stage; OR WHO*

*stage 3 or 4. Furthermore, ART may be proposed to people who have not yet reached the WHO criteria, if their partner is known to be HIV seronegative. This decision is taken case by case by the treating team and the patient, after enquiry into the serological status of the partner and putting into perspective the individual decision to start early treatment, and the option of reinforcing prevention through careful use of condoms.*

### **Arm 2 (WHO ART-IPT): ART initiation according to most recent WHO criteria, *plus* IPT**

- ART initiation at any time during the trial if whenever WHO criteria for starting ART are fulfilled (see above).
- 300 mg of INH once a day, in the morning, two hours before any food intake, for six months, starting one month after study inclusion (M1).

### **Arm 3 (Early ART): Early ART initiation**

- ART initiation on the day of inclusion.

### **Arm 4 (Early ART-IPT): Early ART initiation *plus* IPT**

- ART initiation on the day of inclusion
- 300 mg of INH once a day in the morning two hours before any food intake for six months, starting one month after study inclusion (M1)

## **7 TRIAL ENDPOINTS**

### **7.1 PRIMARY ENDPOINT**

The primary endpoint of the trial will combine all-cause death and severe HIV-related infectious disease or malignancy.

Severe HIV-related infectious diseases or malignancy are defined as: AIDS-defining diseases, non-AIDS-defining malignancies, and non-AIDS-defining invasive bacterial diseases.

Invasive bacterial diseases are defined as: any clinical features with bacteremia, and any clinical features fulfilling criteria for presumptive or definitive bacterial infection of a solid organ or aseptic cavity (pneumonia, pleurisy, meningitis, pyomyositis, pyelonephritis, prostatitis, orchitis, epididymitis, salpingitis, endocarditis, cholecystitis, arthritis, osteomyelitis, visceral abscess).

We will not consider ear infections, sinus infections, and bacterial enteritis to be invasive bacterial infections, unless they are associated with a positive blood culture

### **7.2 SECONDARY ENDPOINTS**

The secondary endpoints of the trial are:

- Grade 3 or 4 clinical events and laboratory test results, as defined by the ANRS classification system of drug-related adverse events (Appendix 2);
- Adherence to treatment
- Virological suppression
- Resistance to antiretroviral medications
- CD4 count evolution
- Individual socio-economic characteristics
- Quality of life
- Cost-effectiveness of strategies<sup>42</sup>

## 8 TRIAL CONDUCT

### 8.1 PRE-INCLUSION CLINIC VISIT

The medical investigator or his/her representative will conduct the pre-inclusion clinic visit. The patient will also see a social worker at this time. All patients who are followed in one of the nine trial centers and meet the trial eligibility criteria (Section 5) must attend this clinic visit.

When determining whether patients have a CD4 counts  $<800/\text{mm}^3$  and no criteria for starting ART immediately, we will only consider CD4 count tests performed within six months of the pre-inclusion visit at one of the following laboratories: CeDReS, CIRBA, Retro-CI, the CHU de Yopougon, the Hôpital Général d'Abobo Nord, and CePREF.

Patients will be judged not to have ongoing active tuberculosis if they do not show any general unexplained signs or symptoms, including (but not only) fever, wasting, cough, chest pain, or expectoration.

No systematic chest X-Ray will be required in patients with no signs or symptoms evocative of TB. In patients with sign or symptoms evocative of TB, physicians will run standard investigations, according to national procedures.

If the patient meets all pre-inclusion eligibility criteria, the physician and social worker will provide him/her with information on the objective, nature, constraints and foreseeable risks of the trial, and will answer all of the patient's questions. The information sheet will be used to facilitate the discussion. We will emphasize the importance of perfect adherence to ART from the start. We will then ask the patient to think about his/her options, to conduct a confirmatory CD4 count test (at the CeDReS laboratory), and to return two weeks (or up to one month) later. At this visit, the patient will either be included or request additional information before making a final decision.

At the end of the pre-inclusion visit, the social worker will fill out the "*evaluation of comprehension form*" and the physician will fill out the "*pre-inclusion form*" and the "*CD4 count measurement for eligibility form*." The "*pre-inclusion form*" will be sent to the trial coordination center in Abidjan on the same day. The "*CD4 count measurement for eligibility form*" and a blood sample will be sent to the CeDReS laboratory on the same day. All forms and samples will include a unique anonymous personal identifier, consisting of two letters representing the study center followed by a sequential number. The physician will note this number on the second page of the patient's health record.

### 8.2 CONSENT, INCLUSION AND RANDOMIZATION

If a patient who attended the pre-inclusion visit returns to the study center but either does not want to be included or no longer meets the eligibility criteria, the physician must fill out the "*non-inclusion form*."

Patients will be included in the trial and randomized into a trial arm on the same day. Inclusion and randomization must occur within one month of the last known CD4 count measurement. If the period exceeds one month, either because the patient chose to delay inclusion, or because s/he developed temporary non-inclusion criteria between the pre-inclusion visit and the scheduled inclusion visit, a new CD4 count test will need to be performed.

#### 8.2.1 Consent

On the day of inclusion/randomization (M0 visit), the medical investigator or his/her representative will:

- Verify that the patient meets all the inclusion criteria
- Obtain written informed consent. Patients will have to provide consent before any clinical or paraclinical exam related to the trial. If the patient agrees to participate in the trial, s/he and the physician will write their first and last names clearly, and sign and date the consent form. The



original copy of the consent form will be stored in the study center in a location that is secure and inaccessible to other clinic employees. The trial monitors will retrieve these forms at the weekly study center meetings. They will transport them back to the trial coordination center and keep them in a location that is secure and inaccessible to others. Once all study subjects have been included, or at latest at the end of the trial, the consent forms will be sent to the ANRS or an ANRS representative, in accordance with the procedures the ANRS requires.

If we make any amendment to the trial that significantly modifies patient care or the trial procedures described in the original information sheet, we will modify the information sheet and consent form and obtain written informed consent again, as described above.

### 8.2.2 Randomization

Once patients provide written informed consent, they will be randomized into one of the four trial arms. The statistician of the Methodology and Management Center in Bordeaux, France will prepare the randomization sequence before the start of the trial. An equal number of patients will be randomized to each arm. Randomization will be stratified by study center.

Randomization will take place at the trial coordination center in Abidjan, where a hotline will be set up.

Once the investigator or physician has obtained all the results needed to include the patient in the trial, s/he will call the trial coordination center in Abidjan, where the trial monitor will select the patient's trial arm and an inclusion number, using a software program containing the pre-established randomization sequence. The trial monitor will give this information to the physician, who will note it in the "*inclusion form*." The trial monitor at the trial coordination center will sign a written confirmation of the trial arm and inclusion number and send it to the study clinic within 48 hours. This confirmation will be stored in the patient's observation file.

After the inclusion visit, the social worker will fill out the "*social worker inclusion form*" and "*quality of life form*". The medical investigator will also:

- Complete the "*inclusion form*" with the help of the social worker. This form will be sent to the trial coordination center in Abidjan on the same day. It will contain the unique anonymous personal identifier, consisting of two letters representing the study center followed by a sequential number. The physician will note this number on the second page of the patient's medical record. We will use it to identify all prescriptions and observations included in the patient's file until the end of the trial.
- Give the patient
  - o A prescription for the first month of treatment, as mandated by the arm in which the patient has been randomized.
  - o A prescription for routine laboratory tests: blood samples will be taken immediately at the study center and will be sent to the CeDReS laboratory later that day.
  - o A prescription for a chest x-ray: patients will receive directions to an imaging center, where they must perform the x-ray within 48 hours. All patients will perform the chest x-ray. It will serve as a point of comparison for future x-rays if patients develop symptoms of tuberculosis.
- Plan the following visit, which will occur eight days later (J8) for patients who initiate ART on the day of inclusion and one month later (M1) for patients who do not initiate ART on the day of inclusion.

## 8.3 ROUTINE TREATMENT

### 8.3.1 Cotrimoxazole prophylaxis

All patients whose CD4 counts are  $<500/\text{mm}^3$  and who do not have any allergies to sulfamides will start cotrimoxazole prophylaxis on the day of inclusion. They will discontinue cotrimoxazole when their CD4 counts increase to  $\geq 500/\text{mm}^3$ , as confirmed by two CD4 count tests performed within six months of each other.

### 8.3.2 INH prophylaxis

Physicians will prescribe INH to patients who are randomized to receive it (Section 6). These patients (arms 2 and 4) will initiate a six-month course of INH on the day of their M1 visit, as long as they meet the following criteria:

- No signs suggesting active tuberculosis at the M1 clinic visit
- According to test results from the laboratory tests performed at inclusion, serum transaminase levels are  $<2.5x$  the upper limit of normal

If the patient does not meet either of these criteria, the physician will refrain from prescribing INH prophylaxis for the rest of the trial.

The physician will fill out the “*INH chemoprophylaxis form*” at M1 for all patients who are randomized to receive INH prophylaxis (arms 2 and 4), regardless of whether or not they receive the treatment. The form serves to declare INH initiation or the reasons for not initiating INH.

### 8.3.3 ART

#### First-line ART

Study subjects will initiate ART based on the regimens listed above (Section 6).

The Côte d'Ivoire National HIV Care Program currently recommends initiating ART with two nucleoside reverse transcriptase inhibitors (NRTI) and one non-nucleoside reverse transcriptase inhibitor (NNRTI). Patients who cannot take NNRTIs should receive a ritonavir-boosted protease inhibitor (PI/r)<sup>29</sup>.

We will use the following regimens for first-line ART:

- Tenofovir/emtricitabine + efavirenz for all HIV-1-infected men, as well as HIV-1-infected women who fulfill the following two requirements: effective contraception use and no nevirapine use for prevention of mother-to-child transmission (PMTCT) up to six months before trial inclusion.
- Tenofovir/emtricitabine + lopinavir/ritonavir for all HIV-1+2-infected patients, as well as HIV-1-infected women who do not use effective contraception or who used nevirapine for PMTCT up to six months before trial inclusion.

The physician will fill out the “*ART form*” on the day of ART initiation, which occurs on the day of trial inclusion for patients in arms 3 and 4 and during follow-up for patients in arms 1 and 2. The physician will also fill out a “*monthly visit decision form*” when patients in arm 1 and arm 2 initiate ART.

#### Subsequent ART regimens

We will pay particular attention to drug-related adverse events such as lactic acidosis, hepatitis and renal disease. Severe adverse events will be declared and may entail treatment modification (Section 9).

When treatment modification is necessary due to a severe adverse event, we will choose one of the first-line regimens whenever possible (e.g. replace tenofovir/emtricitabine + efavirenz with tenofovir/emtricitabine + lopinavir/ritonavir; Section 8.3.3.1).

Patients who are observed to fail first-line tenofovir/emtricitabine + efavirenz will be assigned didanosine/abacavir + lopinavir/ritonavir or zidovudine/lamivudine + lopinavir/ritonavir.

If deterioration of renal function occurs but is not related to tenofovir, patients will continue to take tenofovir/emtricitabine. The dose will be lowered if creatinine clearance levels are 30-50 ml/min. If creatinine clearance is <30 ml/min, patients will discontinue tenofovir altogether.

When patients with positive hepatitis B antigens (HBsAg) are forced to discontinue tenofovir/emtricitabine, physicians will monitor their clinical state and transaminase levels monthly for three months following treatment modification, regardless of the drugs selected for the new regimen (which should include lamivudine or emtricitabine).

### **Acquisition of antiretroviral drugs**

Antiretroviral drugs will be:

- Either delivered free of charge by the Côte d'Ivoire Public Health Pharmacy. The Ministry of Health and Public Hygiene has guaranteed that all patients participating in this trial will have the same access to antiretroviral drugs as HIV-infected patients in Côte d'Ivoire who are not participating in the trial.
- Or delivered free of charge by pharmaceutical companies. Gilead Sciences and Merck & Co have agreed to provide tenofovir, emtricitabine and efavirenz to trial patients for free.

The Côte d'Ivoire Ministry of Health and Public Hygiene has promised to make the necessary drugs available to study subjects after the end of the trial, when patients will begin receiving care through the National HIV Care Program.

## **8.4 ROUTINE CLINIC VISITS AND LABORATORY TESTS**

Each study subject will be examined by the medical investigator or his/her representative monthly for the first three months (M1, M2, M3) and every three months thereafter (M6, M9, M12, M15, M18, M21, M24, M27, M30). Patients randomized to initiating ART according to the WHO and national criteria (arm 1 and arm 2) will have additional clinic visits one, two and three months (M1A, M2A, M3A) after initiating ART (M0A), regardless of the date of ART initiation. Patients will return to the regular frequency of clinic visits (M6A, M9A, etc.) after M3A.

Patients will also attend clinic:

- Eight days after initiating ART (J8), to discuss drug-related adverse events and to reiterate the importance of adhering to therapy. The physician will conduct this visit.
- One month after bi-annual routine laboratory tests (M7, M13, M19 and M25), to determine whether the patient's CD4 counts and HIV RNA require treatment modification. The patient will be asked either to call the study technician or to come to clinic. Physicians at the trial coordination center will prepare a list of those patients who must contact their physician. The study technician will use this list to determine whether or not patients are expected to attend additional clinic visits to discuss their treatment regimens.

At the end of each routine visit described above, the medical investigator will fill out the "*routine follow-up form*," which will be identified by the day's date. At M12, M24 and M30, the medical investigator will conduct a clinical exam focusing on lipodystrophy. S/he will fill out a "*lipodystrophy form*" and the social worker will fill out a "*social survey form*" and "*quality of life form*" after conducting a detailed interview with the patient.

**Table 1. Summary of routine follow-up and exams**

|                                                            | <i>Criteria needed 6 months before pre-inclusion</i> | Pre-inclusion (PI) | Inclusion (M0) <sup>(7)</sup> | J8  | M1, M2, M3, M9, M15, M21, M27, M33, M39, M45, M51, M57 <sup>(8)</sup> | M6, M12, M18, M24, M36, M42, M48, M54 <sup>(8)</sup> | M30, M60 |
|------------------------------------------------------------|------------------------------------------------------|--------------------|-------------------------------|-----|-----------------------------------------------------------------------|------------------------------------------------------|----------|
| Read and discuss trial                                     |                                                      | x                  | x                             |     |                                                                       |                                                      |          |
| Written informed consent                                   |                                                      |                    | x                             |     |                                                                       |                                                      |          |
| Routine clinic visit <sup>(1)</sup>                        | X                                                    | x                  | x                             | x   | x                                                                     | X                                                    | x        |
| “Lipodystrophy” clinic visit                               |                                                      |                    | x                             |     |                                                                       | °                                                    | x        |
| Chest x-ray                                                |                                                      |                    | x                             | (x) | (x)                                                                   | (x)                                                  | x        |
| Mycobacterium test                                         |                                                      |                    |                               | (x) | (x)                                                                   | (x)                                                  | (x)      |
| Complete blood count and CD4 count test                    | X                                                    | x                  | x                             |     |                                                                       | X                                                    | x        |
| HIV test                                                   | X                                                    |                    | x                             |     |                                                                       |                                                      |          |
| Plasma hepatitis B (HB) surface antigen test               |                                                      |                    | x                             |     |                                                                       |                                                      |          |
| Plasma HB core antibody and HB surface antibody            |                                                      |                    | (xx)                          |     |                                                                       |                                                      |          |
| Plasma HB virus DNA test <sup>(3)</sup>                    |                                                      |                    | (xx)                          |     |                                                                       | (xx)                                                 |          |
| Plasma HB e antigen and HB e antibody tests <sup>(4)</sup> |                                                      |                    | (xx)                          |     |                                                                       |                                                      |          |
| Transaminase and creatinine levels <sup>(5)</sup>          |                                                      |                    | x                             |     |                                                                       | X                                                    | x        |
| Cholesterol and triglyceride levels                        |                                                      |                    | x                             |     |                                                                       |                                                      | x        |
| Tuberculosis serology and interferon γ test <sup>(6)</sup> |                                                      |                    | x                             |     |                                                                       | (xx)                                                 |          |
| HIV-1 RNA test                                             |                                                      |                    | x                             |     |                                                                       | x                                                    | x †      |
| HIV-1 DNA PBMC                                             |                                                      |                    | (xx)                          |     |                                                                       |                                                      |          |
| Storage of serum and plasma in blood bank                  |                                                      |                    | x                             |     |                                                                       | x                                                    | x        |
| Storage of blood cells in blood bank                       |                                                      |                    | x                             |     |                                                                       | °                                                    | x        |
| Hemoglobin electrophoresis                                 |                                                      |                    | x                             |     |                                                                       |                                                      |          |

<sup>(1)</sup> Includes blood pressure and body mass index measurements

<sup>(2)</sup> If patient is HB surface antigen (HBsAg) negative

<sup>(3)</sup> If patient is HBsAg negative or HB core (HBc) antibody positive and HBs antibody negative

<sup>(4)</sup> If patient is HBsAg positive

<sup>(5)</sup> Includes routine creatinine clearance measurements

<sup>(6)</sup> The interferon γ test will be performed at M12 on the first 500 study subjects

<sup>(7)</sup> We will perform additional tests (complete blood count, CD4 count, creatinine, transaminase) on patients in arms 1 and 2 before they initiate ART if their previous laboratory tests were performed more than one month before inclusion.

<sup>(8)</sup> Once patients in arms 1 and 2 initiate ART, we will count time from the date of ART initiation (replace M1, M2, etc. with M1A, M2A, etc.).

(x) Any patient showing signs suggestive of active tuberculosis

(xx) Subject to additional funding

° At M12 and M24

† If HIV-1 RNA is detectable, we will perform a genotype resistance test.

## 8.5 OTHER CLINIC VISITS, ADDITIONAL TESTS AND MEDICATIONS

When study subjects become ill, they will have access to medical personnel during the business hours of their respective study centers. Patients will receive care in the form of consultations, inpatient day care (“*inpatient day care visit form*” to be filled out) and inpatient hospitalizations (“*inpatient hospitalization form*” to be filled out), depending on the severity of disease. Care will be provided in accordance with the examination and treatment procedures used in the Cotrimo-CI ANRS 059 and Trivacan ANRS 1269 trials. These procedures include:

- If the symptoms are severe or sustained and unexplained, and if clinical signs are general, physicians will examine appropriate specimens for the presence of mycobacteria (in sputum, blood, pleural fluid, peritoneal fluid, lymph node pus, cerebrospinal fluid, bone marrow, and stool).
- If the symptoms suggest tuberculosis, physicians will conduct exploratory imaging (chest x-ray, abdominal or cardiac ultrasound, and cerebral or chest CT scan) to determine whether the patient has clinical signs compatible with tuberculosis.
- If there is any suspicion of drug-induced hepatitis, physicians will measure transaminase, alkaline phosphatase and direct-reacting bilirubin levels.

If a patient acquires active tuberculosis, s/he will be treated according to the rules of the Côte d’Ivoire National Tuberculosis Program. The recommended first-line regimen currently consists of 2ERHZ/4RH. Whenever a patient is found to be infected with tuberculosis, we will perform a tuberculosis test and provide treatment in accordance with the results of the test.

When study personnel suspect that a patient is not adhering to therapy, the medical investigator will schedule an adherence visit, which will be carried out by the social worker. The social worker will fill out the “*adherence diagnosis form*” at the end of the visit and give it to the physician who requested it.

## 8.6 REPORTING OF MORBIDITY EVENTS

Any new morbidity event occurring between inclusion and the end of the trial must be reported if it meets the following criteria:

- WHO stage 2, 3, or 4 event
- HIV-related event, even if it does not fall within the WHO classification system (e.g. malaria and unclassified bacterial diseases)
- Severe event, according to the following criteria:
  - o Leads to death
  - o Leads to inpatient day care visit or inpatient hospitalization
  - o Leads to discontinuation of medications
  - o Temperature above 37.5°C
  - o May be a grade 3 or 4 drug-related adverse event
  - o Considered to be serious for any other reason, including impact on quality of life and need for frequent care

A morbidity episode will be classified as:

- *Prevalent*: if signs and symptoms began before inclusion AND the main criterion for diagnosing the disease was proved to already exist at inclusion.
- *Incident*: if signs and symptoms began after inclusion, OR the main criterion for diagnosing the disease appeared after inclusion.

Diagnoses of morbidity events will be validated as *certain*, *possible* or (tuberculosis only) *probable*. The criteria needed to validate tuberculosis are:

- *Definitive tuberculosis*
  - Clinical manifestations (including signs, symptoms, and evolution) suggestive of pulmonary and/or extra-pulmonary tuberculosis, AND
    - Positive culture for *Mycobacterium tuberculosis* complex of a body fluid or tissue, OR
    - Typical caseous or granulomatous appearance of a histological sample
- *Probable tuberculosis*
  - Clinical manifestations (including signs, symptoms, and evolution) suggestive of pulmonary and/or extra-pulmonary tuberculosis, AND
    - Smear-positivity for acid-fast bacilli (or typical appearance on immunofluorescence) in a body fluid or tissue, OR
    - At least one of the following: (i) Chest X-ray, CT scan or MRI images showing new-onset upper lobe opacities, cavitational lesions, or miliary opacities highly suggestive of tuberculosis; (ii) lymphocytic pleural effusion; (iii) bone X-ray, CT scan or MRI images suggestive of bone tuberculosis; (iv) abscessed peripheral lymphadenopathy.
  - AND
    - Significant improvement on anti-tuberculosis treatment
- *Possible tuberculosis*
  - Clinical manifestations (including signs, symptoms, and evolution) suggestive of pulmonary and/or extra-pulmonary tuberculosis, AND
    - No criteria met for any other specific disease
  - AND
    - Significant improvement on anti-tuberculosis treatment

The criteria needed to validate other diseases are shown in appendix 3.

A morbidity event is considered as *possibly or probably* associated with a drug if:

- The event occurs within a reasonable timeframe of giving the drug.
- AND, at least one of the following criteria are met :
  1. The event cannot be reasonably and exclusively explained by another cause, such as the patient's characteristics, an ongoing disease, or the administration of another toxic substance, AND
    - the signs and symptoms stop or improve after drug discontinuation or dose reduction OR
    - the event is a well known potentially severe side-effect of the drug, the drug is continued and the event leads to death within a reasonable timeframe of drug administration.
  2. The signs and symptoms stop or improve after drug discontinuation or dose reduction AND increase or reappear after drug reintroduction

The conclusion that death is *possibly or probably* associated with a morbidity event is a consensual decision of the event validation committee members.

The event validation committee (described in Section 12.3) is responsible for validating the criteria and making the final decision to report a morbidity event. Whenever a morbidity event is validated, the “*non-tuberculosis morbidity event validation form*”, “*tuberculosis validation form*” and “*end of anti-tuberculosis treatment form*” must be filled out.

## 8.7 WITHDRAWAL, DISCONTINUATION OF THE TRIAL ARM, DEVIATIONS

### 8.7.1 Withdrawal of consent and withdrawal from the trial

A patient will be considered to have *withdrawn from the trial* if s/he no longer wishes to remain in his/her assigned trial arm or attend the follow-up visits stipulated in the trial protocol.

A patient will be considered to have *withdrawn consent* if s/he no longer wishes to remain in his/her assigned trial arm, but also wishes to withdraw all data that have been recorded in the trial database. In this case, a “*withdrawal of consent form*” must be filled out.

### 8.7.2 Premature and definitive discontinuation of the trial

A patient will be considered to have *discontinued the trial* when s/he stops adhering to the treatment arm to which s/he was randomized – for whatever reason – but continues to be followed as recommended in the trial protocol (clinic visits, laboratory tests, and additional tests).

Reasons for premature discontinuation of the assigned trial arm may include:

- Any medical event requiring an interruption of care as defined by the assigned trial arm
  - o intolerance or severe drug-related adverse event;
  - o onset or exacerbation of an intercurrent disease;
  - o disease progression;
  - o pregnancy;
  - o non-adherence to prescribed medications that puts the patient at risk and results in treatment modification;
  - o any other reason that is not anticipated in the trial protocol
- Any other non-medical reason, including the subject’s will. This type of premature discontinuation will be considered as a deviation from the protocol. The trial monitor will be required to fill out the “*unjustified non-compliance with assigned trial arm form*.”

### 8.7.3 Loss to follow-up

When a patient who has not explicitly withdrawn consent or withdrawn from the trial does not show up for routine clinic visits, the social work team (social workers and patient association counselors, when appropriate and approved by the social workers) will search for him/her. The social work team will contact the patient via telephone or home visit, as long as s/he consented to home visits and provided a home address at the initial visit or later follow-up visits.

At the end of the search, the social worker will fill out the “*last visit form*.” The follow-up team will add patients to a “do not search” list if a search is considered to be useless after several unsuccessful attempts or if the patient has expressed the desire to be left alone.

### 8.7.4 Other deviations

Deviations from any regulatory aspect of the trial or eligibility criteria, except for those the trial coordination center in Bordeaux and the principal investigators may have waived, are considered to be major deviations from the protocol.

### 8.7.5 Consequences

Any patient who *withdraws from the trial* or *withdraws consent*, which s/he is entitled to do at any time, will no longer be bound to the procedures outlined in the trial protocol. This patient will, however, continue to receive the same free care from the same medical personnel as the other patients enrolled in the trial, until the planned end of the trial. When a patient wishes to *withdraw consent*, his/her data will be removed from the database and his/her laboratory samples will be destroyed. The medical investigator must identify the reason for withdrawal and determine whether the medical team can collect data on the primary outcome of the trial at the time of withdrawal.

Among patients who discontinue their assigned trial arm, there will be no modification in clinic visits, laboratory tests, or reimbursement of transportations costs and care for the duration of the trial.

The medical investigators of each site must report withdrawals, unjustified discontinuations and other major deviations to the trial coordination team in Abidjan at their weekly meetings. The trial coordination team will report the number of withdrawals, discontinuations, and deviations, as well as loss to follow-up, at each Data Safety Monitoring Board meeting.

## 9 SEVERE ADVERSE EVENTS

### 9.1 DEFINITION

An **adverse event** is defined as any symptom, clinical sign, disease or reaction that occurs or becomes worse during participation in biomedical research. Any intercurrent event can be considered an adverse event, even if it is not associated with the treatment strategies evaluated in the trial or the research conditions.

A **severe adverse event** is an adverse event that meets at least one of the following criteria:

- It is **fatal** or **life-threatening**;
- It leads to significant or prolonged **disability** or **incapacity**;
- It leads to **congenital defects** that will affect the children of the patient who has received the treatment evaluated in the trial;
- It leads to **hospitalization** or **prolonged hospitalization**;
- The medical investigator considers it to be **potentially severe**.

In accordance with ANRS requirements:

- We will consider all malignancies and “overdoses” as well as any **grade 4 clinical event or laboratory test result**, according to the ANRS classification system of adverse events, to be “severe” (non-exhaustive list);
- We will exclude any events that are only considered to be adverse because they led to “hospitalization” AND that meet at least one of the following criteria:
  - **Accidental** trauma, excluding pathological fractures and osteonecrosis
  - **Planned** surgery
  - HIV-related\* or -unrelated infectious disease that meets both of the following criteria:
    - “certain” or “probable” diagnosis
    - Non-iatrogenic, or iatrogenic but unrelated to any treatment assigned by the trial protocol and/or the medical investigation team
  - Non-infectious non-malignant disease that meets one of the two following criteria:



- HIV-related\*
- HIV-unrelated\* and pre-existing at inclusion without aggravation during follow-up

\* Diseases are considered to be “HIV-related” if they can be characterized as WHO clinical stage 2, 3 or 4 diseases. Diseases are considered to be “HIV-unrelated” if they do not fall within the WHO classification system <sup>41</sup> (Appendix 1).

**Unexpected adverse events** are adverse events whose type or severity is not consistent with the assigned trial arm.

## 9.2 DECLARATION

Any severe adverse event must be declared if it occurs:

- at any time after the patient **gives written informed consent**
- at any time during the planned **follow-up period**
- at any time up to **30 days after the end** of the planned follow-up period if it is likely to be related to the trial or if it leads to death
- **at any time** if it is likely to be related to the experimental strategy (for example severe events that may appear in the long-term, such as malignancies or congenital abnormalities)

The investigator must declare all suspected severe adverse events (regardless of cause) to the trial monitors at the trial coordination center in Abidjan, either in person or by telephone as soon as s/he observes them.

The trial monitor documents and validates the severe adverse event, fills out the “*initial declaration of severe adverse event form*” and sends it to both the trial coordination center in Bordeaux and the ANRS, with proof of delivery. The delay from the trial coordination team’s discovery of the suspected severe adverse event and declaration to the funder must not exceed the time requested by the funder.

After this initial notification, the medical investigators must follow the severe adverse event until its resolution. If the severe adverse event is ongoing at the time of the initial declaration, the medical investigator must fill out the “*additional declaration of severe adverse event form*.”

Before starting inclusions, we will work with the funder to determine the details to be included in the severe adverse event declaration forms, the definitions to be used in these forms (including cause), the deadline for declaring events, and additional conditions for declaration.

## 9.3 IMPLICATIONS FOR THE TRIAL DRUGS

Grade 3 or 4 severe hepatic events that occur in patients on INH will lead to permanent discontinuation of anti-tuberculosis prophylaxis. The medical investigator will declare INH discontinuations by filling out the “*INH chemoprophylaxis form*.” Patients will not reinstate INH, even if they interrupt other medications that may also have caused the adverse event.

Antiretroviral drug-related grade 3 or 4 adverse events will lead to discontinuation of the drug(s) and modification of the ART regimen, but patients will remain in the same trial arm.

## 10 PREGNANCIES AND NEWBORNS

### 10.1 TREATMENT DURING PREGNANCY AND BREASTFEEDING

If a patient becomes pregnant during the trial, she will immediately discontinue INH prophylaxis, as well as any ongoing non-antiretroviral treatments that are contra-indicated for pregnancy. She will not reinstate INH prophylaxis after delivery.

Women who are on ART when they are found to be pregnant will continue therapy. ART regimens will be modified if they contain drugs with potential embryo- or fetal toxicities, or if they are considered to be less safe than other alternative drugs. Unless new information leads the Scientific Advisory Board to decide otherwise, patients on tenofovir-emtricitabine-efavirenz will switch to zidovudine-lamivudine-lopinavir/ritonavir when they are found to be pregnant.

Among patients not already on ART, those with risk factors associated with premature delivery will initiate therapy at the beginning of the second trimester and those without risk factors will initiate therapy at the end of the second trimester. ART initiation will not depend on CD4 count. The selected regimens should not contain drugs with potential embryo- or fetal toxicities. Unless new information leads the Scientific Advisory Board to decide otherwise, these patients will initiate ART with zidovudine-lamivudine-lopinavir/ritonavir.

## 10.2 DECLARATION

The medical investigator will fill out the “*pregnancy follow-up form*” for all pregnancies, regardless of their outcome. This includes abortions (spontaneous, voluntary, or therapeutic) regardless of gestational age, as well as delivery via labor or Caesarean section regardless of outcome (live birth or stillbirth). The event validation committee will fill out the “*pregnancy follow-up form*” after delivery.

The trial monitors will send the “*pregnancy declaration form*” and the “*pregnancy follow-up form*” to both the trial coordination center in Bordeaux and the ANRS, with proof of delivery. The delay between the trial coordination team’s discovery of the pregnancy or its outcome and the declaration to the funder must not exceed the time requested by the funder.

We will describe the requirements for declaring pregnancies to the pharmaceutical companies providing medications in the contract between these companies and the ANRS.

## 10.3 CHILDREN BORN TO MOTHERS PARTICIPATING IN THE TRIAL

Children born while their mothers are participating in the trial will be followed according to the following procedure:

- At eight weeks: the medical investigator performs a plasma HIV-1 RNA PCR test; if it is positive, s/he performs a second test immediately; if it is negative while the mother is still breastfeeding, s/he performs a second test once the child has weaned;
- At six months: the child attends a consultation with a pediatrician who performs a clinical exam to determine whether the child’s development is normal or if additional tests are required;
- At 12 months: the medical investigator performs an HIV-1 and HIV-2 test; if it is positive, s/he he performs a second test immediately; if it is negative while the mother is still breastfeeding, s/he performs a second test once the child has weaned.

The monitoring team will record the results of the PCR and HIV tests in the “*child HIV status form*” in the mother’s file. The pediatrician will record the results of the clinical exam at six months in the “*six-month child examination form*.”

At each of the mother’s visits between zero and 18 months after delivery, the medical investigator will ask her about the child’s diet (followed by appropriate advice), health, weight and height (as recorded in the patient’s medical record). The medical investigator will record this information in the “*routine mother-child follow-up appendix form*” attached to the corresponding “*routine follow-up form*.”

Newborns who do not have a definitive diagnosis or who have been definitively diagnosed with HIV will be referred to the Departments of Pediatrics at CePReF, the CHU de Yopougon, the CHU de Treichville, the Hôpital Général d’Abobo, and CIRBA to initiate appropriate care.

## 11 STATISTICAL ANALYSES

### 11.1 SOFTWARE

We will use SAS® software versions 9.1 and higher (SAS Institute Inc., Cary, NC) to select observations of interest, prepare files, and conduct statistical analyses.

### 11.2 SAMPLE SIZE

We hypothesize that the cumulative probability of severe morbidity events (including AIDS-defining diseases, non-AIDS-defining malignancies, non-AIDS-defining bacterial diseases, and any disease of unknown origin leading to death) among patients with CD4 counts  $<800/\text{mm}^3$  at inclusion who initiate ART according to the WHO criteria is 10% at M30.

We hope to show a 40% reduction in morbidity at M30 among patients initiating ART immediately, compared to patients initiating ART according to the WHO criteria.

Using the sample size calculation formula for comparing survival between two strategies (nQuery), and using an  $\alpha$ -value of 5% and a  $1-\beta$  power of 80%, we estimated that the number of participants needed is  $726 \times 2 = 1,452$  patients.

Because of the factorial plan and the necessity to test interaction, we applied a +20% correction factor, leading to increase the sample size to  $1,452 \times 1.20 = 1742$ .

Finally, based on previous studies in the same setting, we estimated that 4.2% of patients could be lost to follow-up at M30, and applied an additional correction factor of  $R = 1 / (2p - 1)^2$  (where  $p = 1 - [\text{rate of loss to follow-up}]$ ). In this case, R was equal to 1.1918.

The number of participants needed was thus estimated to be  $1038 \times 2 = 2076$ .

### 11.3 ANALYSIS

#### 11.3.1 Study subjects included in the analysis

All patients should a priori be included in the analysis, including patients who died, were lost to follow-up, or discontinued the trial.

The Scientific Advisory Board may decide to exclude a patient from the analysis, provided the decision of excluding the patient is taken blinded to the trial arm and his/her progress since inclusion.

A patient may be excluded from the analysis if they meet one of the following criteria:

- Did not initiate the trial arm to which s/he was randomized (as long as s/he did not know to which group s/he was randomized)
- Withdrew consent
- Wrongfully included with respect to major eligibility criteria

#### 11.3.2 Baseline and follow-up characteristics

We will describe baseline and follow-up characteristics both overall and by trial arm.

Cumulative follow-up time will be calculated as the sum of follow-up days for each study subject, defined as the time from the date of randomization to the last day in the trial (date of the actual M30 visit; death, if prior to the date of the scheduled M30 visit; or date of last contact with study team, if prior to the date of the scheduled M30 visit and the participants is not known to have died prior to the scheduled M30 visit).

For the qualitative variables, we will report numbers, percentages and confidence intervals, and will compare arms using logistic or polynomial regressions.

For the quantitative variables, we will report numbers, means, standard deviations, medians, ranges and interquartile ranges (IQRs). If the distribution of the variable is normal, we will compare arms using analysis of variance. If necessary, we will perform transformations to make the distribution normal.

For each endpoint, we will describe the incidence of first event and the cumulative incidence per 100 patient-years. We will use the Kaplan-Meier method to describe the probability (with 95% CI) of reaching the endpoint over time. The time at risk will be calculated as the sum of at-risk follow-up days for each study subject, defined as the time from the date of randomization to the first date among the following: actual M30 visit; death; first event; or last contact with study team.

### 11.3.3 Analysis of primary and clinical secondary endpoints

The primary analysis will be an intention-to-treat analysis.

This is a superiority trial. When comparing strategies and determining interactions, we will perform two-sided tests and use a type I error  $\alpha$ -value of 5%.

- **Main analysis:** For each primary and clinical secondary endpoint, we will analyze the efficacy of both interventions (Early ART and IPT) to reduce the risk of reaching the endpoints at 30 months. We will first use appropriate models to look for an interaction between the two interventions, and to verify the proportionality of risks. If there is not significant interaction between interventions, we will use proportional multivariate models to compare early ART to WHO ART, and IPT to no IPT, adjusting for the initial stratification variables (study centers) and for any other baseline characteristics that would statistically differ between strategies despite randomization. If there is a significant interaction between early ART and IPT, we will stratify analyses.
- **Ancillary analyses:**
  - Analysis of the entire follow up, including follow up after M30, on the whole population, with intention to treat on available data (for mortality alone)
  - Study of the effect of CD4 (at M30 for the primary endpoint, secondary endpoints, and on the entire follow up for mortality alone)
    - Analysis with test interaction CD4\*ARV\*INH to detect whether the effect of a treatment strategy varies according to the initial CD4 count
    - If there is no interaction with the initial CD4 count: analysis of the criteria of primary endpoint and secondary endpoints, adjusted according to initial CD4 counts, to highlight an effect of initial CD4 count on the primary endpoint result.
    - Analysis stratified by strata of initial CD4 (in three strata CD4<350/mm<sup>3</sup>, CD4 350-499/mm<sup>3</sup>, and CD4≥500/mm<sup>3</sup>);
    - Analysis with censoring of follow up at the first passage below 350 or below 500 CD4/mm<sup>3</sup> in patients in arm 1 and 2 who have not yet begun ART
- **Sensitivity analysis**
  - For the principal analysis
    - Missing data considered as failure, by applying the rule missing = failure
    - Missing data considered as a failure in strategies that considered for superior efficiency compared to reference strategies (strategies of maximum bias)
    - Analysis of those under treatment using available data, censoring at definitive termination of strategy.
  - For supplementary analysis stratified on initial CD4 counts: weightage of patients included before or after amendment N°2 by inversion of score of propensity (the probability of each patient to be in a given arm according to initial CD4 counts), to correct for a possible imbalance between the treatment groups, within the CD4 strata

### 11.3.4 Other endpoints

We will use the Cost-Effectiveness of Preventing AIDS Complications (CEPAC) International model to conduct cost-effectiveness analyses.

### 11.3.5 Safety criteria and interim analyses

Two safety criteria can be the subject of interim analysis: toxicity and efficacy

The toxicity safety endpoint is *all-cause mortality*. We have not planned to perform any intermediate analyses for this criterion. If the number of observed deaths is higher than anticipated, however, the DSMB may decide to carry one out.

The efficacy safety endpoint is *incidence of severe morbidity*

- **Description:** Data on the incidence of severe morbidity (AIDS-defining diseases, non-AIDS-defining diseases and non-AIDS-defining bacterial diseases) in sub-Saharan African adults with CD4 counts  $>350/\text{mm}^3$  are rare. We will monitor morbidity events to verify the hypotheses used to calculate the number of patients needed, and thus to ensure the study's optimal sample size and power, as well as minimal follow-up time. The DSMB will evaluate morbidity events once the first 400 patients (all arms combined) reach 18 months of follow-up. If the number of events is higher than anticipated (according to the hypotheses described in Section 11.2), the DSMB may suggest an adjustment of the sample size.
- **Intermediate analysis:** We have not planned any intermediate analyses for this criterion. If the number of severe morbidity events is higher than anticipated once all patients have reached 12 months of follow-up, the DSMB may decide to carry one out.

In this case an interim analysis is carried out, we will adjust the alpha coefficient using appropriate rules, to account for the number of tests <sup>43, 44,45, 46</sup>.

## 12 TRIAL MONITORING

### 12.1 SCIENTIFIC ADVISORY BOARD

#### 12.1.1 Members

The Scientific Advisory Board will consist of: (i) the principal investigators, coordinator, methodologist, biologist and statistician of the trial; (ii) outside HIV and tuberculosis experts; and (iii) an HIV advocacy organization representative. The ANRS and the pharmaceutical companies providing medications to the study subjects will be invited to all Scientific Advisory Board meetings as non-voting observers.

*List of outside experts belonging to the Temprano Scientific Advisory Board*

|                              |                                      |                                   |
|------------------------------|--------------------------------------|-----------------------------------|
| Emmanuel Bissagnene, MD      | Infectious disease specialist        | CHU Treichville, Abidjan          |
| Mireille Dosso, MD           | Biologist                            | Institut Pasteur de Côte d'Ivoire |
| Kouao Domoua, MD             | Pulmonologist                        | CHU Treichville, Abidjan          |
| Papa Salif Sow, MD, MSc      | Infectious disease specialist        | CHNU de Fann, Dakar               |
| Christian Perronne, MD, PhD  | Infectious disease specialist        | CHU Raymond Poincaré, Garches     |
| Christine Rouzioux, MD, PhD  | Virologist                           | CHU Necker, Paris                 |
| Pierre-Marie Girard, MD, PhD | Infectious disease specialist        | CHU Saint Antoine, Paris          |
| Vincent Jarlier, MD, PhD     | Biologist                            | CHU Pitié-Salpêtrière, Paris      |
| Genevieve Chene, MD, PhD     | Methodologist                        | Université Bordeaux 2, Bordeaux   |
| Virginie Ettiegne-Traore, MD | Public health specialist             | PNPEC, MSHP, Abidjan              |
| Jean-Marie Masumbuko, MD     | Advocacy organization representative | Association Ruban Rouge           |

*List of permanent non-voting observers*

|                                |                        |
|--------------------------------|------------------------|
| Sponsor representative         | ANRS, Paris            |
| Gilead Sciences representative | Gilead Sciences, Paris |
| Merck & Co representative      | Merck & Co             |

**12.1.2 Frequency of meetings**

The Scientific Advisory Board will meet before any new study center is opened, as well as once or twice per year until the end of the trial. The funder or one or several Board members may request a special meeting at any time.

**12.1.3 Role**

The role of the Scientific Advisory Board is to ensure that the study is carried out appropriately, not only scientifically but also clinically and ethically. The members of the Board report directly to the funder.

- They will ensure that the trial personnel carry out the trial properly, adhere to the trial protocol and maintain patient safety;
- They will guarantee that the trial remains scientifically relevant by ensuring the relevancy of the trial questions and the validity of the methods used to answer them;
- They will make all decisions regarding necessary and relevant protocol modifications, *such as*:
  - o Actions needed to facilitate patient recruitment
  - o Decisions to open or close participating study sites
- They will enforce the rules pertaining to access to the trial data as well as reports and publications of the results
- They will remain in contact with the funder, the DSMB and the principal investigators, and will make sure investigators and other trial personnel have access to up-to-date information.

Once the Scientific Advisory Board approves a protocol modification, the principal investigators will submit an amendment to the director of the ANRS for written approval.

At the end of each meeting, a report containing the meeting minutes will be circulated to the members of the Scientific Advisory Board and the director of the ANRS.

**12.2 Data Safety Monitoring Board****12.2.1 Members**

The DSMB will consist of the following members, as suggested by the principal investigators and selected by the director of the ANRS.

*List of the Temprano trial DSMB members*

|                                |                               |                                                                                                                         |
|--------------------------------|-------------------------------|-------------------------------------------------------------------------------------------------------------------------|
| Dominique Costagliola, PhD     | Epidemiologist                | U720 INSERM, Paris, France                                                                                              |
| Souleymane Mboup, MD, PhD      | Virologist                    | CHU Le Dantec, Dakar, Sénégal                                                                                           |
| Yazdanpanah Yazdan, MD, PhD    | Infectious disease specialist | CHU de Tourcoing, France                                                                                                |
| François-Xavier Blanc, MD, PhD | Pulmonologist                 | CHU Kremlin Bicêtre, France                                                                                             |
| Sinata Koulla-Shiro, MD, PhD   | Infectious disease specialist | Hôpital Central de Yaoundé, Cameroun                                                                                    |
| Brigitte Autra, MD, PhD        | Immunologist                  | CHU Pitié-Salpêtrière, Paris, France                                                                                    |
| Ogobara Doumbo, MD, PhD        | Epidemiologist                | Laboratoire de Parasitologie & Malaria Research Training Center, Hôpital du Point G & Faculté de Médecine, Bamako, Mali |

### 12.2.2 Frequency of meetings

The DSMB will meet once at the beginning of the inclusion phase, as well as every 12 months until the end of the trial. The funder, the Scientific Advisory Board or the DSMB may request to increase the frequency of these meetings.

### 12.2.3 Role

The DSMB will act as a consultant to the Scientific Advisory Board. Its members will provide general advice on the progress of the trial, including the rate of inclusions, the quality of follow-up, the overall rate of drug-related adverse events, changes in biological markers, the overall incidence of primary outcomes, and the number of study subjects needed.

They will help make difficult decisions that require an independent assessment while the trial is underway. Advice may be needed regarding:

- Premature discontinuation of the trial (because the rate of adverse events is high, the trial is no longer feasible, or the available data are sufficient)
- Substantial changes to the protocol that become necessary during the inclusion or follow-up phases, or to account for new scientific information

The DSMB will conduct and interpret intermediate analyses, as described in Section 11.4.

At the end of each meeting, a written report containing the DSMB's opinion will be circulated to the funder and the members of the Scientific Advisory Board.

## 12.3 EVENT VALIDATION COMMITTEE

### 12.3.1 Members

At each study center, the event validation committee will consist of: (i) the medical investigator; (ii) one or several other adequately trained physicians, selected by the medical investigator; (iii) a representative of the trial monitoring team, selected by the principal investigators.

### 12.3.2 Frequency of meetings

The event validation committee will meet once every three months at each study center. Each meeting will last long enough to review all of the events that will have occurred in the previous three months.

### 12.3.3 Role

The members of the event validation committee will review the clinical files of all study subjects in active follow-up at the study center. They will validate the criteria that require morbidity event declarations. The events that must be declared and the criteria defining them are described in Section 8.7 and Appendix 3.

Once an event is validated, one of the following forms must be filled out:

- "*Pregnancy follow-up form*"
- "*Tuberculosis validation form*"
- "*End of anti-tuberculosis treatment form*"
- "*Morbidity event declaration form*"

## 13 ETHICS AND REGULATIONS

### 13.1 ADHERENCE TO RECOMMENDATIONS

The funder and the investigators are committed to conducting this study in accordance with the Helsinki Declaration (Ethical principles for the medical community regarding human experimentation; Appendix 4).

We will submit the trial protocol, any amendments, the information sheet and the consent form to the Côte d'Ivoire National Ethics Committee, the National HIV Care Program (PNPEC) within the Ministry of Health and Public Hygiene, and the National Tuberculosis Program for their approval.

We will submit the protocol amendments, the information sheet and the consent form of the trial to the Pharmacy and Medication Department of the Côte d'Ivoire Ministry of Health and Public Hygiene.

### **13.2 PROTOCOL AMENDMENTS**

The principal investigators must write an amendment to the trial protocol before making any modifications that may have a substantial impact on the protection of study subjects, the validity of the trial, the trial results, the interpretation of scientific documents supporting the research, or the methods used to carry out the study. Once the Scientific Advisory Board approves the amendment, the principal investigators may submit it to the funder for approval. If the funder endorses the trial modifications, the principal investigators and the funder sign the amendment, using the same process as for the initial protocol.

The principal investigators must inform the funder if the proposed modifications are minor, but they do not need to submit an amendment.

### **13.3 PATIENT CONFIDENTIALITY**

Each study subject will be assigned a unique anonymous personal identifier, consisting of two letters representing the study center and four digits representing the patient number at that study center. This code will be the only patient identifier on any document related to the trial (patient file and laboratory exam request forms), as well as in the electronic trial database. There will be no link between the name of the patient and his/her personal identifier in the central trial database or in the study center databases, even if these databases are not related to the Temprano trial.

### **13.4 INSURANCE AND PATIENT CARE**

The funder of the study has taken out insurance in accordance with the law. The ANRS may request to see a copy of the insurance certificate at any time.

The budget for this study will ensure that each subject receives the following benefits throughout follow-up: reimbursement of transportation to and from the study center at each clinic visit (routine and unplanned), additional procedures and exams (related or unrelated to the trial) free of charge if requested or approved by the study's medical team, antiretroviral medications and essential non-antiretroviral medications (related or unrelated to the trial) free of charge if prescribed or approved by the study's medical team. The medical team will allow and purchase medications and additional procedures automatically without prior approval, based on a list established before initiation of the trial. This list will be similar to that used for a previous trial, Trivacan ANRS 1269. The medical investigator of the study center and the trial coordinator or trial monitor will discuss procedures that are not on this list on a case by case basis. The trial will completely reimburse patients for medical procedures and hospitalizations occurring outside of the trial study centers if the medical investigator and trial coordinator or trial monitor decide that they were justified. The trial coordinator and trial monitors will be available at all times for these discussions.

Once patients complete 30 months of follow-up in the trial, they will continue to receive care and treatment according to the conditions defined by the Côte d'Ivoire Ministry of Health and Public Hygiene: access to subsidized ART and biannual routine laboratory tests, at a monthly cost of 1000 FCFA. The Ministry of Health and Public Hygiene has committed to providing these patients with their current ART regimen once the trial ends. Patients will be able to continue their medical follow-up at the same study center with the same medical team, or at any other HIV care center of their



choice in Côte d'Ivoire. If a patient decides to transfer to a different HIV care center, the trial team will transfer his/her medical records to facilitate the continuity of care.

Six months before the end of the trial, the medical investigator will explain the trial exit conditions and details of post-trial care to the patient, both in verbal and written form.

### 13.5 FILING AND STORAGE OF DOCUMENTS AT TRIAL COMPLETION

The following trial-related documents will be archived:

- By the principal investigators, **for 15 years following the end of the trial**
  - o The original files of patients who provided written informed consent
  - o All other documents and mail related to the trial
- By the trial coordination centers in Abidjan and Bordeaux (on behalf of the funder), **for 15 years following the end of the trial**
  - o The trial protocol and potential amendments to the protocol
  - o Patient files
  - o All other documents and mail related to the trial
  - o The original copies of the signed consent forms

The director of INSERM Unité 897 will be responsible for these documents for the duration of the required data storage time.

### 13.6 TRIAL REGISTRATION

This trial is registered as number NCT00495651 at <http://www.clinicaltrials.gov/>.

## 14 MONITORING AND GOOD CLINICAL PRACTICE

### 14.1 GENERAL ORGANIZATION

The trial coordination center teams in Abidjan (Programme PAC-CI, ANRS site in Abidjan) and Bordeaux (INSERM Unité 897) will monitor the trial, as mandated by the ANRS and in accordance with established regulations and recommendations regarding Good Clinical Practice.

### 14.2 DATA COLLECTION INSTRUCTIONS

Each investigator will receive a detailed written description of the trial procedures. Trial personnel will attend a set of meetings regarding these procedures several months before the beginning of the study.

Data will be collected in observation files (one per patient).

The medical investigator or his/her designated representative will fill out all of the forms in the observation file. A full-time study technician committed to ensuring that the trial is carried out smoothly will compile, verify and code patient data. The forms will be handed directly to: (i) the driver of the trial coordination center, who will hand them to the coordination center's data entry secretary; or (ii) the trial coordination center's data entry secretary if the study center is close to the coordination center. Once the data have been entered into the trial database, the forms will be returned to the study center via the same route and handed directly to the study technician who will add them to the patient's observation file, under the supervision of the study center's medical

investigator. This entire procedure, from filling out the form to adding it to the observation file will take no longer than 48 hours.

The procedure for prescriptions and laboratory exam results will differ from the procedure described above:

- Prescriptions will be written in three copies: one will be given to the patient, one will be archived in the pharmacy of the study center, and the third will remain in the patient's observation file. The "pharmacy management assistant" will enter the prescription information into the trial database directly, without going through the trial coordination center.
- The CeDReS laboratory will provide two copies of the laboratory test results. One will be transported to the study center by the driver of the trial coordination center on the day the results become available. It will be archived in the patient's observation file within 24 hours, under the supervision of the study technician and the study center's medical investigator. The other copy will be transported to the trial coordination center by the center's driver on the day the results become available. The data will then be entered into the trial database and the form will be archived.

A "transmission notebook" will record the transmission/reception of all laboratory exam results and components of the observation file.

### 14.3 STUDY CENTER MONITORING

Once the meetings describing the trial procedures described above are complete, the principal investigators will organize an opening assembly for the investigators of each participating study center and laboratory before beginning pre-inclusions. At this assembly, each investigator will receive a folder containing all of the official trial documents.

The trial monitor and trial coordinator will meet with the trial staff at each study center every two weeks, from the first pre-inclusion to the end of the trial.

The goals of these meetings will be:

- To verify that the trial is being carried out in accordance with the protocol and Good Clinical Practice;
- To discuss difficult patient files, resolve these problems, and optimize patient care;
- To discuss any file the trial monitoring team deems problematic after having reviewed the trial database. Depending on the trial phase, these files may involve patients: (i) who were wrongfully included in the trial or who initiated ART at the wrong time; (ii) who are in trial arms 1 or 2 and meet ART initiation criteria; (iii) who are lost to follow-up; (iv) whose laboratory test results require special attention; (v) whose file was discussed at a previous meeting, at which decisions were deferred to a later date; (vi) who modified their ART regimen, etc.;
- To prepare severe adverse event declarations to be sent to the funder and the trial coordination center in Bordeaux.

The clinical research assistant of the trial coordination center in Bordeaux will verify the following under the supervision of the trial coordinator and trial monitors:

- That inclusion decisions conform to inclusion and exclusion criteria (between the pre-inclusion and inclusion visits), according to patient files (baseline data)
- That 100% of the informed consent forms are valid.

The trial monitor and data manager will verify the following once a month, under the supervision of the trial coordinator:

- That the files containing the official trial documents at each study center and at the trial coordination center are up-to-date.

- That the data entered into the trial database are exhaustive and match the information in the patient forms, in the patient observation files, and in other tables (cross-check).

#### **14.4 AUDIT - INSPECTION**

Internal audit: the trial monitor from the trial coordination center in Bordeaux will visit Abidjan twice a year. His objective will be to ensure the quality of the trial. At the end of his visit, he will write an internal report, which will be discussed at a trial investigator meeting and sent to the members of the Scientific Advisory Board.

Funder audit: The ANRS or competent health authorities may request an independent inspector to audit the trial at any time. The objective of this audit will be to ensure the quality of the trial, the validity of the results, and the trial's adherence to the law and established regulations.

### **15 PUBLICATION OF RESULTS**

The trial coordination centers in Abidjan and Bordeaux will analyze the data provided by the study centers. The results of these data analyses will be reported in written form and sent to the Scientific Advisory Board. Once the reports are completed, the trial investigators will be able to prepare publications or written or oral presentations. The final version of publications and presentations will require the approval of all authors and principal investigators.

The article reporting the main findings of the trial will contain the names of the funder, all of the investigators who included or followed the study subjects, the members of the Scientific Advisory Board and the DSMB, and the pharmaceutical companies providing medications to the study subjects. In accordance with the contract between the pharmaceutical companies and the ANRS, the trial investigators will send all articles and presentations to these companies before submitting them to journals or conferences.

## 16 REFERENCES

1. Lucas SB, Hounnou A, Peacock C, Beaumel A, Djomand G, N'Gbichi JM, et al. The mortality and pathology of HIV infection in a west African city. *Aids* 1993;7:1569-79.
2. Ackah AN, Coulibaly D, Digbeu H, Diallo K, Vetter KM, Coulibaly IM, et al. Response to treatment, mortality, and CD4 lymphocyte counts in HIV-infected persons with tuberculosis in Abidjan, Cote d'Ivoire. *Lancet* 1995;345:607-10.
3. Colebunders R, Bastian I. A review of the diagnosis and treatment of smear-negative pulmonary tuberculosis. *Int J Tuberc Lung Dis* 2000;4:97-107.
4. Post FA, Wood R, Pillay GP. Pulmonary tuberculosis in HIV infection: radiographic appearance is related to CD4+ T-lymphocyte count. *Tuber Lung Dis* 1995;76:518-21.
5. Kramer F, Modilevsky T, Waliyany AR, Leedom JM, Barnes PF. Delayed diagnosis of tuberculosis in patients with human immunodeficiency virus infection. *Am J Med* 1990;89:451-6.
6. Harries AD, Hargreaves NJ, Gausi F, Kwanjana JH, Salaniponi FM. High early death rate in tuberculosis patients in Malawi. *Int J Tuberc Lung Dis* 2001;5:1000-5.
7. Korenromp EL, Scano F, Williams BG, Dye C, Nunn P. Effects of human immunodeficiency virus infection on recurrence of tuberculosis after rifampin-based treatment: an analytical review. *Clin Infect Dis* 2003;37:101-12.
8. Sonnenberg P, Glynn JR, Fielding K, Murray J, Godfrey-Faussett P, Shearer S. How soon after infection with HIV does the risk of tuberculosis start to increase? A retrospective cohort study in South African gold miners. *J Infect Dis* 2005;191:150-8.
9. Lawn SD, Badri M, Wood R. Tuberculosis among HIV-infected patients receiving HAART: long term incidence and risk factors in a South African cohort. *Aids* 2005;19:2109-16.
10. Seyler C, Toure S, Messou E, Bonard D, Gabillard D, Anglaret X. Risk factors for active tuberculosis after antiretroviral treatment initiation in Abidjan. *Am J Respir Crit Care Med* 2005;172:123-7.
11. Kwara A, Flanigan TP, Carter EJ. Highly active antiretroviral therapy (HAART) in adults with tuberculosis: current status. *Int J Tuberc Lung Dis* 2005;9:248-57.
12. Lawn SD, Bekker LG, Miller RF. Immune reconstitution disease associated with mycobacterial infections in HIV-infected individuals receiving antiretrovirals. *Lancet Infect Dis* 2005;5:361-73.
13. Pape JW, Jean SS, Ho JL, Hafner A, Johnson WD, Jr. Effect of isoniazid prophylaxis on incidence of active tuberculosis and progression of HIV infection. *Lancet* 1993;342:268-72.
14. Whalen CC, Johnson JL, Okwera A, Hom DL, Huebner R, Mugenyi P, et al. A trial of three regimens to prevent tuberculosis in Ugandan adults infected with the human immunodeficiency virus. Uganda-Case Western Reserve University Research Collaboration. *N Engl J Med* 1997;337:801-8.
15. Halsey NA, Coberly JS, Desormeaux J, Losikoff P, Atkinson J, Moulton LH, et al. Randomised trial of isoniazid versus rifampicin and pyrazinamide for prevention of tuberculosis in HIV-1 infection. *Lancet* 1998;351:786-92.
16. Mwinga A, Hosp M, Godfrey-Faussett P, Quigley M, Mwaba P, Mugala BN, et al. Twice weekly tuberculosis preventive therapy in HIV infection in Zambia. *Aids* 1998;12:2447-57.
17. Hawken MP, Meme HK, Elliott LC, Chakaya JM, Morris JS, Githui WA, et al. Isoniazid preventive therapy for tuberculosis in HIV-1-infected adults: results of a randomized controlled trial. *Aids* 1997;11:875-82.

18. Gordin F, Chaisson RE, Matts JP, Miller C, de Lourdes Garcia M, Hafner R, et al. Rifampin and pyrazinamide vs isoniazid for prevention of tuberculosis in HIV-infected persons: an international randomized trial. Terry Bein Community Programs for Clinical Research on AIDS, the Adult AIDS Clinical Trials Group, the Pan American Health Organization, and the Centers for Disease Control and Prevention Study Group. *Jama* 2000;283:1445-50.
19. Gordin FM, Matts JP, Miller C, Brown LS, Hafner R, John SL, et al. A controlled trial of isoniazid in persons with anergy and human immunodeficiency virus infection who are at high risk for tuberculosis. Terry Bein Community Programs for Clinical Research on AIDS. *N Engl J Med* 1997;337:315-20.
20. Bucher HC, Griffith LE, Guyatt GH, Sudre P, Naef M, Sendi P, et al. Isoniazid prophylaxis for tuberculosis in HIV infection: a meta-analysis of randomized controlled trials. *Aids* 1999;13:501-7.
21. World Health Organization & UNAIDS. Preventive therapy against tuberculosis in people living with HIV. *Wkly Epidemiol Rec* 1999;74:385-400 (disponible à: <http://www.who.int/wer/pdf/1999/wer7446.pdf>).
22. Perriens JH, St Louis ME, Mukadi YB, Brown C, Prignot J, Pouthier F, et al. Pulmonary tuberculosis in HIV-infected patients in Zaire. A controlled trial of treatment for either 6 or 12 months. *N Engl J Med* 1995;332:779-84.
23. Fitzgerald DW, Desvarieux M, Severe P, Joseph P, Johnson WD, Jr., Pape JW. Effect of post-treatment isoniazid on prevention of recurrent tuberculosis in HIV-1-infected individuals: a randomised trial. *Lancet* 2000;356:1470-4.
24. Churchyard GJ, Fielding K, Charalambous S, Day JH, Corbett EL, Hayes RJ, et al. Efficacy of secondary isoniazid preventive therapy among HIV-infected Southern Africans: time to change policy? *Aids* 2003;17:2063-70.
25. Anglaret X, Taelman H, Ladner J, Batungwanayo J, Dabis F. Tuberculosis and chemoprophylaxis in Africa. *Lancet* 1995;345:867-8.
26. Quigley MA, Mwinga A, Hosp M, Lisse I, Fuchs D, Porter JDH, et al. Long-term effect of preventive therapy for tuberculosis in a cohort of HIV-infected Zambian adults. *Aids* 2001;15:215-22.
27. Johnson JL, Okwera A, Hom DL, Mayanja H, Mutuluza Kityo C, Nsubuga P, et al. Duration of efficacy of treatment of latent tuberculosis infection in HIV-infected adults. *Aids* 2001;15:2137-47.
28. World Health Organization. Antiretroviral therapy for HIV infection in adults and adolescents in resource-limited settings: towards universal access. Recommendations for a public health approach. 2006 revision. Available from: <http://www.who.int/hiv/pub/guidelines/WHO%20Adult%20ART%20Guidelines.pdf>. 2006.
29. World Health Organization. Antiretroviral therapy for HIV infection in adults and adolescents; Recommendations for a public health approach (2010 version). Available from: <http://www.who.int/hiv/pub/arv/adult2010/en/index.html>. 2010.
30. Severe P, Pape JW, Fitzgerald D. A randomized clinical trial of early versus standard antiretroviral therapy for HIV-infected patients with a CD4+ cell count of 200-350 cells/ml (CIPRAHT001). . 49th Interscience Conference on Antimicrobial Agents and Chemotherapy; September 12-15, 2009; San Francisco, California Abstract H-1230c
31. El-Sadr WM, Lundgren JD, Neaton JD, Gordin F, Abrams D, Arduino RC, et al. CD4+ count-guided interruption of antiretroviral treatment. *N Engl J Med* 2006;355:2283-96.
32. Emery S, Neuhaus JA, Phillips AN, Babiker A, Cohen CJ, Gatell JM, et al. Major clinical outcomes in antiretroviral therapy (ART)-naive participants and in those not receiving ART at baseline in the SMART study. *J Infect Dis* 2008;197:1133-44.

33. University of Minnesota CaTSl, . Strategic Timing of Antiretroviral Treatment (START). In: ClinicalTrials.gov [Internet]. Bethesda (MD): National Library of Medicine (US). 2000- [cited 2010 Nov 08]. Available from: <http://www.clinicaltrials.gov/ct2/show/NCT00867048>
34. Anglaret X, Messou E, Ouassa T, Toure S, Dakoury-Dogbo N, Combe P, et al. Pattern of bacterial diseases in a cohort of HIV-1 infected adults receiving cotrimoxazole prophylaxis in Abidjan, Cote d'Ivoire. *AIDS* 2003;17:575-84.
35. Whitworth J, Morgan D, Quigley M, Smith A, Mayanja B, Eotu H, et al. Effect of HIV-1 and increasing immunosuppression on malaria parasitaemia and clinical episodes in adults in rural Uganda: a cohort study. *Lancet* 2000;356:1051-6.
36. Moh R, Danel C, Messou E, Ouassa T, Gabillard D, Anzian A, et al. Incidence and determinants of mortality and morbidity following early antiretroviral therapy initiation in HIV-infected adults in West Africa. *Aids* 2007;21:2483-91.
37. WHO. WHO Expert Consultation on Cotrimoxazole Prophylaxis in HIV Infection. WHO technical report series. Reference number: WHO/HIV/2006.01. <http://www.who.int/hiv/pub/meetingreports/ctxprophylaxismeeting.pdf>.
38. Granich RM, Gilks CF, Dye C, De Cock KM, Williams BG. Universal voluntary HIV testing with immediate antiretroviral therapy as a strategy for elimination of HIV transmission: a mathematical model. *Lancet* 2009;373:48-57.
39. Dosso M, Bonard D, Msellati P, , , , et al. Primary resistance to antituberculosis drugs: a national survey conducted in Cote d'Ivoire in 1995-1996. Ivoirian Study Group on Tuberculosis Resistance. *Int J Tuberc Lung Dis* 1999;3:805-9.
40. Rouet F, Ekouevi DK, Chaix ML, Burgard M, Inwoley A, Tony TD, et al. Transfer and Evaluation of an Automated, Low-Cost Real-Time Reverse Transcription-PCR Test for Diagnosis and Monitoring of Human Immunodeficiency Virus Type 1 Infection in a West African Resource-Limited Setting. *J Clin Microbiol* 2005;43:2709-17.
41. WHO. WHO case definitions of HIV for surveillance and revised clinical staging and immunological classification of HIV-related disease in adults and children. <http://www.who.int/hiv/pub/guidelines/hivstaging/en/index.html> 2006.
42. Goldie SJ, Yazdanpanah Y, Losina E, Weinstein MC, Anglaret X, Walensky RP, et al. Cost-effectiveness of HIV treatment in resource-poor settings--the case of Cote d'Ivoire. *N Engl J Med* 2006;355:1141-53.
43. Pocock S. Group sequential methods in the design and analysis of clinical trials. *Biometrika* 1977;64:191-9.
44. Pocock S. *Clinical trials: a practical approach*, Wiley,Chichester, 1983, chapter "10.3 Repeated significance testing group sequential designs", 147-149.
45. O'Brien P, Fleming T. A multiple testing procedure for clinical trials. *Biometrics* 1979 35:549-56
46. Piantadosi S. *Clinical trials : a methodologic perspective*, Wiley, 1997, chapter "10.5.2 Group sequential designs may be easier to construct and apply", 246-248.

## 17 APPENDIX 1: ANRS SAE grading table (adapted from November 2008 version)

|                                                                                                     | Grade 1<br>Mild                                                         | Grade 2<br>Moderate                                                                              | Grade 3<br>Severe                                                                                 | Grade 4<br>Life threatening                                     |
|-----------------------------------------------------------------------------------------------------|-------------------------------------------------------------------------|--------------------------------------------------------------------------------------------------|---------------------------------------------------------------------------------------------------|-----------------------------------------------------------------|
| <b>HEMATOLOGY</b>                                                                                   |                                                                         |                                                                                                  |                                                                                                   |                                                                 |
| Haemoglobin (g/dl)                                                                                  | 8,0 – 9,40                                                              | 7,0 – 7,99                                                                                       | 6,5 – 6,99                                                                                        | < 6,50                                                          |
| Leucocytes (/mm <sup>3</sup> )                                                                      | 3 000 – 3 900                                                           | 2 000 – 2 999                                                                                    | 1 000 – 1 999                                                                                     | < 1 000                                                         |
| Neutrophils (/mm <sup>3</sup> )                                                                     | 1 000 – 1 500                                                           | 750 – 999                                                                                        | 500 – 749                                                                                         | < 500                                                           |
| Platelets (/mm <sup>3</sup> )                                                                       | 75 000 – 99 000                                                         | 50 000 – 74 999                                                                                  | 20 000 – 49 999                                                                                   | <20 000 or generalized petechiae                                |
| <b>Plasma BIOCHEMISTRY</b>                                                                          |                                                                         |                                                                                                  |                                                                                                   |                                                                 |
| AST (IU/l), ALT (IU/l)<br>Gamma GT (IU/l)<br>Alkaline phosphatase (IU/l)<br>Bilirubinaemia (µmol/l) | 1,25 – 2,50 x ULN                                                       | > 2,50 – 5,00 x ULN                                                                              | > 5,00 – 10,00 x ULN                                                                              | > 10,00 x N                                                     |
| Amylasemia (IU/l)                                                                                   | ≥1,25 – 2,50 x ULN                                                      | > 2,50 – 5,00 x ULN                                                                              | > 5,00 x ULN and/or echography or CT images showing acute pancreatitis, without shock             | Acute pancreatitis with shock.                                  |
| Creatinine Kinase (IU/l)                                                                            | 1,25 – 2,50 x ULN                                                       | > 2,50 – 5,00 x ULN                                                                              | > 5,00 – 10,00 x ULN                                                                              | > 10,00 x ULN                                                   |
| Triglyceridemia (mmol/l)                                                                            | NA                                                                      | 4,50 – 8,59                                                                                      | 8,60 – 13,70                                                                                      | > 13,70                                                         |
| Cholesterolemia (mmol/l)                                                                            | >ULN –7,75                                                              | >7,75 – 10,34                                                                                    | >10,34 – 12,92                                                                                    | >12,92                                                          |
| Hyponatremia (mmol/l)                                                                               | 130 – 135                                                               | 123 – 129                                                                                        | 116 – 122                                                                                         | <116                                                            |
| Hypernatremia mmol/l)                                                                               | 146 – 150                                                               | 151 – 157                                                                                        | 158 – 165                                                                                         | >165                                                            |
| Hypokaliemia (mmol/l)                                                                               | 3.2 – 3.4                                                               | 2.8 – 3.1                                                                                        | 2.5 – 2.7                                                                                         | <2.5                                                            |
| Hyperkaliemia (mmol/l)                                                                              | 5.6 – 6.0                                                               | 6.1 – 6.5                                                                                        | 6.6 – 7.0                                                                                         | >7.0                                                            |
| Creatininemia (µmol/l)                                                                              | 1.00 – 1.50 x ULN                                                       | > 1.50 – 3.00 x ULN                                                                              | > 3.00 – 6.00 x ULN                                                                               | > 6.00 x N or dialysis required                                 |
| Blood Urea Nitrogen (IU/l)                                                                          | 1.25 – 2.5 x ULN                                                        | 2.6 – 5.0 x ULN                                                                                  | 5.1 – 10 x ULN                                                                                    | > 10 x ULN                                                      |
| Hypocalcemia (mmol/l)                                                                               | 1.95 – 2.10                                                             | 1.75 – 1.94                                                                                      | 1.50 – 1.74                                                                                       | < 1.50                                                          |
| Hypercalcemia (mmol/l)                                                                              | 2.65 – 2.87                                                             | 2.88 – 3.13                                                                                      | 3.14 – 3.38                                                                                       | > 3.38                                                          |
| Hypophosphatemia (mg/dl)                                                                            | 2.0 – 2.4                                                               | 1.5 – 1.9                                                                                        | 1.0 – 1.4                                                                                         | <1.0                                                            |
| Hyperuricemia (µmol/l)                                                                              | 1.25 – 2.00 x ULN                                                       | > 2.00 – 5.00 x ULN                                                                              | > 5.0 – 10.00 x ULN                                                                               | > 10.00 x ULN                                                   |
| Hypoglycemia (mmol/l)                                                                               | 3.1 – 3.6                                                               | 2.2 – 3.0                                                                                        | 1.7 – 2.1                                                                                         | < 1.7                                                           |
| Diabetes/hyperglycaemia                                                                             | Fasting plasma glucose between 6.1 and 7 mmol/l. No treatment required. | Fasting plasma glucose > 7 mmol/l. Controlled with special diet and/or oral hypoglycemic agents. | Fasting plasma glucose >16.5 mmol/l, with or without clinical symptoms. Insulin therapy required. | Ketoacidosis or hyperosmolarity (>27.8 mmol/l) without acidosis |
| Lactate (mmol/l)                                                                                    | 2.0 – 2.99                                                              | 3.00 – 3.99                                                                                      | 4.00 – 4.99                                                                                       | ≥ 5.00 or lactic acidosis                                       |

|                                                           | <b>Grade 1<br/>Mild</b>                                                  | <b>Grade 2<br/>Moderate</b>                                                       | <b>Grade 3<br/>Severe</b>                                                                     | <b>Grade 4<br/>Life threatening</b>                                                        |
|-----------------------------------------------------------|--------------------------------------------------------------------------|-----------------------------------------------------------------------------------|-----------------------------------------------------------------------------------------------|--------------------------------------------------------------------------------------------|
| <b>GASTRO-INTESTINAL/HEPATIC/PANCREATIC ABNORMALITIES</b> |                                                                          |                                                                                   |                                                                                               |                                                                                            |
| Nausea.                                                   | Transient nausea, normal diet.                                           | Restricted diet for < 3 days                                                      | Restricted diet for ≥3 days                                                                   | Liquid only diet, Hospitalization required.                                                |
| Vomiting.                                                 | < 3 episodes / day and duration ≤ 1 week.                                | ≥ 3 episodes / day or duration > 1 week                                           | All solid/liquid vomiting for ≥24 h, IV fluid required                                        | Hypovolemic shock                                                                          |
| Diarrhoea.                                                | 3 – 4 stools / day, and duration ≤ 1 week                                | 5-7 stools / day, or duration > 1 week                                            | > 7 stools/day or with bloody stools or IV fluid required                                     | Hypovolemic shock                                                                          |
| Slow transit.                                             | NA                                                                       | 78 h without stools, Moderate abdominal pain, outpatient treatment.               | Meteorism. Requiring disimpaction or hospital treatment.                                      | Occlusion                                                                                  |
| Dysphagia.                                                | Mild discomfort                                                          | Difficulty in swallowing, food intake possible                                    | Inability to swallow solids                                                                   | Inability to swallow liquids, IV fluid required                                            |
| <b>RESPIRATORY AND CARDIOVASCULAR ABNORMALITIES</b>       |                                                                          |                                                                                   |                                                                                               |                                                                                            |
| Bronchospasm.                                             | Transient, no treatment,                                                 | Permanent, Controlled by bronchodilators                                          | Persists under bronchodilators.                                                               | Cyanosis,                                                                                  |
| Dyspnoea                                                  | Dyspnoea upon exertion                                                   | Dyspnoea during normal daily activities                                           | Dyspnoea at rest                                                                              | Dyspnoea requiring respiratory assistance.                                                 |
| Heart failure                                             | NA                                                                       | NA                                                                                | No failure                                                                                    | Failure                                                                                    |
| Cardiac rhythm disorders.                                 | NA                                                                       | Isolated ventricular extrasystoles, no treatment                                  | Recurrent, persistent or symptomatic cardiac rhythm disorders requiring outpatient treatment. | Cardiac rhythm disorders requiring hospitalization.                                        |
| Prolonged QT interval.                                    | NA                                                                       | Man: >450 and ≤ 500 ms<br>Woman: >470 and ≤500 ms                                 | >500 ms with no clinical symptoms                                                             | >500 ms with clinical symptoms (ventricular rhythm disorders, syncope, torsade de pointes) |
| Cardiac ischaemia                                         | NA                                                                       | NA                                                                                | Stable angina                                                                                 | Unstable angina, preinfarction syndrome, myocardial infarction,                            |
| Pericarditis                                              | Chance discovery of a small asymptomatic effusion during ultrasound scan | Moderate paucisymptomatic effusion. No treatment or intervention deemed necessary | Significant symptomatic effusion requiring treatment or intervention, no tamponade            | Tamponade.                                                                                 |



|                                                      | <b>Grade 1<br/>Mild</b>                                                         | <b>Grade 2<br/>Moderate</b>                                                                       | <b>Grade 3<br/>Severe</b>                                                                                                               | <b>Grade 4<br/>Life threatening</b>                                                                                                                  |
|------------------------------------------------------|---------------------------------------------------------------------------------|---------------------------------------------------------------------------------------------------|-----------------------------------------------------------------------------------------------------------------------------------------|------------------------------------------------------------------------------------------------------------------------------------------------------|
| Stroke                                               | NA                                                                              | NA                                                                                                | Transient ischemic attack (regressive within 24 h).                                                                                     | Stroke, non-regressive within 24 h.                                                                                                                  |
| Peripheral arterial embolism                         | NA                                                                              | NA                                                                                                | NA                                                                                                                                      | Peripheral arterial embolism                                                                                                                         |
| Deep vein thrombosis                                 | NA                                                                              | NA                                                                                                | Deep vein thrombosis                                                                                                                    | Pulmonary embolism                                                                                                                                   |
| <b>CUTANEOUS ABNORMALITIES</b>                       |                                                                                 |                                                                                                   |                                                                                                                                         |                                                                                                                                                      |
| Cutaneous and/or mucosal eruptions.                  | Erythaema, Moderate pruritis.                                                   | Extended maculopapular eruption, with or without pruritis.                                        | Extended papulovesicular or oozing eruption, palpable purpura<br>Polymorphous erythaema.<br>Small-size cutaneous or mucous ulcerations. | Blistering cutaneous and/or mucosal lesions (Lyell or Stevens-Johnson).<br>Febrile erythrodermia,<br>Cutaneous necrosis requiring surgical excision. |
| Immediate hypersensitivity                           | NA                                                                              | Acute localised urticaria.                                                                        | Giant urticaria,<br>Quincke's oedema.                                                                                                   | Anaphylactic shock.                                                                                                                                  |
| <b>NEUROLOGICAL ABNORMALITIES</b>                    |                                                                                 |                                                                                                   |                                                                                                                                         |                                                                                                                                                      |
| Wakefulness / sleep disorders.                       | Minor sleep disorders.                                                          | Diurnal somnolence and/or difficulty falling asleep and/or night time awakening                   | Sleep-wake cycle modification, or change in dream content requiring treatment or treatment modification                                 | Sleep-wake cycle disorganisation not responding to treatment or treatment modification                                                               |
| Disorders of consciousness, disorientation, seizures | Minor concentration impairment.                                                 | Mental activity decreased                                                                         | Confusional syndrome with disorientation.                                                                                               | Coma and/or seizures.                                                                                                                                |
| Psychiatric disorders.                               | Minor anxiety.                                                                  | Anxiety requiring treatment or moderate depression.                                               | Major anxiety or confirmed depressive episode requiring treatment.                                                                      | Acute psychosis requiring hospitalization, including suicidal ideation, manic state, hallucinations.                                                 |
| Pain, paraesthesia                                   | Intermittent, no treatment.                                                     | Responsive to level I analgesics.                                                                 | Responsive to level II or III analgesics.                                                                                               | Not responsive to level III analgesics.                                                                                                              |
| Motor deficiency.                                    | Subjective feeling of weakness without objective impairment, no reflex changes. | Distal motor deficiency, moderate functional impairment or reflex changes.                        | Marked motor deficiency interfering with normal daily activities.                                                                       | Confined to bed or a wheelchair because of motor deficiency.                                                                                         |
| Difficulty incontrolling movement.                   | Occasional clumsiness, mild coordination difficulties.                          | Tremor or dyskinesia or dysmetria, or dysarthria, moderate limitation of normal daily activities. | Upper or lower limbs ataxia or abnormal movements, limitation of normal daily activities.                                               | Inability to stand up. Total dependence.                                                                                                             |

|                                                      | <b>Grade 1<br/>Mild</b>                                                                                                                | <b>Grade 2<br/>Moderate</b>                                                                                            | <b>Grade 3<br/>Severe</b>                                                                                                     | <b>Grade 4<br/>Life threatening</b>                                                                                        |
|------------------------------------------------------|----------------------------------------------------------------------------------------------------------------------------------------|------------------------------------------------------------------------------------------------------------------------|-------------------------------------------------------------------------------------------------------------------------------|----------------------------------------------------------------------------------------------------------------------------|
| Sensory loss.                                        | Mild sensory loss, regardless of mode and distribution (focal or symmetric).                                                           | Moderate sensory loss.                                                                                                 | Severe sensory loss.                                                                                                          | Extensive sensory loss involving the trunk and four limbs.                                                                 |
| <b>MISCELLANEOUS</b>                                 |                                                                                                                                        |                                                                                                                        |                                                                                                                               |                                                                                                                            |
| Fever (oral temperature, °C)                         | 37.7 – 38.9                                                                                                                            | 39 – 39.5                                                                                                              | 39.6 – 40.5                                                                                                                   | > 40.5                                                                                                                     |
| Renal colic.                                         | Spontaneous regression of symptoms. Pain not requiring treatment.                                                                      | Colic requiring medical treatment.                                                                                     | Obstructive syndrome, requiring intervention.                                                                                 | NA                                                                                                                         |
| Fatigue.                                             | Normal daily activities reduced by less than 25%) for less than 48 h.                                                                  | Normal daily activities reduced by 25 – 50 %) for more than 48 h.                                                      | Normal daily activities reduced by more than 50%), cannot work for more than 48 h.                                            | Assistance required for normal daily activities.                                                                           |
| Arthritis / Arthralgia.                              | Arthralgia.                                                                                                                            | Arthralgia, with or without articular effusion or with moderate functional impairment.                                 | Marked arthritis with or without effusion or with severe functional impairment.                                               | NA                                                                                                                         |
| Ocular disorders.                                    | Conjunctival hyperaemia.                                                                                                               | Moderate pain. Conjunctivitis.                                                                                         | Severe pain. Decreased visual acuity. Uveitis. Glaucoma.                                                                      | NA                                                                                                                         |
| Other abnormalities NOT found elsewhere in the Table | Mild or transient discomfort, without limitation of normal daily activities; no medical intervention or corrective treatment required. | Mild to moderate limitation of normal daily activities; minimal medical intervention or corrective treatment required. | Marked limitation of normal daily activities; medical intervention and corrective treatment required (sometimes at hospital). | Severe limitation of normal daily activities; medical intervention and corrective treatment required (always at hospital). |

## Appendix 2: Diagnostic criteria for the most frequent diseases other than tuberculosis

|                  | Diseases                                                                                                     | Probable                                                                                                                                                                                                                                                                | Definitive                                                                                                                                                                                                                       |
|------------------|--------------------------------------------------------------------------------------------------------------|-------------------------------------------------------------------------------------------------------------------------------------------------------------------------------------------------------------------------------------------------------------------------|----------------------------------------------------------------------------------------------------------------------------------------------------------------------------------------------------------------------------------|
| <b>Bacterial</b> | <b>Enteritis</b>                                                                                             | NA                                                                                                                                                                                                                                                                      | (i) At least three loose stools per day for > two days, AND (ii) isolation of non-typhi <i>salmonella sp</i> or <i>Shigella sp</i> from stool and/or blood culture, or of any clinically significant bacteria from stool culture |
|                  | <b>Pneumonia</b>                                                                                             | (i) Consistent clinical picture, (ii) chest radiographic evidence of alveolar pulmonary disease, (iiI) absence of criteria for probable or definitive tuberculosis, AND (iv) successful response to antibiotherapy with no activity against <i>Pneumocystis carinii</i> | (i) Consistent clinical picture, (ii) chest radiographic evidence of alveolar pulmonary disease, or radiology not performed, AND (iii) isolation of a clinically significant bacteria from blood culture                         |
|                  | <b>Isolated bacteraemia</b>                                                                                  | NA                                                                                                                                                                                                                                                                      | (i) Fever with no clinical or paraclinical focus, AND (ii) isolation of a clinically significant bacteria from blood culture                                                                                                     |
|                  | <b>Pyelonephritis</b>                                                                                        | NA                                                                                                                                                                                                                                                                      | (i) Consistent clinical picture, AND (ii) Isolation of a clinically significant pathogen from blood culture or urine culture                                                                                                     |
|                  | <b>Salpingitis</b>                                                                                           | (i) Consistent clinical picture, AND (ii) consistent ultrasound or CT Scan picture OR typical gross appearance at surgery                                                                                                                                               | (i) Correspondent probable diagnosis criteria, AND (ii) Isolation of a clinically significant pathogen from blood or per-surgery fluid culture                                                                                   |
|                  | <b>Prostatitis</b>                                                                                           | Consistent clinical and ultrasound or CT Scan picture                                                                                                                                                                                                                   | i) Correspondent probable diagnosis criteria, AND (ii) Isolation of a clinically significant pathogen from blood or urine culture                                                                                                |
|                  | <b>Orchiepididimitis</b>                                                                                     | Consistent clinical picture                                                                                                                                                                                                                                             | (i) Correspondent probable diagnosis criteria, AND (ii) Isolation of a clinically significant pathogen from blood culture                                                                                                        |
|                  | <b>Pyomyositis</b>                                                                                           | Consistent clinical picture                                                                                                                                                                                                                                             | (i) Correspondent probable diagnosis criteria, AND (ii) Isolation of a clinically significant pathogen from blood culture                                                                                                        |
|                  | <b>Thypoid fever</b>                                                                                         | NA                                                                                                                                                                                                                                                                      | (i) Consistent clinical picture, AND (ii) Isolation of Salmonella Typhi from stool and/or blood culture,                                                                                                                         |
|                  | <b>Otitis</b>                                                                                                | Characteristic clinical picture including typical aspect on otoscopic examination                                                                                                                                                                                       | (i) Correspondent probable diagnosis criteria, AND (ii) isolation of <i>Streptococcus pneumoniae</i> or <i>Haemophilus influenzae</i> from blood culture                                                                         |
| <b>Sinusitis</b> | (i) Consistent clinical picture and (ii) characteristic radiographic evidence of maxillary sinus involvement | (i) Correspondent probable diagnosis criteria and (ii) isolation of <i>Streptococcus pneumoniae</i> or <i>Haemophilus influenzae</i> from blood culture                                                                                                                 |                                                                                                                                                                                                                                  |

|                                                        | Diseases                                              | Probable                                                                                                                                                                                                                                                                                                                                                        | Definitive                                                                                                                                                                                                                              |
|--------------------------------------------------------|-------------------------------------------------------|-----------------------------------------------------------------------------------------------------------------------------------------------------------------------------------------------------------------------------------------------------------------------------------------------------------------------------------------------------------------|-----------------------------------------------------------------------------------------------------------------------------------------------------------------------------------------------------------------------------------------|
| <b>Other AIDS or WHO Stage 4 infectious diseases *</b> | <b>Nontuberculous mycobacteria infection</b>          | NA                                                                                                                                                                                                                                                                                                                                                              | (i) Consistent clinical picture, AND (ii) Positive culture for NTM from at least three separate expectorated sputum samples, OR positive culture from one sample of normally sterile body fluid or tissue from a site other than lungs. |
|                                                        | <b><i>Pneumocystis jirovecii</i> pneumonia</b>        | (i) History of dyspnea on exertion or non-productive cough of recent onset (within the previous 3 months), (ii) chest radiographic evidence of diffuse bilateral pulmonary disease, (iii) no criteria for bacterial pneumonia or tuberculosis, and no evidence for a pneumonia due to any other pathogen, AND successful response to anti pneumocystis therapy. | (i) Consistent clinical picture, (ii) and presence of <i>Pneumocystis jirovecii</i> in a pulmonary specimen                                                                                                                             |
|                                                        | <b>Cerebral toxoplasmosis</b>                         | (i) Recent onset of a focal neurological abnormality consistent with intracranial disease or a reduced level of consciousness, (ii) brain imaging evidence of a lesion having a mass effect on computerized tomography or the radiographic appearance of which is enhanced by injection of contrast medium                                                      | (i) Correspondent probable diagnosis criteria, AND (ii) successful response to therapy for toxoplasmosis                                                                                                                                |
|                                                        | <b>Cryptococcosis</b>                                 | NA                                                                                                                                                                                                                                                                                                                                                              | Microscopy and culture of cerebrospinal fluid (CSF) : positive India ink staining and/or culture on Sabouraud medium and/or cryptococcal antigen by Latex agglutination                                                                 |
|                                                        | <b>Cytomegalovirus (CMV) retinitis</b>                | Characteristic initial appearance and evolution under specific therapy on serial ophthalmoscopic examinations                                                                                                                                                                                                                                                   | NA                                                                                                                                                                                                                                      |
|                                                        | <b>Visceral Herpes Simplex Virus or CMV infection</b> | NA                                                                                                                                                                                                                                                                                                                                                              | (i) Consistent clinical picture and (ii) Histology                                                                                                                                                                                      |
|                                                        | <b>Isosporiasis</b>                                   | NA                                                                                                                                                                                                                                                                                                                                                              | (i) At least three loose stools per day for > two days and (ii) presence of <i>Isospora belli</i> on stool direct examination                                                                                                           |
|                                                        | <b>Cryptosporidiosis</b>                              | NA                                                                                                                                                                                                                                                                                                                                                              | (i) At least three loose stools per day for > two days, and (ii) presence of <i>Cryptosporidium</i> sp using modified Ziehl-Nelsen stains or immunofluorescence                                                                         |
|                                                        | <b>Oesophageal candidiasis</b>                        | (i) Retrosternal pain or difficulty on swallowing, AND (ii) Characteristic macroscopic gross appearance at endoscopy                                                                                                                                                                                                                                            | (i) Correspondent probable diagnosis criteria, AND (ii) microscopic evidence of yeasts                                                                                                                                                  |

|                                               | Diseases                                     | Probable                                                                                                                                                                                                       | Definitive                                                                                                                                                                                                                        |
|-----------------------------------------------|----------------------------------------------|----------------------------------------------------------------------------------------------------------------------------------------------------------------------------------------------------------------|-----------------------------------------------------------------------------------------------------------------------------------------------------------------------------------------------------------------------------------|
| <b>Other non-AIDS infectious diseases *</b>   | <b>Microsporidiosis</b>                      | NA                                                                                                                                                                                                             | (i) At least three loose stools per day for > two days, AND (ii) presence of Microsporidia using trichrome stains or immunofluorescence                                                                                           |
|                                               | <b>Non classifying Parasitic enteritis</b>   | NA                                                                                                                                                                                                             | (i) At least three loose stools per day for > two days, AND (ii) presence of <i>Schistosoma</i> sp, <i>Giardia</i> sp, <i>Ankylostoma</i> sp, <i>Entamoeba histolytica</i> or <i>Strongyloides</i> sp on stool direct examination |
|                                               | <b>Malaria</b>                               | NA                                                                                                                                                                                                             | (i) Consistent clinical picture, AND (ii) presence of <i>Plasmodium</i> sp on thick blood smear                                                                                                                                   |
| <b>Malignancies</b>                           | <b>Kaposi's sarcoma</b>                      | Characteristic gross appearance of an erythematous or violaceous plaque-like lesion on skin or mucous membrane                                                                                                 | (i) Consistent clinical picture and (ii) Histology                                                                                                                                                                                |
|                                               | <b>Any other AIDS or non-AIDS malignancy</b> | NA                                                                                                                                                                                                             | (i) Consistent clinical picture, AND (ii) Histology                                                                                                                                                                               |
| <b>Other non AIDS non-infectious diseases</b> | <b>Myocardopathy, compensated</b>            | (i) Chest x-ray showing cardiac enlargement AND/OR electrocardiogram showing left ventricular hypertrophy, AND (ii) no clinical signs and symptoms of decompensated heart failure                              | Echocardiogram showing a left ventricular ejection fraction of < 45%), AND (ii) no clinical signs and symptoms of decompensated heart failure                                                                                     |
|                                               | <b>Myocardopathy, decompensated</b>          | (i) Chest x-ray showing cardiac enlargement AND/OR electrocardiogram showing left ventricular hypertrophy, AND (ii) clinical signs and symptoms of decompensated heart failure                                 | Echocardiogram showing a left ventricular ejection fraction of < 45%), AND (ii) clinical signs and symptoms of decompensated heart failure                                                                                        |
|                                               | <b>Stroke</b>                                | (i) Rapid onset of consistent clinical picture including focal neurological deficits, (ii) no other explanation, (iii) CT Scan or MRI Scan not done, AND (iv) further stabilization of regression of the signs | (i) Consistent clinical picture, AND (ii) CT Scan or MRI Scan showing images of stroke                                                                                                                                            |
|                                               | <b>Deep venous thrombosis</b>                | NA                                                                                                                                                                                                             | (i) Consistent clinical picture, AND (ii) phlebography or ultrasonography showing images of deep vein thrombosis                                                                                                                  |
|                                               | <b>Pulmonary embolism</b>                    | NA                                                                                                                                                                                                             | (i) Consistent clinical picture, AND (ii) pulmonary angiography showing images of pulmonary embolism                                                                                                                              |

|                            | Diseases                                         | Probable                                                                                                                                                                                                                                                                                                                                      | Definitive |
|----------------------------|--------------------------------------------------|-----------------------------------------------------------------------------------------------------------------------------------------------------------------------------------------------------------------------------------------------------------------------------------------------------------------------------------------------|------------|
| <b>Others non specific</b> | <b>Unexplained diarrhea ≤1 month</b>             | (i) At least three loose stools per day for > 2 days and ≤1 month separated >1 month from any other episode of diarrhea, AND (ii) absence of definitive criteria of « bacterial enteritis », « isosporiasis » or « Cryptosporidiosis », “microsporidiosis”, or “Non classifying Parasitic enteritis”                                          | NA         |
|                            | <b>Unexplained diarrhea &gt;1 month</b>          | (i) At least three loose stools per day for >1 month, AND (ii) absence of definitive criteria of « bacterial enteritis », « isosporiasis » or « Cryptosporidiosis », “microsporidiosis”, or “Non classifying Parasitic enteritis”                                                                                                             | NA         |
|                            | <b>Unexplained fever ≤1 month</b>                | Fever > 37.5°C of unexplained origin for ≤1 month, separated >1 month from any other febrile episode                                                                                                                                                                                                                                          | NA         |
|                            | <b>Unexplained fever &gt;1 month</b>             | Fever > 37.5°C of unexplained origin for >1 month, intermittent or constant                                                                                                                                                                                                                                                                   | NA         |
|                            | <b>Unexplained pneumonia</b>                     | (i) Consistent clinical picture, (ii) chest radiographic evidence of pulmonary disease, (iii) non microbiological evidence of a pneumonia due to any other known pathogen, (iii) absence of definitive or presumptive criteria of <i>Pneumocystis jirovecii</i> pneumonia, AND (iv) unsuccessful response to standard antituberculous therapy | NA         |
|                            | <b>Undocumented sepsis</b>                       | (i) Consistent clinical picture, (ii) absence of criteria for probable or definitive tuberculosis or any invasive bacterial disease, AND (iii) death OR successful response to a combined treatment including large spectrum antibiotics and antituberculous treatment.                                                                       | NA         |
|                            | <b>Unexplained central neurological symptoms</b> | (i) Central neurological symptoms leading to death, AND (ii) absence of criteria for cerebral toxoplasmosis, cryptococcosis, tuberculosis, malaria, and stroke                                                                                                                                                                                | NA         |

\* For diseases not listed here, please refer to « *WHO case definitions of HIV for surveillance and revised clinical staging and immunological classification of HIV-related disease in adults and children. 2006 revision*; <http://www.who.int/hiv/pub/guidelines/hivstaging/en/index.htm>, appendix 1 ; pages 18-27.
